# Supplementary material
Source: PubMed Central journal article supplement (PMC6287955)
Supplement: NIHMS994820-supplement-Supporting_Information.pdf [file NIHMS994820-supplement-Supporting_Information.pdf]

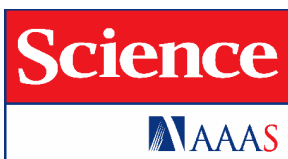

## Supplementary Materials for

### **Deconstructive fluorination of cyclic amines by carbon-carbon cleavage**

Jose B. Roque,\* Yusuke Kuroda,\* Lucas T. Göttemann, Richmond Sarpong†

\*These authors contributed equally to this work.

†Corresponding author. Email: rsarpong@berkeley.edu

Published 13 July 2018, *Science* **361**, 171 (2018)

DOI: 10.1126/science.aat6365

#### **This PDF file includes:**

Materials and Methods  
Figs. S1 to S3  
NMR Spectra  
References

**Table of Contents**

|                                                                               |     |
|-------------------------------------------------------------------------------|-----|
| <b>1. General Considerations</b> .....                                        | S3  |
| <b>2. Experimental Procedures for Preparation of Starting Materials</b> ..... | S4  |
| <b>3. Experimental Procedures for the Silver-Mediated Fluorination</b> .....  | S12 |
| <b>4. Mechanistic Studies</b> .....                                           | S23 |
| <b>5. NMR Studies</b> .....                                                   | S25 |
| <b>6. Electrochemical Measurement</b> .....                                   | S26 |
| <b>7. NMR Spectra</b> .....                                                   | S28 |
| <b>8. References and Notes</b> .....                                          | S75 |

## 1. General Considerations

### 1.1. Solvents and Reagents

Tetrahydrofuran (THF) and triethylamine (Et<sub>3</sub>N) were sparged with argon and dried by passing through alumina columns using argon in a Glass Contour solvent purification system. Dichloromethane (CH<sub>2</sub>Cl<sub>2</sub>) was freshly distilled over calcium hydride under a N<sub>2</sub> atmosphere prior to each use. N-Boc-piperidine (**1c**), N-methyl-2-pyrrolidinone (**1p**) and N-methyl-2-piperidinone (**1n**) were obtained from commercial vendors and used as received. Reagents for the fluorination reaction were purchased from commercial vendors as follows: Silver tetrafluoroborate (AgBF<sub>4</sub>, 99%) was purchased from Oakwood Chemicals and stored in a glovebox. Selectfluor<sup>®</sup> was purchased from Matrix Scientific. Acetone (HPLC) was purchased from Fisher Scientific. Water (HPLC) was purchased from Fisher Scientific.

### 1.2. Experimental Procedures

Unless otherwise noted in the experimental procedures, reactions were carried out in flame or oven-dried glassware under a positive pressure of N<sub>2</sub> in anhydrous solvents using standard Schlenk techniques. Reaction temperatures above room temperature (22–23 °C) were controlled by an IKA<sup>®</sup> temperature modulator and monitored using liquid-in-glass thermometers. Reaction progress was monitored using a combination of LC/MS analysis (via a Shimadzu LCMS-2020 (UFLC) equipped with the LC-20AD solvent delivery system, a SPD-20AV prominence UV/Vis detector (SPD-M20A Photo Diode Array), and a Thermo Scientific Hypersil GOLD HPLC column (5 μm particle size, 4.6 × 50 mm)), and thin-layer chromatography (TLC) on SiliCycle Siliplates (glass backed, extra hard layer, 60 Å, 250 μm thickness, F254 indicator). Flash column chromatography was performed with either glass columns using Silicycle silica gel (40–63 μm particle size) or with a Yamazen Smart Flash EPCLC W-Prep 2XY (dual channel) automated flash chromatography system on prefilled, premium, universal columns using ACS grade solvents. Preparative thin layer chromatography was performed on SiliCycle Siliplates (glass backed, extra hard layer, 60 Å, 250 μm thickness, F254 indicator).

### 1.3. Analytical Instrumentation

<sup>1</sup>H NMR and <sup>13</sup>C NMR data were recorded on Bruker AVQ-400, AVB-400, RDX-500, AV-600 and AV-700 spectrometers using CDCl<sub>3</sub> as solvents, typically at 20–23 °C. Chemical shifts (δ) are reported in ppm relative to the residual solvent signal (δ 7.26 for <sup>1</sup>H NMR, δ 77.16 for <sup>13</sup>C NMR in CDCl<sub>3</sub>, δ 3.31 for <sup>1</sup>H NMR, δ 49.00 for <sup>13</sup>C NMR in CD<sub>3</sub>OD). The <sup>19</sup>F NMR spectra were acquired on an AVQ-400 spectrometer and internally referenced to CFC<sub>3</sub> (δ 0.00). Data for <sup>1</sup>H, <sup>13</sup>C and <sup>19</sup>F NMR spectroscopy are reported as follows; chemical shift (δ ppm), multiplicity (s = singlet, d = doublet, t = triplet, q = quartet, quint = quintet, hept = heptet, m = multiplet, br = broad), coupling constant (Hz), integration. Melting points were determined using a MEL-TEMP<sup>™</sup> apparatus and are uncorrected. Optical rotations were measured on a Perkin-Elmer 241

polarimeter. High-resolution mass spectra (HRMS) were obtained from the Catalysis Facility of the Lawrence Berkeley National Laboratory (supported by the Director, Office of Science, of the US Department of Energy under contract no. DE-AC02-05CH11231) using a PerkinElmer AxION 2 TOF-MS.

## 2. Experimental Procedures for Preparation of Starting Materials

### 2.1. Preparation of *N*-Protected Cyclic Amines

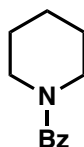

**Phenyl(piperidin-1-yl)methanone (1a)** was prepared according to a published procedure. Spectral data were in full agreement with the reported literature values (44).

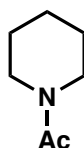

**1-(Piperidin-1-yl)ethan-1-one (1b)** was prepared according to a published procedure. Spectral data were in full agreement with the reported literature values (45).

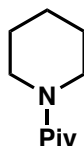

**2,2-Dimethyl-1-(piperidin-1-yl)propan-1-one (1d)** was prepared according to a published procedure. Spectral data were in full agreement with the reported literature values (46).

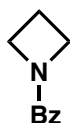

**Azetidin-1-yl(phenyl)methanone (1e)** was prepared according to a published procedure. Spectral data were in full agreement with the reported literature values (44).

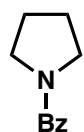

**Phenyl(pyrrolidin-1-yl)methanone (1f)** was prepared according to a published procedure. Spectral data were in full agreement with the reported literature values (44).

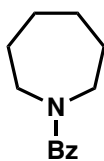

**Azepan-1-yl(phenyl)methanone (1g)** was prepared according to a published procedure. Spectral data were in full agreement with the reported literature values (47).

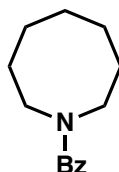

**Azocan-1-yl(phenyl)methanone (1h):** A 25 mL round-bottomed flask was charged with a solution of azocane (300 mg, 3.02 mmol) and Et<sub>3</sub>N (0.57 mL, 4.1 mmol) in CH<sub>2</sub>Cl<sub>2</sub> (5.0 mL) and cooled to 0 °C. Benzoyl chloride (0.320 mL, 2.75 mmol) was added dropwise over 5 min and the resulting mixture was warmed to room temperature. After 24 h, the reaction mixture was quenched with 1 M HCl aq. (5.0 mL) and the phases were separated. The aqueous phase was extracted with CH<sub>2</sub>Cl<sub>2</sub> (10 mL × 3). The combined organic layers were washed with brine (2.0 mL), dried over MgSO<sub>4</sub>, filtered and concentrated under reduced pressure. The crude residue was purified by column chromatography (SiO<sub>2</sub>, 50% EtOAc/hexanes) to provide the title compound (400 mg, 66%) as a yellow oil.

**<sup>1</sup>H NMR** (400 MHz, CDCl<sub>3</sub>): δ 7.41–7.34 (m, 5H), 3.62 (t, *J* = 6.1 Hz, 2H), 3.31 (br, 2H), 1.86 (br, 2H), 1.61–1.59 (m, 8H);

**<sup>13</sup>C NMR** (101 MHz, CDCl<sub>3</sub>) δ 171.5, 137.7, 129.0, 128.5, 126.4, 51.2, 46.7, 27.0, 26.5, 26.4, 25.6, 24.2;

**HRMS** (ESI): Calc'd for C<sub>14</sub>H<sub>20</sub>NO [M+H]<sup>+</sup>: 218.1539, found: 218.1535.

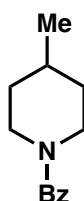

**(4-Methylpiperidin-1-yl)(phenyl)methanone (1i)** was prepared from 4-methylpiperidine using a procedure analogous to that for the preparation of **1h**. Spectral data were in full agreement with the reported literature values (48).

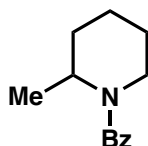

**(2-Methylpiperidin-1-yl)(phenyl)methanone (1j)** was prepared according to a published procedure. Spectral data were in full agreement with the reported literature values (49).

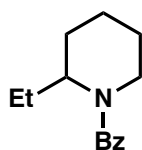

**(2-Ethylpiperidin-1-yl)(phenyl)methanone (1k)** was prepared from 2-ethylpiperidine using a procedure analogous to that used for the synthesis of **1h**. The title compound was obtained as a colorless oil (525 mg, 81%).

**<sup>1</sup>H NMR** (600 MHz, CDCl<sub>3</sub>, *ca.* 1:1 mixture of rotamers): δ 7.38–7.33 (m, 5H), 4.81 (br, 0.5H), 4.57 (br, 0.5H), 3.67 (br, 0.5H), 3.49 (br, 0.5H), 3.02 (br, 0.5H), 2.78 (br, 0.5H), 1.81–1.76 (m, 1H), 1.74–1.31 (m, 7H), 0.95 (br, 1.5H), 0.73 (br, 1.5H);

**<sup>13</sup>C NMR** (151 MHz, CDCl<sub>3</sub>, mixture of rotamers): δ 170.9, 137.3, 129.1, 128.5, 126.6, 56.1, 49.8, 43.3, 37.0, 28.8, 28.0, 26.4, 25.9, 22.8, 19.2, 10.8 (*One <sup>13</sup>C signal is overlapping with others due to amide rotation*);

**HRMS** (ESI): Calc'd for C<sub>14</sub>H<sub>20</sub>NO [M+H]<sup>+</sup>: 218.1538, found: 218.1540.

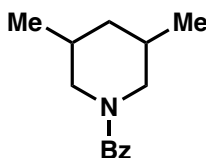

**(3,5-Dimethylpiperidin-1-yl)(phenyl)methanone (1l)** was prepared from 3,5-dimethylpiperidine (mixture of *cis* and *trans*) using a procedure analogous to that for the preparation of **1h**. Spectral data were in full agreement with the literature values (50).

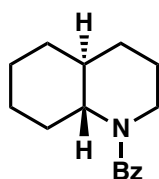

**(Octahydroquinolin-1(2H)-yl)(phenyl)methanone (1m)** was prepared from *trans*-decahydroquinoline using a procedure analogous to that used for the synthesis of **1h**. The title compound was obtained as a yellow oil (276 mg, 53%).

**<sup>1</sup>H NMR** (400 MHz, CDCl<sub>3</sub>): δ 7.36 (br, 5H), 3.50 (td, *J* = 10.7, 3.2 Hz, 1H), 2.43–2.28 (m, 2H), 2.29–2.24 (m, 1H), 1.79–1.52 (m, 7H), 1.49–1.16 (m, 4H), 1.13–1.03 (m, 1H);

**<sup>13</sup>C NMR** (101 MHz, CDCl<sub>3</sub>): 171.6, 137.8, 129.3, 128.4, 126.9, 61.3, 42.4, 38.2, 33.2, 30.5, 26.7, 26.3, 25.6, 23.7;

**HRMS** (ESI): Calc'd for C<sub>16</sub>H<sub>22</sub>NO [M+H]<sup>+</sup>: 244.1696, found: 244.1697.

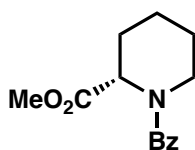

**Methyl (S)-1-Benzoylpiperidine-2-carboxylate (1n)** was prepared from L-pipecolic acid methyl ester hydrochloride using a procedure analogous to that used for the preparation of **1h**. Spectral data were in full agreement with the reported literature values (51).

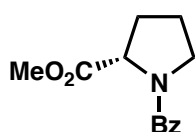

**Methyl Benzoyl-L-prolinate (1o)** was prepared from L-proline methyl ester hydrochloride using a procedure analogous to that used for the synthesis of **1h**. Spectral data were in full agreement with the reported literature values (52).

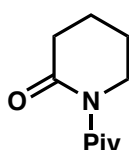

**1-Pivaloylpiperidin-2-one (1r)** was prepared from 2-piperidinone and pivaloyl chloride using a procedure analogous to that used for the synthesis of **1h**. The title compound was obtained as a colorless oil (456 mg, 83%).

$^1\text{H NMR}$  (500 MHz,  $\text{CDCl}_3$ ):  $\delta$  3.50 (br s, 2H), 2.46 (t,  $J = 5.8$  Hz, 2H), 1.85–1.84 (m, 4H), 1.28 (s, 9H);

$^{13}\text{C NMR}$  (126 MHz,  $\text{CDCl}_3$ ):  $\delta$  190.0, 173.2, 47.2, 43.7, 34.0, 27.7, 22.7, 21.5;

**HRMS** (ESI): Calc'd for  $\text{C}_{10}\text{H}_{18}\text{NO}_2$   $[\text{M}+\text{H}]^+$ : 184.1332, found: 184.1333.

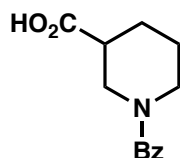

**1-Benzoylpiperidine-3-carboxylic acid (1s)** was prepared according to a published procedure. Spectral data were in full agreement with the reported literature values (53).

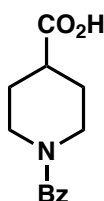

**1-Benzoylpiperidine-4-carboxylic acid (1t)** was prepared according to a published procedure. Spectral data were in full agreement with the reported literature values (54).

## 2.2. Preparation of Peptides

### Representative Procedure for Methyl Ester Hydrolysis

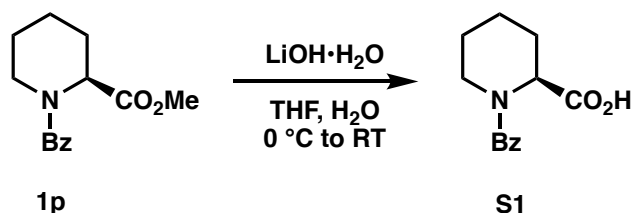

A 100 mL round-bottom flask was charged with a solution of **1p** (1.24 g, 5.00 mmol) in 3:1 THF: H<sub>2</sub>O (10 mL) and cooled to 0 °C. LiOH·H<sub>2</sub>O (210 mg, 25.0 mmol) was added and the resulting mixture was warmed to room temperature. After 13 h, the reaction mixture was cooled to 0 °C and acidified with 1 M HCl aq. (10 mL) to pH <2. The solution was then diluted with EtOAc (10 mL) and the aqueous layer was extracted with EtOAc (10 mL × 3). The combined organic layers were washed with brine (5.0 mL), dried over MgSO<sub>4</sub>, filtered and concentrated under reduced pressure to afford **S1**, which was used in the next step without further purification.

### Representative Procedure for Condensation Reaction

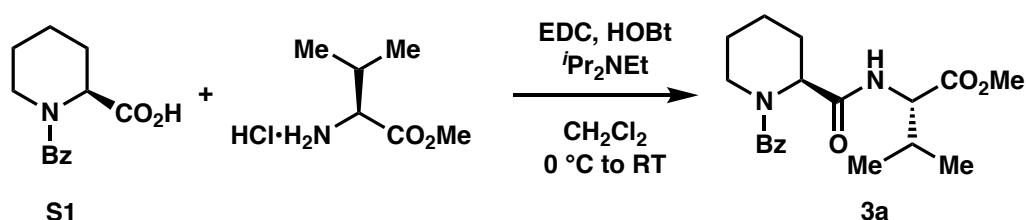

**Methyl ((S)-1-Benzoylpiperidine-2-carbonyl)-L-valinate (3a):** A 100 mL round-bottomed flask was charged with a solution of *L*-valine methyl ester hydrochloride (922 mg, 5.50 mmol) in CH<sub>2</sub>Cl<sub>2</sub> (45 mL) and cooled to 0 °C. *i*Pr<sub>2</sub>NEt (0.96 mL, 5.5 mmol) was added dropwise over 5 min and the resulting mixture was stirred at 0 °C for 10 min. To this solution were added the crude **S1**, hydroxybenzotriazole (HOBt: 676 mg, 5.00 mmol) followed by 1-(3-dimethylaminopropyl)-3-ethylcarbodiimide hydrochloride (EDC: 1.05 g, 5.50 mmol) and the resulting mixture was warmed to room temperature. After 19 h, the reaction mixture was cooled to 0 °C and quenched with 1 M HCl aq. (10 mL). The phases were separated and the aqueous phase was extracted with CH<sub>2</sub>Cl<sub>2</sub> (10 mL × 3). The combined organic layers were washed with brine (10 mL), dried over MgSO<sub>4</sub>, filtered and concentrated under reduced pressure. The crude residue was purified by column chromatography (SiO<sub>2</sub>, 25% to 50% EtOAc/ hexanes) to provide the title compound (1.23 g, 71% over 2



steps) as a white amorphous solid.

**Optical Rotation:**  $[\alpha]_D^{22} = -100$  ( $c$  0.770,  $\text{CHCl}_3$ );

**$^1\text{H}$  NMR** (600 MHz,  $\text{CDCl}_3$ , *ca.* 3:1 mixture of rotamers):  $\delta$  7.44 (br s, 5H), 7.10 (d,  $J = 6.6$  Hz, 0.75H), 6.60 (br, 0.25H), 5.29 (s, 0.75H), 4.79 (br, 0.25H), 4.64 (br, 0.25H), 4.52 (s, 0.75H), 4.42 (br, 0.25H), 3.76 (s, 3H), 3.72 (s, 0.75H), 3.04 (t,  $J = 12.4$  Hz, 0.75H), 2.86 (br, 0.25H), 2.35–2.30 (m, 1H), 2.27–2.20 (m, 1H), 1.93–1.84 (m, 0.75H), 1.76–1.74 (m, 1.25H), 1.68–1.47 (m, 3H), 0.93 (d,  $J = 6.9$  Hz, 6H);

**$^{13}\text{C}$  NMR** (151 MHz,  $\text{CDCl}_3$ , peaks of major rotamer are listed):  $\delta$  172.5, 172.0, 170.9, 135.2, 130.2, 128.6, 127.1, 57.1, 52.6, 52.1, 46.1, 30.9, 25.5, 25.3, 20.5, 19.2, 17.7;

**HRMS** (ESI): Calc'd for  $\text{C}_{19}\text{H}_{27}\text{N}_2\text{O}_4$   $[\text{M}+\text{H}]^+$ : 347.1965, found: 347.1959.

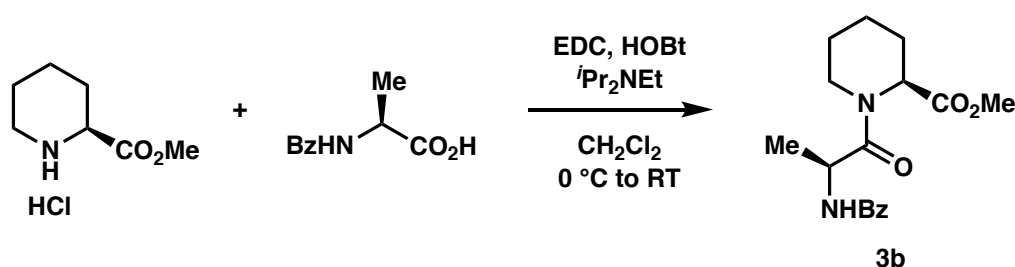

**Methyl (S)-1-(Benzoyl-L-alanyl)piperidine-2-carboxylate (3b)** was prepared from methyl (S)-piperidine-2-carboxylate (55) and *N*-benzoyl-*L*-alanine according to the representative procedure. The title compound was obtained as a colorless foam (1.37 g, 86% over 2 steps).

**Optical Rotation:**  $[\alpha]_D^{22} = -54$  ( $c$  1.7,  $\text{CHCl}_3$ );

**$^1\text{H}$  NMR** (600 MHz,  $\text{CDCl}_3$ , *ca.* 4:4:1:1 mixture of rotamers):  $\delta$  7.78 (d,  $J = 7.5$  Hz, 2H), 7.45 (t,  $J = 7.5$  Hz, 1H), 7.42–7.41 (m, 1H), 7.38 (t,  $J = 7.5$  Hz, 2H), 5.35 (d,  $J = 5.3$  Hz, 0.4H), 5.29 (d,  $J = 5.3$  Hz, 0.4H), 5.14 (quint,  $J = 6.8$  Hz, 0.4H), 5.10 (quint,  $J = 6.8$  Hz, 0.4H), 5.04 (quint,  $J = 6.8$  Hz, 0.1H), 4.94 (quint,  $J = 6.8$  Hz, 0.1H), 4.87 (d,  $J = 4.0$  Hz, 0.1H), 4.62 (d,  $J = 4.9$  Hz, 0.1H), 4.54 (d,  $J = 12.8$  Hz, 0.1H), 4.48 (d,  $J = 13.9$  Hz, 0.1H), 3.86 (d,  $J = 12.8$  Hz, 0.4H), 3.80 (d,  $J = 13.3$  Hz, 0.4H), 3.75 (s, 0.3H), 3.70 (s, 1.2H), 3.68 (s, 1.2H), 3.59 (s, 0.3H), 3.28–3.21 (m, 0.8H), 2.77–2.69 (m, 0.2H), 2.33 (d,  $J = 13.6$  Hz, 0.1H), 2.27–2.23 (m, 0.9H), 1.72–1.71 (m, 2H), 1.65–1.59 (m, 1H), 1.51–1.28 (m, 3H), 1.42 (d,  $J = 6.8$  Hz, 1.5H), 1.41 (d,  $J = 6.8$  Hz, 1.5H);

**$^{13}\text{C}$  NMR** (151 MHz,  $\text{CDCl}_3$ , peaks of 2 major rotamers are listed):  $\delta$  172.6, 172.4, 171.3, 171.2, 166.3, 166.2, 134.2, 134.2, 131.5, 128.5, 128.5, 127.1, 127.0, 52.5, 52.4, 52.3, 52.3, 46.0, 45.8, 43.5, 43.4, 26.6, 26.4, 25.2, 25.1, 20.9, 19.6, 18.2 (*Two  $^{13}\text{C}$  signals are overlapping with others*);

**HRMS** (ESI): Calc'd for  $\text{C}_{17}\text{H}_{22}\text{N}_2\text{O}_4\text{Na}$   $[\text{M}+\text{Na}]^+$ : 341.1472, found: 341.1471.

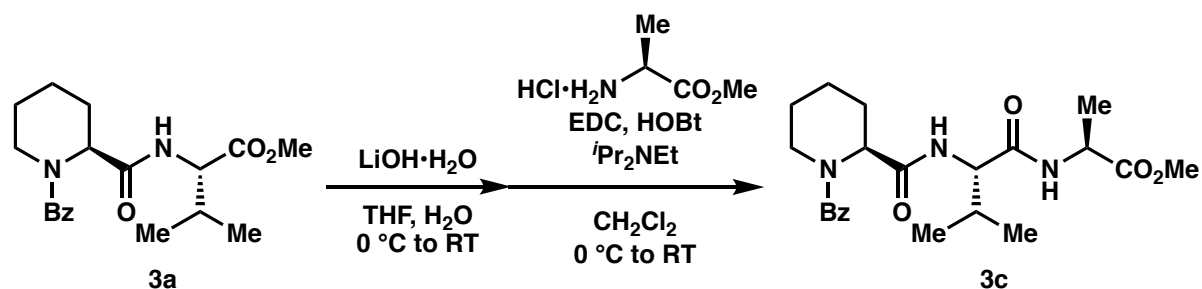

**Methyl ((*S*)-1-Benzoylpiperidine-2-carbonyl)-*L*-valyl-*L*-alaninate (3c)** was prepared from **3a** and *L*-alanine methyl ester hydrochloride according to the representative procedure. The title compound was obtained as a white amorphous solid (864 mg, 69% over 2 steps).

**Optical Rotation:**  $[\alpha]_D^{22} = -105$  (*c* 2.01, CHCl<sub>3</sub>);

**<sup>1</sup>H NMR** (600 MHz, CDCl<sub>3</sub>, *ca.* 4:1 mixture of rotamers):  $\delta$  7.43 (br s, 5H), 7.17 (d, *J* = 7.3 Hz, 0.8H), 6.79 (br, 0.2H), 6.62 (d, *J* = 5.0 Hz, 0.8H), 6.46 (br, 0.2H), 5.29 (s, 0.8H), 4.79 (br, 0.2H), 4.58 (quint, *J* = 7.2 Hz, 1H), 4.35 (br, 0.2H), 4.33–4.30 (m, 1H), 3.74 (s, 3H), 3.71 (br, 0.8H), 3.05 (t, *J* = 12.8 Hz, 0.8H), 2.88 (br, 0.2H), 2.32–2.12 (m, 2H), 1.85–1.52 (m, 5H), 1.41 (d, *J* = 7.2 Hz, 3H), 0.95 (d, *J* = 6.7 Hz, 6H);

**<sup>13</sup>C NMR** (151 MHz, CDCl<sub>3</sub>, peaks of major rotamer are listed):  $\delta$  173.2, 172.7, 171.3, 170.5, 135.2, 130.4, 128.7, 127.3, 58.4, 53.0, 52.5, 48.2, 46.2, 30.8, 25.7, 25.5, 20.8, 19.5, 18.2, 17.9;

**HRMS** (ESI): Calc'd for C<sub>22</sub>H<sub>31</sub>N<sub>3</sub>O<sub>5</sub>Na [M+Na]<sup>+</sup>: 440.2156, found: 440.2151.

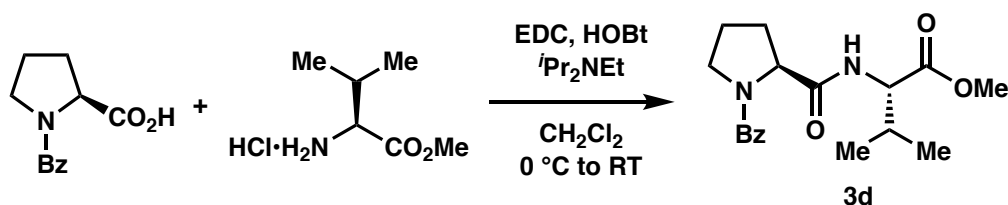

**Methyl Benzoyl-*L*-prolyl-*L*-valinate (3d)** was prepared from *N*-benzoyl-*L*-proline (**56**) and *L*-valine methyl ester hydrochloride according to the representative procedure. The title compound was obtained as a white solid (538 mg, 81%).

**Melting Point:** 104–106 °C;

**Optical Rotation:**  $[\alpha]_D^{22} = -142$  (*c* 0.960, CHCl<sub>3</sub>);

**<sup>1</sup>H NMR** (600 MHz, CDCl<sub>3</sub>):  $\delta$  7.45–7.38 (m, 5H), 7.33 (br, 1H), 4.80 (s, 1H), 4.49 (t, *J* = 6.4 Hz, 1H), 3.71 (s, 3H), 3.51 (s, 1H), 3.44 (s, 1H), 2.43 (s, 1H), 2.18–2.16 (m, 1H), 2.02 (s, 2H), 1.81 (s, 1H), 0.92 (d, *J* = 6.4 Hz, 3H), 0.89 (d, *J* = 6.4 Hz, 3H);

**<sup>13</sup>C NMR** (151 MHz, CDCl<sub>3</sub>):  $\delta$  172.2, 171.1, 171.0, 136.4, 130.3, 128.5, 127.0, 59.8, 57.6, 52.1, 50.4, 31.1, 27.1, 25.5, 19.2, 17.8;

**HRMS** (ESI): Calc'd for C<sub>18</sub>H<sub>24</sub>N<sub>2</sub>O<sub>4</sub>Na [M+Na]<sup>+</sup>: 355.1628, found: 355.1627.

### 2.3. Preparation of Enamides

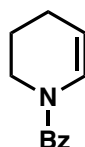

(3,4-Dihydropyridin-1(2H)-yl)(phenyl)methanone (**10a**) was prepared according to a published procedure. Spectral data were in full agreement with the reported literature values (57).

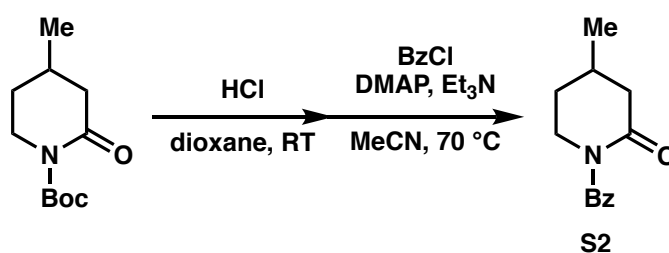

A 100 mL round-bottomed flask was charged with a solution of *tert*-butyl 4-methyl-2-oxopiperidine-1-carboxylate (**58**) (2.00 g, 9.38 mmol) in dioxane (40 mL) and cooled to 0 °C. HCl (4.0 M solution in dioxane, 7.00 mL, 28.1 mmol) was added and the resulting mixture was warmed to room temperature. After 16 h, the reaction mixture was concentrated under reduced pressure to afford a white solid, which was used in the next step without further purification. The solid was dissolved in MeCN (30 mL) and the resulting solution was cooled to 0 °C. To this solution was added Et<sub>3</sub>N (3.92 mL, 28.1 mmol), DMAP (115 mg, 0.938 mmol) and BzCl (1.31 mL, 11.3 mmol) and the reaction mixture was heated to 70 °C. After 12 h, H<sub>2</sub>O (1.0 mL) was added and the reaction mixture was allowed to continue to stir at 70 °C for an additional 1 h. The solution was then allowed to cool to room temperature, poured into a separatory funnel, and washed with sat. NaHCO<sub>3</sub> aq. (20 mL). The aqueous phase was extracted with EtOAc (10 mL × 2). The combined organic layers were washed with 1 M HCl (10 mL) and brine (10 mL), dried over MgSO<sub>4</sub>, filtered and concentrated under reduced pressure. The crude residue was purified by column chromatography (SiO<sub>2</sub>, 5% to 15% EtOAc/ hexanes) to provide **S2** (1.47 g, 73% over 2 steps) as a white solid.

**Melting Point:** 74–77 °C;

**<sup>1</sup>H NMR** (500 MHz, CDCl<sub>3</sub>): δ 7.54 (d, *J* = 7.4 Hz, 2H), 7.46 (t, *J* = 7.4 Hz, 1H), 7.38 (t, *J* = 7.4 Hz, 2H), 3.95 (dt, *J* = 12.9, 4.3 Hz, 1H), 3.64 (ddd, *J* = 12.9, 11.5, 4.0 Hz, 1H), 2.59 (ddd, *J* = 16.4, 4.6, 1.9 Hz, 1H), 2.23 (dd, *J* = 16.4, 10.9 Hz, 1H), 2.13–2.05 (m, 2H), 1.65–1.57 (m, 1H), 1.10 (d, *J* = 6.4 Hz, 3H);

**<sup>13</sup>C NMR** (126 MHz, CDCl<sub>3</sub>): δ 174.8, 173.4, 136.2, 131.6, 128.2, 128.0, 45.4, 42.9, 30.9, 28.8, 21.3;

**HRMS** (ESI): Calc'd for C<sub>13</sub>H<sub>16</sub>NO<sub>2</sub> [M+H]<sup>+</sup>: 218.1176, found: 218.1183.

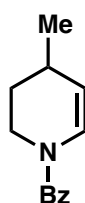

(4-Methyl-3,4-dihydropyridin-1(2*H*)-yl)(phenyl)methanone (**10b**) was prepared from **S2** according to a published procedure (57). The title compound was obtained as a colorless oil (323 mg, 74%).

<sup>1</sup>H NMR (500 MHz, CDCl<sub>3</sub>, *ca.* 3:1 mixture of conformers): δ 7.45–7.35 (m, 5H), 7.22 (br, 0.25H), 6.37 (d, *J* = 7.9 Hz, 0.75H), 5.08 (br, 0.25H), 4.68 (d, *J* = 7.9 Hz, 0.75H), 4.03 (br, 0.75H), 3.59–3.55 (m, 1H), 3.47 (br, 0.25H), 2.34 (br, 1H), 2.02 (br, 0.75H), 1.83 (br, 0.25H), 1.55 (br, 0.75H), 1.40 (br, 0.25H), 1.02 (d, *J* = 7.0 Hz, 3H);

<sup>13</sup>C NMR (126 MHz, CDCl<sub>3</sub>, peaks of major conformer are listed): δ 169.3, 135.1, 130.2, 128.4, 128.2, 126.3, 113.8, 39.9, 30.0, 27.4, 21.3;

HRMS (ESI): Calc'd for C<sub>13</sub>H<sub>16</sub>NO [M+H]<sup>+</sup>: 202.1226, found: 202.1226.

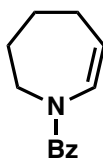

Phenyl(2,3,4,5-tetrahydro-1*H*-azepin-1-yl)methanone (**10c**) was prepared according to a published procedure. Spectral data were in full agreement with the reported literature values (59).

### 3. Experimental Procedures for the Silver-Mediated Fluorination

#### 3.1. Representative Procedure for the Silver-Mediated Monofluorination of Cyclic Amines

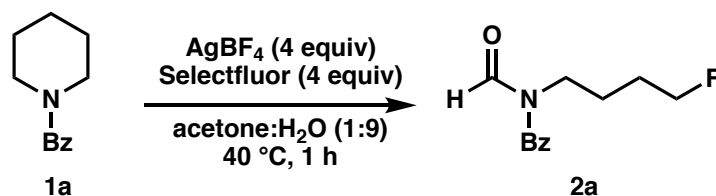

To a 1-dram vial was added sequentially **1a** (18.9 mg, 0.100 mmol), AgBF<sub>4</sub> (77.9 mg, 0.400 mmol), Selectfluor<sup>®</sup> (142 mg, 0.400 mmol) and 1:9 acetone: H<sub>2</sub>O (0.5 mL). The resulting mixture was heated to 40 °C and held at this temperature. After 1 h, the reaction mixture was partitioned with EtOAc (0.5 mL) and H<sub>2</sub>O (0.5 mL) and the phases were separated. The aqueous phase was extracted with EtOAc (1.5 mL × 3) and the combined organic layers were concentrated under reduced pressure. The crude residue was purified by preparative thin-layer chromatography (50% EtOAc/hexanes) to provide *N*-(4-fluorobutyl)-*N*-formylbenzamide (**2a**) (18.0 mg, 81%) as a pale yellow oil.

<sup>1</sup>H NMR (600 MHz, CDCl<sub>3</sub>): δ 8.93 (s, 1H), 7.57 (t, *J* = 7.2 Hz, 1H), 7.53–7.48 (m, 4H), 4.48 (dt, *J* = 47.6, 5.6 Hz, 2H), 3.92 (t, *J* = 7.1 Hz, 2H), 1.82–1.72 (m, 4H);

<sup>13</sup>C NMR (151 MHz, CDCl<sub>3</sub>): 172.5, 164.3, 133.7, 132.3, 129.1, 128.9, 83.6 (d, *J* = 165.2 Hz), 40.2, 28.0 (d, *J* = 20.2 Hz), 24.2 (d, *J* = 5.0 Hz);

<sup>19</sup>F NMR (376 MHz, CDCl<sub>3</sub>): δ -217.5 – -217.9 (m, 1F);

**HRMS** (ESI): Calc'd for  $C_{12}H_{14}FNO_2Na$   $[M+Na]^+$ : 246.0906, found: 246.0906.

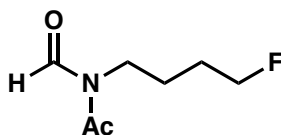

***N*-(4-Fluorobutyl)-*N*-formylacetamide (2b)**: The title compound was prepared according to the representative procedure using **1b**. Purification by preparative thin-layer chromatography (25% EtOAc/hexanes) provided the title compound (7.2 mg, 45%) as a colorless oil.

**$^1H$  NMR** (600 MHz,  $CDCl_3$ ):  $\delta$  9.16 (s, 1H), 4.45 (dt,  $J = 47.0, 5.7$  Hz, 2H), 3.73 (t,  $J = 7.3$  Hz, 2H), 2.41 (s, 3H), 1.74–1.62 (m, 4H);

**$^{13}C$  NMR** (151 MHz,  $CDCl_3$ ):  $\delta$  171.2, 162.8, 83.6 (d,  $J = 165.3$  Hz), 39.6, 27.9 (d,  $J = 20.0$  Hz), 24.3 (d,  $J = 4.3$  Hz), 23.0;

**$^{19}F$  NMR** (376 MHz,  $CDCl_3$ ):  $\delta$  -217.8 (tt,  $J = 47.9, 24.4$  Hz, 1F);

**HRMS** (EI): Calc'd for  $C_7H_{13}FNO_2$   $[M+H]^+$ : 162.0925, found: 162.0933.

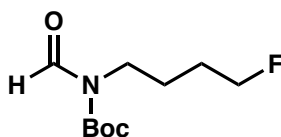

***tert*-Butyl (4-Fluorobutyl)(formyl)carbamate (2c)**: The title compound was prepared according to the representative procedure using **1c**. Purification by preparative thin-layer chromatography (25% EtOAc/hexanes) provided the title compound (8.6 mg, 39%) as a colorless oil.

**$^1H$  NMR** (600 MHz,  $CDCl_3$ ):  $\delta$  9.17 (s, 1H), 4.45 (dt,  $J = 47.0, 5.7$  Hz, 2H), 3.63 (t,  $J = 7.1$  Hz, 2H), 1.73–1.63 (m, 4H), 1.54 (s, 9H);

**$^{13}C$  NMR** (151 MHz,  $CDCl_3$ ):  $\delta$  163.2, 152.6, 84.2, 83.6 (d,  $J = 165.2$  Hz), 40.2, 28.2, 27.8 (d,  $J = 20.0$  Hz), 24.4 (d,  $J = 5.0$  Hz);

**$^{19}F$  NMR** (376 MHz,  $CDCl_3$ ):  $\delta$  -217.9 (tt,  $J = 48.1, 25.7$  Hz, 1F);

**HRMS** (ESI): Calc'd for  $C_{10}H_{19}FNO_3$   $[M+H]^+$ : 220.1343, found: 220.1351.

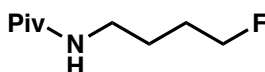

***N*-(4-Fluorobutyl)pivalamide (2d)**: The title compound was prepared according to the representative procedure using **1d**. Purification by preparative thin-layer chromatography (25% EtOAc/hexanes) provided the title compound (12.3 mg, 70%) as a white solid.

**Melting Point**: 67–69 °C;

**$^1H$  NMR** (600 MHz,  $CDCl_3$ ):  $\delta$  5.70 (br, 1H), 4.47 (dt,  $J = 47.2, 5.8$  Hz, 2H), 3.29 (t,  $J = 6.8$  Hz, 2H), 1.76–

1.61 (m, 4H), 1.19 (s, 9H);

$^{13}\text{C}$  NMR (151 MHz,  $\text{CDCl}_3$ ):  $\delta$  178.6, 83.9 (d,  $J = 164.6$  Hz), 39.1, 38.8, 27.9 (d,  $J = 19.9$  Hz), 27.7, 25.9 (d,  $J = 4.4$  Hz);

$^{19}\text{F}$  NMR (376 MHz,  $\text{CDCl}_3$ ):  $\delta$  -219.0 (tt,  $J = 47.4, 25.8$  Hz, 1F);

HRMS (ESI): Calc'd for  $\text{C}_9\text{H}_{19}\text{FNO}$   $[\text{M}+\text{H}]^+$ : 176.1445, found: 176.1442.

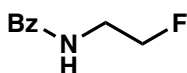

***N*-(2-Fluoroethyl) benzamide (2e)**: The title compound was prepared according to the representative procedure using **1e**. Purification by preparative thin-layer chromatography (50% EtOAc/hexanes) provided the title compound (6.7 mg, 40%) as a colorless oil.

$^1\text{H}$  NMR (400 MHz,  $\text{CDCl}_3$ ):  $\delta$  7.80 (d,  $J = 7.5$  Hz, 2H), 7.51 (t,  $J = 7.5$  Hz, 1H), 7.43 (t,  $J = 7.5$  Hz, 2H), 6.63 (br, 1H), 4.60 (dt,  $J = 47.4, 4.9$  Hz, 2H), 3.77 (dq,  $J = 28.3, 4.9$  Hz, 2H);

$^{13}\text{C}$  NMR (101 MHz,  $\text{CDCl}_3$ ):  $\delta$  167.8, 134.2, 131.8, 128.7, 127.1, 83.0 (d,  $J = 166.4$  Hz), 40.6 (d,  $J = 19.7$  Hz);

$^{19}\text{F}$  NMR (376 MHz,  $\text{CDCl}_3$ ):  $\delta$  -223.0 – -223.5 (m, 1F);

HRMS (ESI): Calc'd for  $\text{C}_9\text{H}_{11}\text{FNO}$   $[\text{M}+\text{H}]^+$ : 168.0819, found: 168.0825.

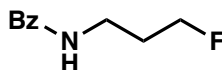

***N*-(3-Fluoropropyl) benzamide (2f)**: The title compound was prepared according to the representative procedure using **1f**. Purification by preparative thin-layer chromatography (50% EtOAc/hexanes) provided the title compound (6.0 mg, 33%) as a pale yellow waxy solid.

$^1\text{H}$  NMR (400 MHz,  $\text{CDCl}_3$ ):  $\delta$  7.76 (d,  $J = 6.9$  Hz, 2H), 7.51 (t,  $J = 6.9$  Hz, 1H), 7.43 (t,  $J = 6.9$  Hz, 2H), 6.44 (br, 1H), 4.61 (dt,  $J = 47.3, 6.0$  Hz, 2H), 3.63 (q,  $J = 6.0$  Hz, 2H), 2.04 (dq,  $J = 28.2, 6.0$  Hz, 2H);

$^{13}\text{C}$  NMR (101 MHz,  $\text{CDCl}_3$ ):  $\delta$  167.8, 134.6, 131.6, 128.7, 127.0, 83.0 (d,  $J = 163.9$  Hz), 37.4 (d,  $J = 4.1$  Hz), 30.3 (d,  $J = 19.2$  Hz);

$^{19}\text{F}$  NMR (376 MHz,  $\text{CDCl}_3$ ):  $\delta$  -218.9 – -219.3 (m, 1F);

HRMS (ESI): Calc'd for  $\text{C}_{10}\text{H}_{13}\text{FNO}$   $[\text{M}+\text{H}]^+$ : 182.0976, found: 182.0976.

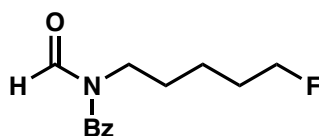

***N*-(5-Fluoropentyl)-*N*-formylbenzamide (2g)**: The title compound was prepared according to the representative procedure using **1g**. Purification by preparative thin-layer chromatography (50%

EtOAc/hexanes) provided the title compound (15.6 mg, 67%) as a colorless oil.

**<sup>1</sup>H NMR** (700 MHz, CDCl<sub>3</sub>): δ 8.92 (s, 1H), 7.57 (t, *J* = 7.5 Hz, 1H), 7.53 (d, *J* = 7.5 Hz, 2H), 7.49 (t, *J* = 7.5 Hz, 2H), 4.45 (dt, *J* = 47.3, 6.1 Hz, 2H), 3.88 (t, *J* = 7.5 Hz, 2H), δ 1.81–1.68 (m, 4H), 1.49 (quint, *J* = 7.5 Hz, 2H);

**<sup>13</sup>C NMR** (176 MHz, CDCl<sub>3</sub>): δ 172.5, 164.4, 133.7, 132.3, 129.1, 128.9, 83.9 (d, *J* = 164.7 Hz), 40.5, 30.1 (d, *J* = 19.8 Hz), 27.7, 22.8 (d, *J* = 5.3 Hz);

**<sup>19</sup>F NMR** (376 MHz, CDCl<sub>3</sub>): δ -217.9 (tt, *J* = 47.3, 25.5 Hz, 1F);

**HRMS** (ESI): Calc'd for C<sub>13</sub>H<sub>17</sub>FNO<sub>2</sub> [M+H]<sup>+</sup>: 238.1238, found: 238.1238.

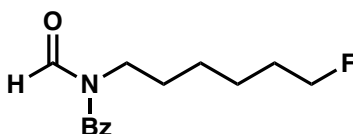

***N*-(6-Fluorohexyl)-*N*-formylbenzamide (2h)**: The title compound was prepared according to the representative procedure using **1h**. Purification by preparative thin-layer chromatography (50% EtOAc/hexanes) provided the title compound (12.4 mg, 49%) as a colorless oil.

**<sup>1</sup>H NMR** (700 MHz, CDCl<sub>3</sub>) δ 8.92 (s, 1H), 7.60 (t, *J* = 7.2 Hz, 1H), 7.53–7.48 (m, 4H), 4.47 (dt, *J* = 47.3, 6.0 Hz, 2H), 3.87 (t, *J* = 7.4 Hz, 2H), 1.73–1.63 (m, 4H), 1.47–1.41 (m, 4H);

**<sup>13</sup>C NMR** (176 MHz, CDCl<sub>3</sub>) δ 172.5, 164.4, 133.8, 132.3, 129.1, 128.9, 84.2 (d, *J* = 164.4 Hz), 40.6, 30.4 (d, *J* = 19.7 Hz), 28.0, 26.7, 25.0 (d, *J* = 5.2 Hz);

**<sup>19</sup>F NMR** (376 MHz, CDCl<sub>3</sub>): δ -217.5 (tt, *J* = 48.9, 24.5 Hz, 1F);

**HRMS** (ESI): Calc'd for C<sub>14</sub>H<sub>18</sub>FNO<sub>2</sub>Na [M+Na]<sup>+</sup>: 274.1214, found: 274.1216.

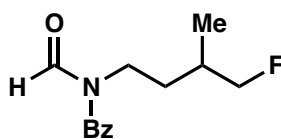

***N*-(4-Fluoro-3-methylbutyl)-*N*-formylbenzamide (2i)**: The title compound was prepared according to the representative procedure using **1i**. Purification by preparative thin-layer chromatography (50% EtOAc/hexanes) provided the title compound (14.0 mg, 59%) as a colorless oil.

**<sup>1</sup>H NMR** (400 MHz, CDCl<sub>3</sub>): δ 8.92 (s, 1H), 7.60–7.47 (m, 5H), 4.32 (ddd, *J* = 47.5, 8.9, 5.7 Hz, 1H), 4.29 (ddd, *J* = 47.5, 8.9, 5.9 Hz, 1H), 3.94 (t, *J* = 7.6 Hz, 2H), 1.98–1.77 (m, 2H), 1.58–1.47 (m, 1H), 1.05 (dd, *J* = 6.7, 0.9 Hz, 3H);

**<sup>13</sup>C NMR** (101 MHz, CDCl<sub>3</sub>): δ 172.4, 164.3, 133.7, 132.4, 129.1, 128.9, 88.0 (d, *J* = 169.7 Hz), 38.8, 32.4 (d, *J* = 18.5 Hz), 31.1 (d, *J* = 5.1 Hz), 15.8 (d, *J* = 6.8 Hz);

**<sup>19</sup>F NMR** (376 MHz, CDCl<sub>3</sub>): δ -221.2 (td, *J* = 47.4, 19.4 Hz, 1F);

**HRMS** (ESI): Calc'd for C<sub>12</sub>H<sub>16</sub>FNONa [M-CO+Na]<sup>+</sup>: 232.1108, found: 232.1107.

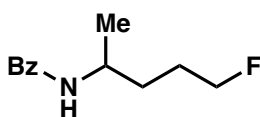

***N*-(5-Fluoropentan-2-yl)benzamide (2j)**: The title compound was prepared according to the representative procedure using **1j**. Purification by preparative thin-layer chromatography (50% EtOAc/hexanes) provided the title compound (17.0 mg, 81%) as a colorless oil.

**<sup>1</sup>H NMR** (400 MHz, CDCl<sub>3</sub>): δ 7.75 (d, *J* = 7.3 Hz, 2H), 7.49 (t, *J* = 7.3 Hz, 1H), 7.42 (d, *J* = 7.3 Hz, 2H), 5.96 (br, 1H), 4.47 (dddd, *J* = 47.2, 9.0, 6.4, 3.7 Hz, 2H), 4.26 (hept, *J* = 6.6 Hz, 1H), 1.86–1.60 (m, 4H), 1.27 (d, *J* = 6.6 Hz, 3H);

**<sup>13</sup>C NMR** (101 MHz, CDCl<sub>3</sub>): δ 167.1, 134.9, 131.5, 128.7, 126.9, 83.9 (d, *J* = 164.8 Hz), 45.5, 33.0 (d, *J* = 4.3 Hz), 27.3 (d, *J* = 19.9 Hz), 21.3;

**<sup>19</sup>F NMR** (376 MHz, CDCl<sub>3</sub>): δ -217.6 – -218.0 (m, 1F);

**HRMS** (ESI): Calc'd for C<sub>12</sub>H<sub>16</sub>FNONa [M+Na]<sup>+</sup>: 232.1108, found: 232.1111.

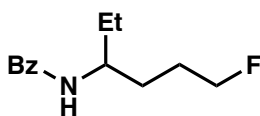

***N*-(6-Fluorohexan-3-yl) benzamide (2k)**: The title compound was prepared according to the representative procedure using **1k**. Purification by preparative thin-layer chromatography (50% EtOAc/hexanes) provided the title compound (19.0 mg, 85%) as a colorless oil.

**<sup>1</sup>H NMR** (700 MHz, CDCl<sub>3</sub>): δ 7.75 (d, *J* = 7.4 Hz, 2H), 7.49 (t, *J* = 7.4 Hz, 1H), 7.42 (t, *J* = 7.4 Hz, 2H), 5.92 (br, 1H), 4.53–4.41 (m, 2H), 4.11 (ddq, *J* = 13.6, 8.9, 4.9 Hz, 1H), 1.85–1.72 (m, 3H), 1.70–1.64 (m, 1H), 1.60–1.49 (m, 2H), 0.97 (t, *J* = 7.4 Hz, 3H);

**<sup>13</sup>C NMR** (151 MHz, CDCl<sub>3</sub>): δ 167.6, 134.9, 131.5, 128.7, 126.9, 84.0 (d, *J* = 164.7 Hz), 50.8, 30.9 (d, *J* = 4.4 Hz), 28.4, 27.2 (d, *J* = 19.8 Hz), 10.5;

**<sup>19</sup>F NMR** (376 MHz, CDCl<sub>3</sub>): δ -217.8 – -218.2 (m, 1F);

**HRMS** (ESI): Calc'd for C<sub>13</sub>H<sub>19</sub>FNO [M+H]<sup>+</sup>: 224.1445, found: 224.1450.

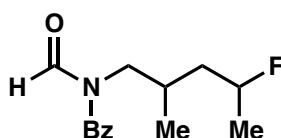

***N*-(4-Fluoro-2-methylpentyl)-*N*-formylbenzamide (2l)**: The title compound was prepared according to the representative procedure using **1l**. Purification by preparative thin-layer chromatography (50% EtOAc/hexanes) provided the title compound (12.6 mg, 50%) as a colorless oil as a 1:1 mixture of



diastereomers.

**<sup>1</sup>H NMR** (400 MHz, CDCl<sub>3</sub>): (400 MHz, 1H), 8.95 (s, 1H), 7.59–7.47 (m, 10H), 4.91–4.68 (m, 2H), 3.88–3.74 (m, 4H), 2.25–2.10 (m, 2H), 1.80–1.49 (m, 3H), 1.42–1.26 (m, 1H), 1.34 (dd, *J* = 23.7, 6.1 Hz, 3H), 1.33 (dd, *J* = 23.7, 6.1 Hz, 3H), 1.00 (d, *J* = 6.6 Hz, 3H), 0.99 (d, *J* = 6.6 Hz, 3H);

**<sup>13</sup>C NMR** (101 MHz, CDCl<sub>3</sub>): δ 172.7 (2C), 164.7, 164.6, 133.84, 133.79, 132.4, 132.3, 129.14, 129.13, 128.94, 128.92, 89.6 (d, *J* = 164.6 Hz), 88.7 (d, *J* = 165.0 Hz), 46.0, 45.8, 41.90 (d, *J* = 20.7 Hz), 41.86 (d, *J* = 20.6 Hz), 29.7 (d, *J* = 4.0 Hz), 29.1 (d, *J* = 2.9 Hz), 21.8 (d, *J* = 22.6 Hz), 21.4 (d, *J* = 22.8 Hz), 18.3, 17.6;

**<sup>19</sup>F NMR** (376 MHz, CDCl<sub>3</sub>): δ -169.8 – -170.3 (m, 1F), -172.6 – -173.1 (m, 1F);

**HRMS** (ESI): Calc'd for C<sub>14</sub>H<sub>18</sub>FNO<sub>2</sub>Na [M+Na]<sup>+</sup>: 274.1214, found: 274.1212.

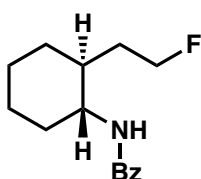

***trans*-N-(2-(2-Fluoroethyl)cyclohexyl)benzamide (2m)**: The title compound was prepared according to the representative procedure using **1m**. Purification by preparative thin-layer chromatography (50% EtOAc/hexanes) provided the title compound (10.7 mg, 43%) as a colorless oil.

**<sup>1</sup>H NMR** (400 MHz, CDCl<sub>3</sub>): δ 7.76 (d, *J* = 7.3 Hz, 2H), 7.50 (t, *J* = 7.3 Hz, 1H), 7.44 (t, *J* = 7.3 Hz, 2H), 5.92 (br, 1H), 4.52 (ddd, *J* = 47.4, 7.2, 3.7 Hz, 2H), 3.83 (dq, *J* = 10.6, 3.9 Hz, 1H), 2.16–2.05 (m, 2H), 2.00–1.96 (m, 1H), 1.81–1.74 (m, 2H), 1.63–1.09 (m, 6H);

**<sup>13</sup>C NMR** (151 MHz, CDCl<sub>3</sub>): δ 167.2, 135.0, 131.5, 128.7, 127.0, 82.4 (d, *J* = 163.6 Hz), 53.0, 40.1 (d, *J* = 3.3 Hz), 34.2, 33.8 (d, *J* = 19.5 Hz), 31.6, 25.7, 25.4;

**<sup>19</sup>F NMR** (400 MHz, CDCl<sub>3</sub>): δ -217.5 – -217.9 (m, 1F);

**HRMS** (ESI): Calc'd for C<sub>15</sub>H<sub>21</sub>FNO [M+H]<sup>+</sup>: 250.1602, found: 250.1595.

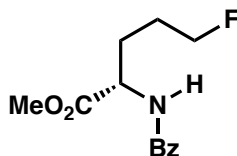

**Methyl (*S*)-2-Benzamido-5-fluoropentanoate (2n)**: The title compound was prepared according to the representative procedure using **1n**. Purification by preparative thin-layer chromatography (25% EtOAc/hexanes) provided the title compound (17.2 mg, 68%) as a white solid.

**Melting Point**: 63–65 °C;

**Optical Rotation**: [α]<sub>D</sub><sup>22</sup> = +17 (*c* 0.67, CHCl<sub>3</sub>);

**<sup>1</sup>H NMR** (600 MHz, CDCl<sub>3</sub>): δ 7.80 (d, *J* = 7.4 Hz, 2H), 7.52 (t, *J* = 7.4 Hz, 1H), 7.44 (t, *J* = 7.4 Hz, 2H), 6.78 (d, *J* = 7.4 Hz, 1H), 4.87 (dt, *J* = 7.4, 5.3 Hz, 1H), 4.54–4.41 (m, 2H), 3.79 (s, 3H), 2.16–2.10 (m, 1H),

1.95–1.89 (m, 1H), 1.88–1.72 (m, 2H);

$^{13}\text{C}$  NMR (151 MHz,  $\text{CDCl}_3$ ):  $\delta$  172.9, 167.2, 133.9, 132.0, 128.8, 127.2, 83.4 (d,  $J = 165.5$  Hz), 52.7, 52.2, 28.9 (d,  $J = 4.7$  Hz), 26.6 (d,  $J = 20.2$  Hz);

$^{19}\text{F}$  NMR (376 MHz,  $\text{CDCl}_3$ ):  $\delta$  -218.4 (tt,  $J = 47.3, 25.7$  Hz, 1F);

HRMS (ESI): Calc'd for  $\text{C}_{13}\text{H}_{17}\text{FNO}_3$   $[\text{M}+\text{H}]^+$ : 254.1187, found: 254.1185.

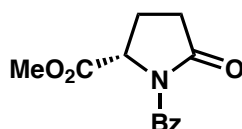

**Methyl (S)-1-Benzoyl-5-oxopyrrolidine-2-carboxylate (1o):** The title compound was prepared according to the representative procedure using **1o**. Purification by preparative thin-layer chromatography (50% EtOAc/hexanes) provided the title compound (11.4 mg, 46% yield). Spectroscopic data is fully consistent with previously reported data (60).

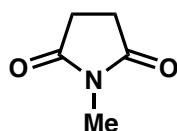

**1-Methylpyrrolidine-2,5-dione (1p):** The title compound was prepared according to the representative procedure using **1p**. Purification by preparative thin-layer chromatography (50% EtOAc/hexanes) provided the title compound (9.2 mg, 81% yield). Spectroscopic data is fully consistent with previously reported data (10).

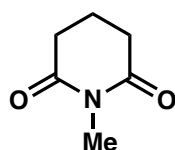

**1-Methylpiperidine-2,6-dione (1q):** The title compound was prepared according to the representative procedure using **1p**. Purification by preparative thin-layer chromatography (50% EtOAc/hexanes) provided the title compound (7.1 mg, 56% yield). Spectroscopic data is fully consistent with previously reported data (10).

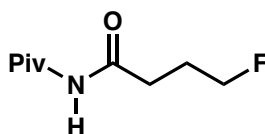

**4-Fluoro-N-pivaloylbutanamidebenzamide (2r):** The title compound was prepared according to the representative procedure using **1r**. Purification by preparative thin-layer chromatography (30%

EtOAc/hexanes) provided the title compound (8.1 mg, 43% yield) as a white solid.

**Melting Point:** 63–65 °C;

**<sup>1</sup>H NMR** (600 MHz, CDCl<sub>3</sub>): δ 8.07 (br, 1H), 4.51 (dt, *J* = 47.2, 5.9 Hz, 2H), 3.01 (t, *J* = 7.2 Hz, 2H), 2.05 (ddd, *J* = 25.8, 7.2, 5.9 Hz, 2H), 1.25 (s, 9H);

**<sup>13</sup>C NMR** (151 MHz, CDCl<sub>3</sub>): δ 177.2, 175.3, 83.2 (d, *J* = 165.1 Hz), 40.2, 33.4 (d, *J* = 5.2 Hz), 27.2, 25.0 (d, *J* = 20.3 Hz);

**<sup>19</sup>F NMR** (376 MHz, CDCl<sub>3</sub>): δ -219.1 (tt, *J* = 47.2, 25.8 Hz, 1F);

**HRMS** (ESI): Calc'd for C<sub>9</sub>H<sub>17</sub>FNO<sub>2</sub> [M+H]<sup>+</sup>: 190.1238, found: 190.1245.

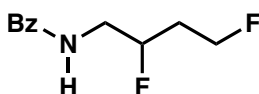

***N*-(2,4-Difluorobutyl)benzamide (2s):** The title compound was prepared according to the representative procedure using **1s**. Purification by preparative thin-layer chromatography (50% EtOAc/hexanes) provided the title compound (6.0 mg, 28% yield) as a waxy white solid.

**<sup>1</sup>H NMR** (400 MHz, CDCl<sub>3</sub>): δ 7.79 (d, *J* = 7.3 Hz, 2H), 7.52 (t, *J* = 7.3 Hz, 1H), 7.45 (t, *J* = 7.3 Hz, 2H), 6.52 (br, 1H), 4.90 (dtt, *J* = 48.4, 7.2, 3.6 Hz, 1H), 4.62 (dt, *J* = 47.3, 5.9 Hz, 2H), 3.89 (dddd, *J* = 28.2, 14.7, 6.6, 3.0 Hz, 1H), 3.66–3.54 (m, 1H), 2.20–1.93 (m, 2H);

**<sup>13</sup>C NMR** (101 MHz, CDCl<sub>3</sub>): δ 167.8, 134.1, 131.9, 128.8, 127.1, 89.8 (dd, *J* = 169.6, 3.6 Hz), 79.7 (dd, *J* = 165.6, 5.1 Hz), 43.6 (d, *J* = 20.1 Hz), 33.5 (t, *J* = 20.1 Hz);

**<sup>19</sup>F NMR** (376 MHz, CDCl<sub>3</sub>): δ -188.7 – -189.1 (m, 1F), -220.3 – -220.7 (m, 1F);

**HRMS** (ESI): Calc'd for C<sub>11</sub>H<sub>14</sub>F<sub>2</sub>NO [M+H]<sup>+</sup>: 214.1038, found: 214.1038.

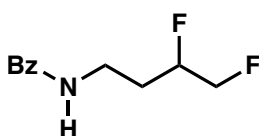

***N*-(3,4-Difluorobutyl)benzamide (2t):** The title compound was prepared according to the representative procedure using **1t**. Purification by preparative thin-layer chromatography (50% EtOAc/hexanes) provided the title compound (4.7 mg, 22% yield) as a waxy white solid.

**<sup>1</sup>H NMR** (700 MHz, CDCl<sub>3</sub>) 7.78 (d, *J* = 7.4 Hz, 2H), 7.52 (t, *J* = 7.4 Hz, 1H), 7.46–7.41 (m, 2H), 6.45 (br, 1H), 4.98–4.74 (m, 1H), 4.69–4.41 (m, 2H), 3.73–3.62 (m, 2H), 2.14–1.98 (m, 2H);

**<sup>13</sup>C NMR** (176 MHz, CDCl<sub>3</sub>) δ 167.9, 134.4, 131.8, 128.8, 127.0, 90.8 (dd, *J* = 172.6, 19.7 Hz), 84.0 (dd, *J* = 174.5, 22.4 Hz), 36.5 (d, *J* = 4.3 Hz), 36.5 (dd, *J* = 20.2, 6.0 Hz);

**<sup>19</sup>F NMR** (376 MHz, CDCl<sub>3</sub>): δ -189.5 – -190.0 (m, 1F), -229.4 – -229.8 (m, 1F);

**HRMS** (ESI): Calc'd for C<sub>11</sub>H<sub>14</sub>F<sub>2</sub>NO [M+H]<sup>+</sup>: 214.1038, found: 214.1038.

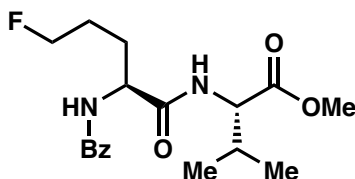

**Methyl ((*S*)-2-Benzamido-5-fluoropentanoyl)-*L*-valinate (4a):** The title compound was prepared according to the representative procedure using **3a** with the following modifications: reaction time of 15 h at room temperature. Purification by preparative thin-layer chromatography (20% to 50% EtOAc/hexanes) provided the title compound (17.5 mg, 50% yield) as a white amorphous solid along with recovered **3a** (8.7 mg, 25%).

**Optical Rotation:**  $[\alpha]_D^{22} = -13$  ( $c$  0.47,  $\text{CHCl}_3$ );

**$^1\text{H}$  NMR** (600 MHz,  $\text{CDCl}_3$ ):  $\delta$  7.80 (d,  $J = 7.4$  Hz, 2H), 7.50 (t,  $J = 7.4$  Hz, 1H), 7.80 (t,  $J = 7.4$  Hz, 2H), 7.04 (d,  $J = 8.3$  Hz, 1H), 6.89 (d,  $J = 8.5$  Hz, 1H), 4.84 (q,  $J = 8.5$  Hz, 1H), 4.51 (dd,  $J = 8.3, 5.0$  Hz, 1H), 4.50 (dt,  $J = 47.4, 5.7$  Hz, 2H), 3.75 (s, 3H), 2.21–2.14 (m, 1H), 2.09 (ddt,  $J = 13.4, 9.4, 6.1$  Hz, 1H), 1.97–1.76 (m, 3H), 0.90 (d,  $J = 6.9$  Hz, 3H), 0.88 (d,  $J = 6.9$  Hz, 3H);

**$^{13}\text{C}$  NMR** (151 MHz,  $\text{CDCl}_3$ ):  $\delta$  172.1, 171.6, 167.5, 133.8, 132.0, 128.7, 127.2, 83.9 (d,  $J = 164.8$  Hz), 57.6, 53.0, 52.3, 31.1, 29.1 (d,  $J = 4.1$  Hz), 26.6 (d,  $J = 20.0$  Hz), 19.1, 17.8;

**$^{19}\text{F}$  NMR** (376 MHz,  $\text{CDCl}_3$ ):  $\delta$  -217.1 – -217.5 (m, 1F);

**HRMS** (ESI): Calc'd for  $\text{C}_{18}\text{H}_{25}\text{FN}_2\text{O}_4\text{Na}$   $[\text{M}+\text{Na}]^+$ : 375.1691, found: 375.1692.

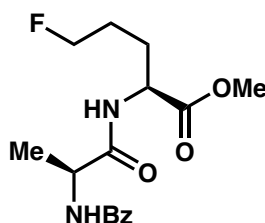

**Methyl (*S*)-2-((*S*)-2-Benzamidopropanamido)-5-fluoropentanoate (4b):** The title compound was prepared according to the representative procedure using **3b** with the following modifications: reaction time of 15 h at room temperature. Purification by preparative thin-layer chromatography (20% to 50% EtOAc/hexanes) provided the title compound (12.3 mg, 38% yield) as a white amorphous solid along with recovered **3b** (12.7 mg, 40%).

**Optical Rotation:**  $[\alpha]_D^{22} = +7.1$  ( $c$  0.63,  $\text{CHCl}_3$ );

**$^1\text{H}$  NMR** (600 MHz,  $\text{CDCl}_3$ , *ca.* 1:1 mixture of rotamers):  $\delta$  7.81–7.79 (m, 2H), 7.52–7.49 (m, 1H), 7.45–7.40 (m, 2H), 7.33 (d,  $J = 7.9$  Hz, 0.5H), 7.23 (d,  $J = 7.9$  Hz, 0.5H), 7.09 (d,  $J = 7.3$  Hz, 1H), 4.83 (dq,  $J = 14.3, 7.3$  Hz, 1H), 4.63–4.59 (m, 1H), 4.49–4.47 (m, 0.5H), 4.42–4.39 (m, 1H), 4.34–4.32 (m, 0.5H), 3.75 (s, 1.5H), 3.68 (s, 1.5H), 2.03–1.98 (m, 1H), 1.86–1.66 (m, 3H), 1.495 (d,  $J = 7.0$  Hz, 1.5H), 1.491 (d,  $J = 7.0$  Hz, 1.5H);

**$^{13}\text{C}$  NMR** (151 MHz,  $\text{CDCl}_3$ , mixture of rotamers):  $\delta$  172.6, 172.5, 172.4, 172.3, 167.5, 167.4, 133.9 (2C), 131.9 (2C), 128.7 (2C), 127.23, 127.20, 82.23 (d,  $J = 165.7$  Hz), 82.20 (d,  $J = 165.7$  Hz), 52.61, 52.58, 52.1,

52.0, 49.29, 49.26, 28.33 (d,  $J = 4.7$  Hz), 28.30 (d,  $J = 4.7$  Hz), 26.61 (d,  $J = 20.2$  Hz), 26.55 (d,  $J = 20.2$  Hz), 18.7, 18.6;

$^{19}\text{F}$  NMR (376 MHz,  $\text{CDCl}_3$ ):  $\delta$  -218.4 – -218.9 (m, 1F);

HRMS (ESI): Calc'd for  $\text{C}_{16}\text{H}_{21}\text{FN}_2\text{O}_4\text{Na}$   $[\text{M}+\text{Na}]^+$ : 347.1378, found: 347.1379.

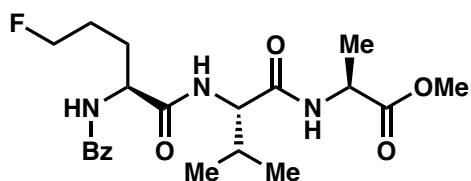

**Methyl ((S)-2-Benzamido-5-fluoropentanoyl)-L-valyl-L-alaninate (4c):** The title compound was prepared according to the representative procedure using **3c** with the following modifications: reaction time of 15 h at room temperature. Purification by preparative thin-layer chromatography (5% MeOH/ $\text{CH}_2\text{Cl}_2$ ) provided the title compound (16.5 mg, 39% yield) as a white amorphous solid along with recovered **3c** (10.4 mg, 25%).

**Optical Rotation:**  $[\alpha]_D^{22} = -41$  ( $c$  0.39, MeOH);

$^1\text{H}$  NMR (700 MHz,  $\text{CD}_3\text{OD}$ ):  $\delta$  7.85–7.84 (m, 2H), 7.55–7.53 (m, 1H), 7.47–7.45 (m, 2H), 4.64 (dt,  $J = 8.8, 4.7$  Hz, 1H), 4.47 (d,  $J = 47.6$  Hz, 2H), 4.39 (dt,  $J = 13.5, 6.7$  Hz, 1H), 4.24 (dd,  $J = 6.6, 4.2$  Hz, 1H), 3.69 (s, 3H), 2.08 (dt,  $J = 12.1, 5.5$  Hz, 1H), 2.01 (tt,  $J = 10.4, 5.3$  Hz, 1H), 1.90–1.77 (m, 3H), 1.39 (br s, 3H), 0.99 (br s, 9H);

$^{13}\text{C}$  NMR (176 MHz,  $\text{CD}_3\text{OD}$ ):  $\delta$  174.4, 174.2, 173.3, 170.5, 135.2, 132.9, 129.6, 128.5, 84.4 (d,  $J = 164.3$  Hz), 59.8, 55.0, 52.6, 49.4, 32.3, 28.9 (d,  $J = 5.3$  Hz), 28.3 (d,  $J = 20.0$  Hz), 19.6, 18.6, 17.3;

$^{19}\text{F}$  NMR (376 MHz,  $\text{CD}_3\text{OD}$ ):  $\delta$  -219.7 (tt,  $J = 47.7, 24.8$  Hz, 1F);

HRMS (ESI): Calc'd for  $\text{C}_{21}\text{H}_{30}\text{FN}_3\text{O}_5\text{Na}$   $[\text{M}+\text{Na}]^+$ : 446.2062, found: 446.2060.

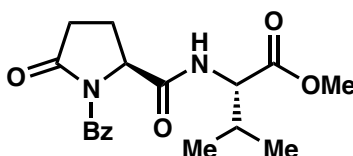

**Methyl ((S)-1-Benzoyl-5-oxopyrrolidine-2-carbonyl)-L-valinate (4d):** The title compound was prepared according to the representative procedure using **3d** with the following modifications: 0.2 mmol scale with a reaction time of 15 h at room temperature. Purification by preparative thin-layer chromatography (20% to 50% EtOAc/hexanes) provided the title compound (52.6 mg, 76% yield) as a white solid.

**Melting Point:** 155–158 °C;

**Optical Rotation:**  $[\alpha]_D^{22} = -256$  ( $c$  0.46,  $\text{CHCl}_3$ );

$^1\text{H}$  NMR (600 MHz,  $\text{CDCl}_3$ ):  $\delta$  7.62–7.61 (m, 2H), 7.52–7.48 (m, 1H), 7.40 (t,  $J = 7.8$  Hz, 2H), 4.83 (dd,  $J = 8.3, 3.6$  Hz, 1H), 4.57 (dd,  $J = 8.9, 4.8$  Hz, 1H), 3.75 (s, 3H), 2.89–2.83 (m, 1H), 2.53 (ddd,  $J = 17.8, 9.1, 4.3$  Hz, 1H), 2.36–2.25 (m, 2H), 2.23–2.17 (m, 1H), 0.95 (d,  $J = 6.9$  Hz, 3H), 0.93 (d,  $J = 6.9$  Hz, 3H);

$^{13}\text{C}$  NMR (151 MHz,  $\text{CDCl}_3$ ):  $\delta$  174.1, 172.4, 170.9, 170.4, 134.0, 132.2, 129.0, 128.0, 60.0, 57.5, 52.4, 32.1, 31.4, 22.2, 19.0, 17.8;

HRMS (ESI): Calc'd for  $\text{C}_{18}\text{H}_{23}\text{N}_2\text{O}_5$   $[\text{M}+\text{H}]^+$ : 347.1601, found: 347.1599.

### 3.2. Representative Procedure for the Silver-Mediated Difluorination of Enamides

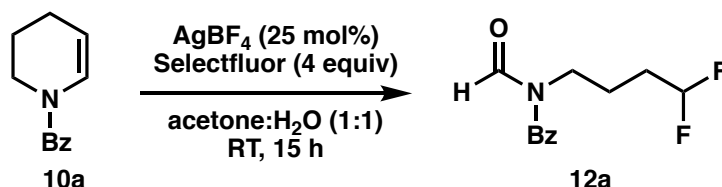

To a 1-dram vial containing a solution of **10a** (18.7 mg, 0.100 mmol) in 1:1 acetone:  $\text{H}_2\text{O}$  (0.5 mL) was added Selectfluor<sup>®</sup> (142 mg, 0.400 mmol) followed by  $\text{AgBF}_4$  (4.9 mg, 0.025 mmol). The resulting mixture was stirred at room temperature. After 15 h, the reaction mixture was partitioned with EtOAc (0.5 mL) and  $\text{H}_2\text{O}$  (0.5 mL) and the phases were separated. The aqueous phase was extracted with EtOAc (1.5 mL  $\times$  3) and the combined organic layers were concentrated under reduced pressure. The crude residue was purified by preparative thin-layer chromatography (25% EtOAc/hexanes) to provide *N*-(4,4-difluorobutyl)-*N*-formylbenzamide (**12a**) (18.7 mg, 78%) as a colorless oil.

$^1\text{H}$  NMR (600 MHz,  $\text{CDCl}_3$ ):  $\delta$  8.93 (s, 1H), 7.59 (d,  $J = 7.1$  Hz, 1H), 7.54–7.49 (m, 4H), 5.87 (tt,  $J = 56.5$ , 4.2 Hz, 1H), 3.93 (t,  $J = 7.2$  Hz, 2H), 1.96–1.82 (m, 4H);

$^{13}\text{C}$  NMR (151 MHz,  $\text{CDCl}_3$ ):  $\delta$  178.6, 83.9 (d,  $J = 164.6$  Hz), 39.1, 38.8, 27.9 (d,  $J = 19.9$  Hz), 27.7, 25.9 (d,  $J = 4.4$  Hz)  $^{13}\text{C}$  NMR (151 MHz,  $\text{CDCl}_3$ )  $\delta$  172.4, 164.3, 133.5, 132.5, 129.2, 128.9, 116.8 (t,  $J = 239.2$  Hz), 39.9, 31.8 (t,  $J = 21.5$  Hz), 20.9 (t,  $J = 5.5$  Hz);

$^{19}\text{F}$  NMR (376 MHz,  $\text{CDCl}_3$ ):  $\delta$  -115.3 (dt,  $J = 56.5$ , 16.9 Hz, 2F);

HRMS (ESI): Calc'd for  $\text{C}_{11}\text{H}_{14}\text{F}_2\text{NO}$   $[\text{M}-\text{CO}+\text{H}]^+$ : 214.1038, found: 214.1038.

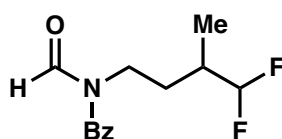

*N*-(4,4-Difluoro-3-methylbutyl)-*N*-formylbenzamide (**12b**): The title compound was prepared according to the representative procedure using **10b**. Purification by preparative thin-layer chromatography (20% EtOAc/hexanes) provided the title compound (13.9 mg, 54%) as a colorless oil.

$^1\text{H}$  NMR (500 MHz,  $\text{CDCl}_3$ ):  $\delta$  8.93 (s, 1H), 7.58 (t,  $J = 6.9$  Hz, 1H), 7.54–7.48 (m, 4H), 5.68 (td,  $J = 56.7$ , 3.5 Hz, 1H), 3.94 (t,  $J = 7.5$  Hz, 2H), 2.01–1.90 (m, 2H), 1.59–1.53 (m, 1H), 1.11 (d,  $J = 6.9$  Hz, 3H);

$^{13}\text{C}$  NMR (126 MHz,  $\text{CDCl}_3$ ):  $\delta$  172.4, 164.3, 133.5, 132.5, 129.2, 128.9, 118.8 (t,  $J = 242.5$  Hz), 38.4, 35.7 (t,  $J = 19.9$  Hz), 28.3 (t,  $J = 4.4$  Hz), 12.6 (t,  $J = 5.2$  Hz);

$^{19}\text{F}$  NMR (376 MHz,  $\text{CDCl}_3$ ):  $\delta$  -122.4 (ddd,  $J = 56.6$ , 29.6, 14.7 Hz, 2F);

**HRMS** (ESI): Calc'd for C<sub>13</sub>H<sub>16</sub>F<sub>2</sub>NO [M-CO+H]<sup>+</sup>: 256.1144, found: 256.1143.

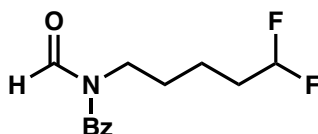

***N*-(5,5-Difluoropentyl)-*N*-formylbenzamide (12c)**: The title compound was prepared according to the representative procedure using **10c**. Purification by preparative thin-layer chromatography (20% EtOAc/hexanes) provided the title compound (15.6 mg, 61%) as a colorless oil.

**<sup>1</sup>H NMR** (500 MHz, CDCl<sub>3</sub>): δ 8.92 (s, 1H), 7.59–7.56 (m, 1H), 7.53–7.48 (m, 4H), 5.82 (tt, *J* = 56.8, 4.4 Hz, 1H), 3.88 (t, *J* = 7.4 Hz, 2H), 1.95–1.83 (m, 2H), 1.72 (quint, *J* = 7.4 Hz, 2H), 1.53 (quint, *J* = 7.4 Hz, 2H);

**<sup>13</sup>C NMR** (126 MHz, CDCl<sub>3</sub>): δ 172.5, 164.4, 133.6, 132.4, 129.1, 128.9, 117.1 (t, *J* = 238.8 Hz), 40.2, 33.7 (t, *J* = 21.0 Hz), 27.5, 19.6 (t, *J* = 5.6 Hz);

**<sup>19</sup>F NMR** (376 MHz, CDCl<sub>3</sub>): δ -115.3 (dt, *J* = 56.7, 17.5 Hz, 2F);

**HRMS** (EI): Calc'd for C<sub>13</sub>H<sub>15</sub>F<sub>2</sub>NO<sub>2</sub> [M]<sup>+</sup>: 255.1065, found: 255.1070.

#### 4. Mechanistic Studies

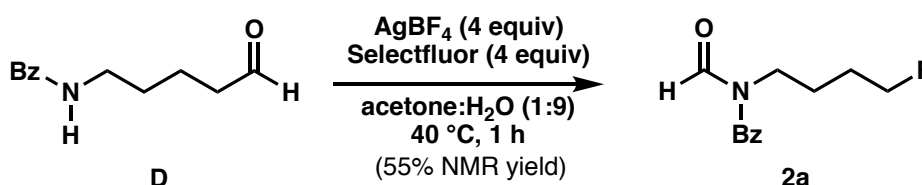

According to the representative procedure, aldehyde **D** (**6l**) was used as a starting material. Triphenylmethane was used as an internal standard and <sup>1</sup>H NMR analysis showed the formation of **2a** in 55% yield.

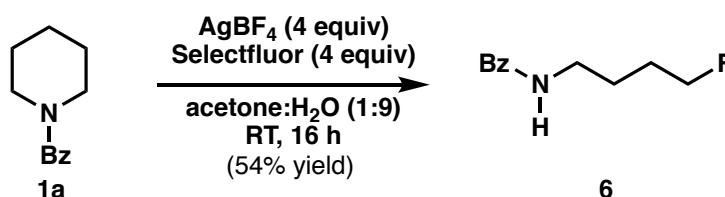

To a 1-dram vial containing **1a** (94.5 mg, 0.5 mmol), AgBF<sub>4</sub> (390 mg, 2.00 mmol) and Selectfluor<sup>®</sup> (710 mg, 2.00 mmol) was added 1:9 acetone: H<sub>2</sub>O (2.5 mL), and the resulting mixture was stirred at room temperature. After 16 h, the reaction mixture was partitioned with EtOAc (2.5 mL) and H<sub>2</sub>O (0.5 mL) and the phases were separated. The aqueous phase was extracted with EtOAc (5.0 mL × 3) and the combined organic layers were concentrated under reduced pressure. The crude residue was purified by preparative thin-layer chromatography (50% EtOAc/hexanes) to provide *N*-(4-fluorobutyl)benzamide (**6**) (52.7 mg, 54%) as a waxy white solid.

$^1\text{H}$  NMR (700 MHz,  $\text{CDCl}_3$ ):  $\delta$  7.76 (d,  $J = 7.5$  Hz, 2H), 7.49 (t,  $J = 7.5$  Hz, 1H), 7.42 (t,  $J = 7.5$  Hz, 2H), 6.31 (br, 1H), 4.50 (dt,  $J = 46.9, 5.6$  Hz, 2H), 3.51 (q,  $J = 6.5$  Hz, 2H), 1.86–1.72 (m, 4H);

$^{13}\text{C}$  NMR (176 MHz,  $\text{CDCl}_3$ ):  $\delta$  167.6, 134.6, 131.4, 128.5, 126.8, 83.7 (d,  $J = 164.7$  Hz), 39.5, 27.8 (d,  $J = 19.9$  Hz), 25.7 (d,  $J = 4.4$  Hz);

$^{19}\text{F}$  NMR (376 MHz,  $\text{CDCl}_3$ ):  $\delta$  -217.4 (tt,  $J = 47.5, 26.2$  Hz, 1F);

HRMS (ESI): Calc'd for  $\text{C}_{11}\text{H}_{14}\text{FNONa}$  [ $\text{M}+\text{Na}$ ] $^+$ : 218.0952, found: 218.0952.

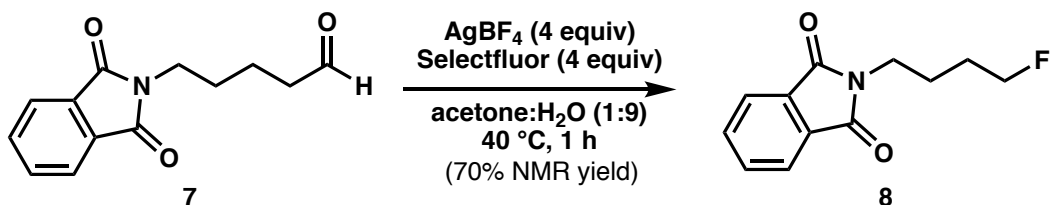

According to the representative procedure, aldehyde **7** (*62*) was used as a starting material. Triphenylmethane was used as an internal standard and  $^1\text{H}$  NMR analysis showed the formation of **8** (*63*) in 70% yield.

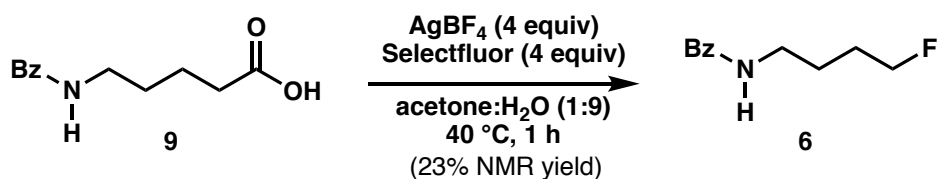

According to the representative procedure, carboxylic acid **9** (*10*) was used as a starting material. Triphenylmethane was used as an internal standard and  $^1\text{H}$  NMR analysis showed the formation of **6** in 23% yield.



## 5. Electrochemical Measurement

Non-aqueous electrochemical experiments were conducted under an Ar atmosphere in 0.1 M  $\text{NBu}_4\text{PF}_6$  electrolyte in acetonitrile. Cyclic voltammetry experiments were performed using an Epsilon potentiostat from Bioanalytical Systems, Inc. The working electrode was a 3.0 mm diameter glassy carbon disk (from Bioanalytical Systems, Inc.) and was polished between every scan with 0.05-micron alumina powder on a felt pad. The counter electrode was a platinum wire. A silver wire in porous Vycor tip glass tube filled with 0.1 M  $\text{NBu}_4\text{PF}_6$  in acetonitrile was used as a pseudo-reference electrode. At the conclusion of the series of experiments, the pseudo-reference potentials were referenced against ferrocene/ferrocenium as an external standard. The scan rate for all cyclic voltammograms was 100 mV/sec unless otherwise noted. All scans were compensated for internal resistance. Data measured with respect to  $\text{Fc}/\text{Fc}^+$  and reported to SCE.

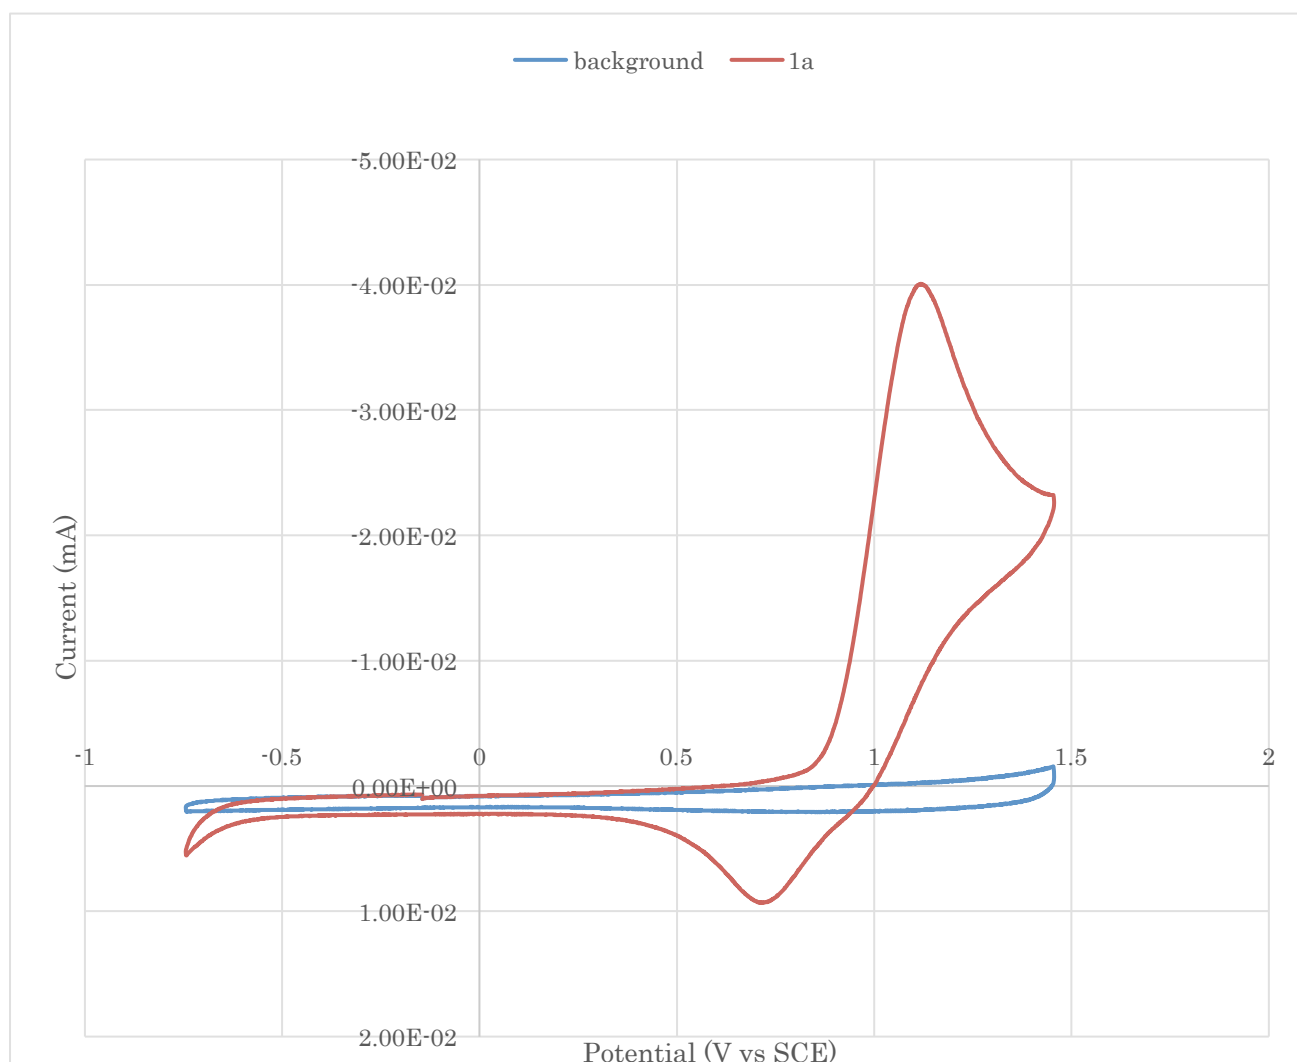

**Fig. S1**, Cyclic voltammograms of **1a** (1mM) and Ar background in 0.10 M  $\text{NBu}_4\text{PF}_6$  in acetonitrile. Data was collected with a scan rate of 100mV/s.

## 6. NMR Studies

### 6.1. Interaction of AgBF<sub>4</sub> with Selectfluor<sup>®</sup>

**Procedure:** To a 4 ml vial containing Selectfluor<sup>®</sup> (35.4 mg, 0.100 mmol) and AgBF<sub>4</sub> (19.4 mg, 0.100 mmol) was added 1:9 (v/v) Acetone-*d*<sub>6</sub>/D<sub>2</sub>O (1.0 ml). The resulting solution was allowed to stir at 40 °C for 1 h. The contents of the reaction vial were then transferred into a NMR tube and an NMR spectrum was taken directly afterwards to measure consumption of Selectfluor<sup>®</sup>.

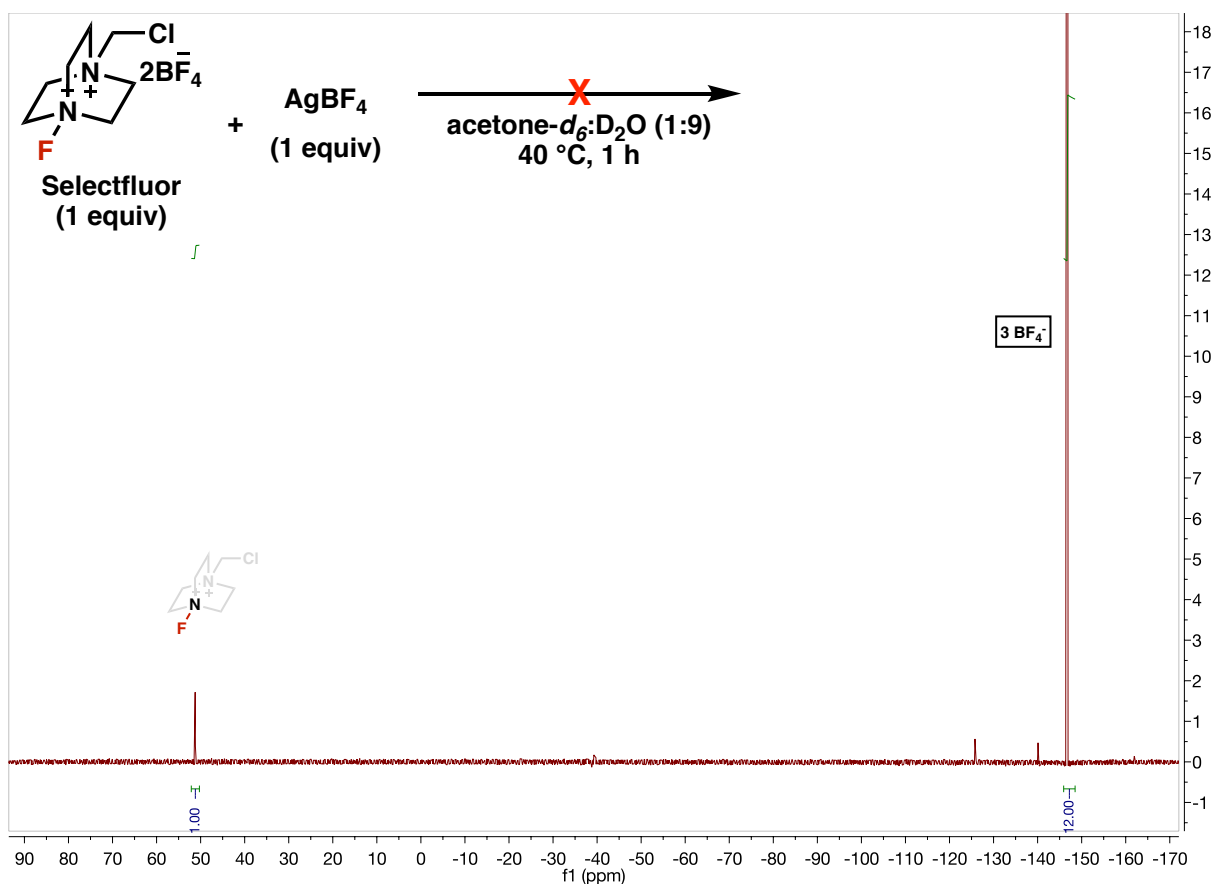

**Fig. S2.** <sup>19</sup>F NMR monitoring of Selectfluor<sup>®</sup> consumption in the presence of AgBF<sub>4</sub>

### 6.2. Interaction of AgBF<sub>4</sub> with 1a.

**Procedure:** To a 4 ml vial containing **1a** (18.9 mg, 0.100 mmol) and AgBF<sub>4</sub> (19.4 mg, 0.100 mmol) was added 1:9 (v/v) Acetone-*d*<sub>6</sub>/D<sub>2</sub>O (1.0 ml). The contents of the reaction vial were then transferred into a NMR tube and spectroscopic data was collected right after. The same procedure was followed with varying amounts of AgBF<sub>4</sub>. The residual signal of acetone was used as internal reference.

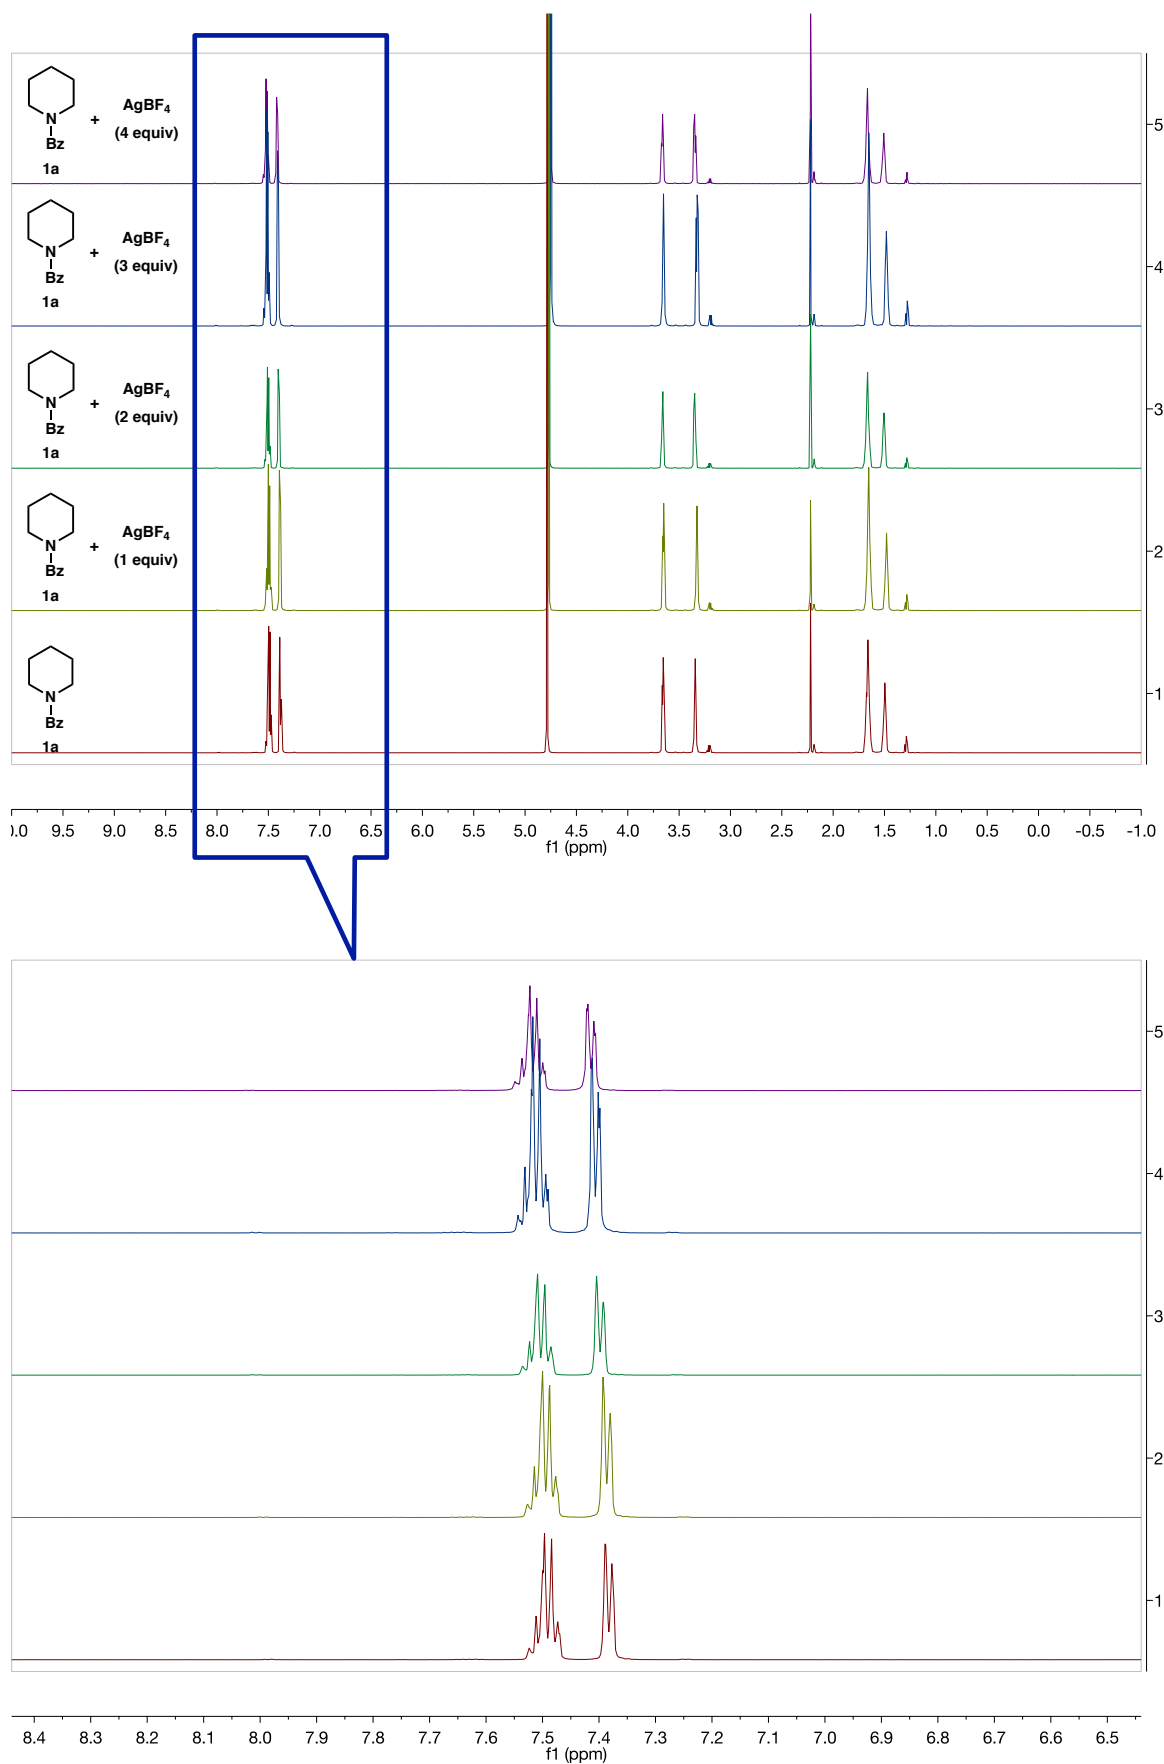

Fig. S3.  $^1\text{H}$  NMR monitoring of interaction of  $\text{AgBF}_4$  and **1a**

## 7. NMR Spectra

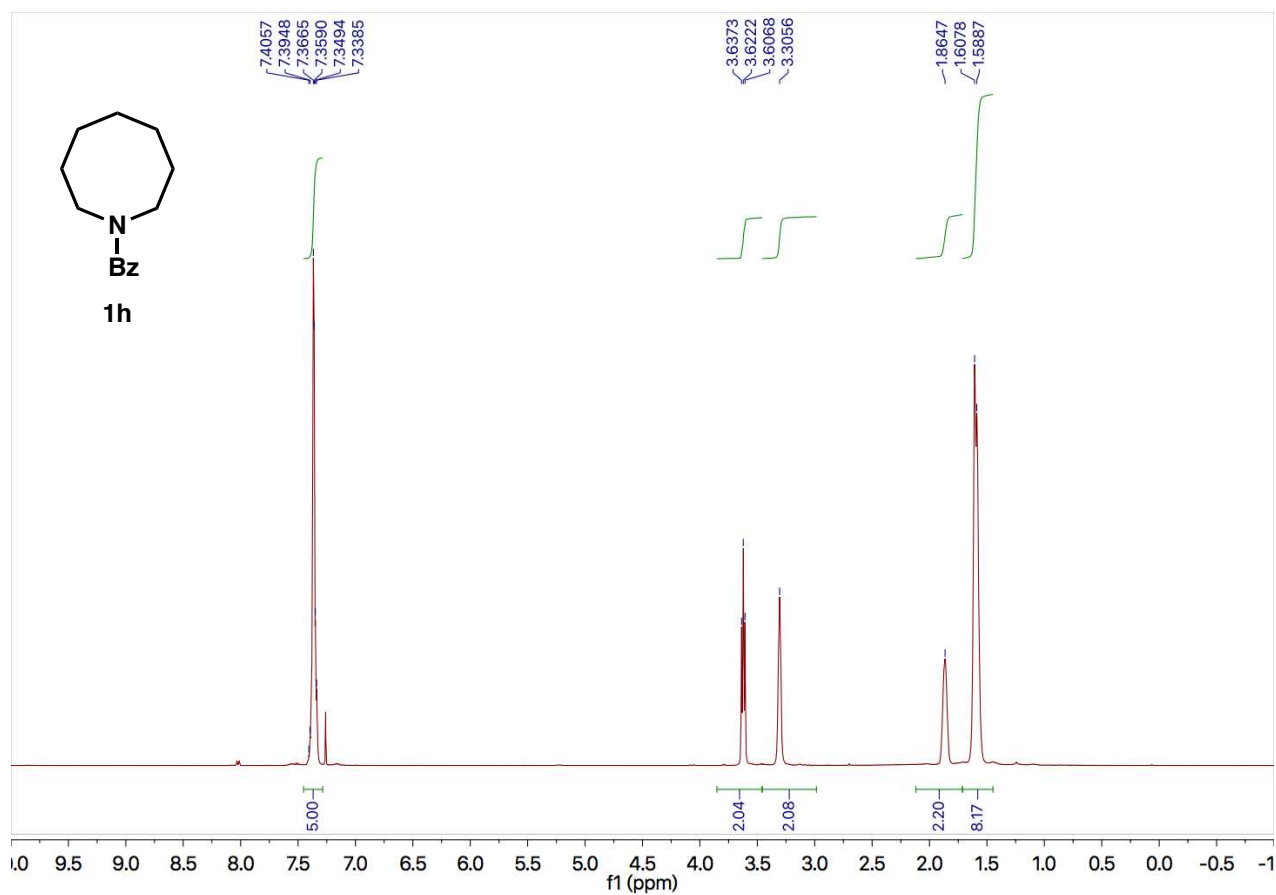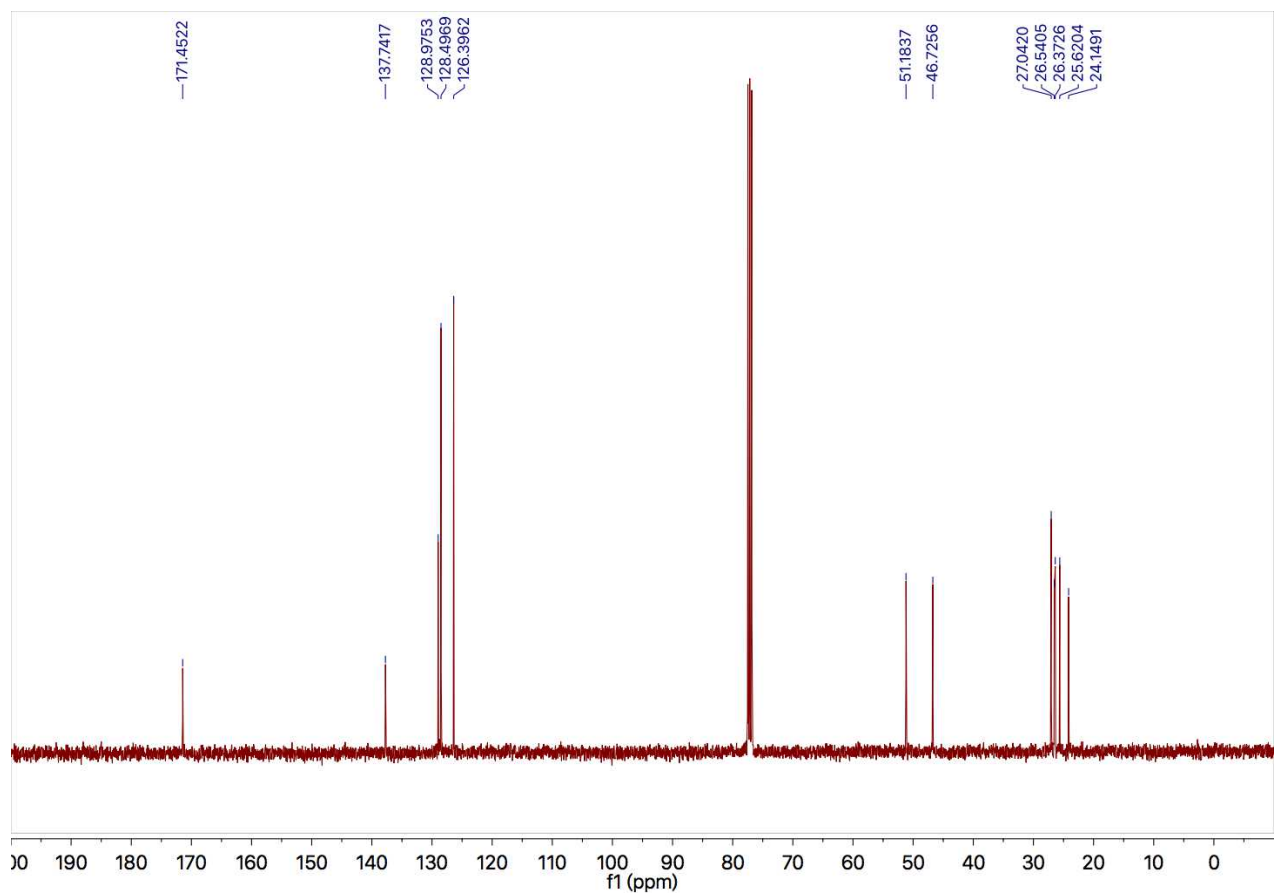

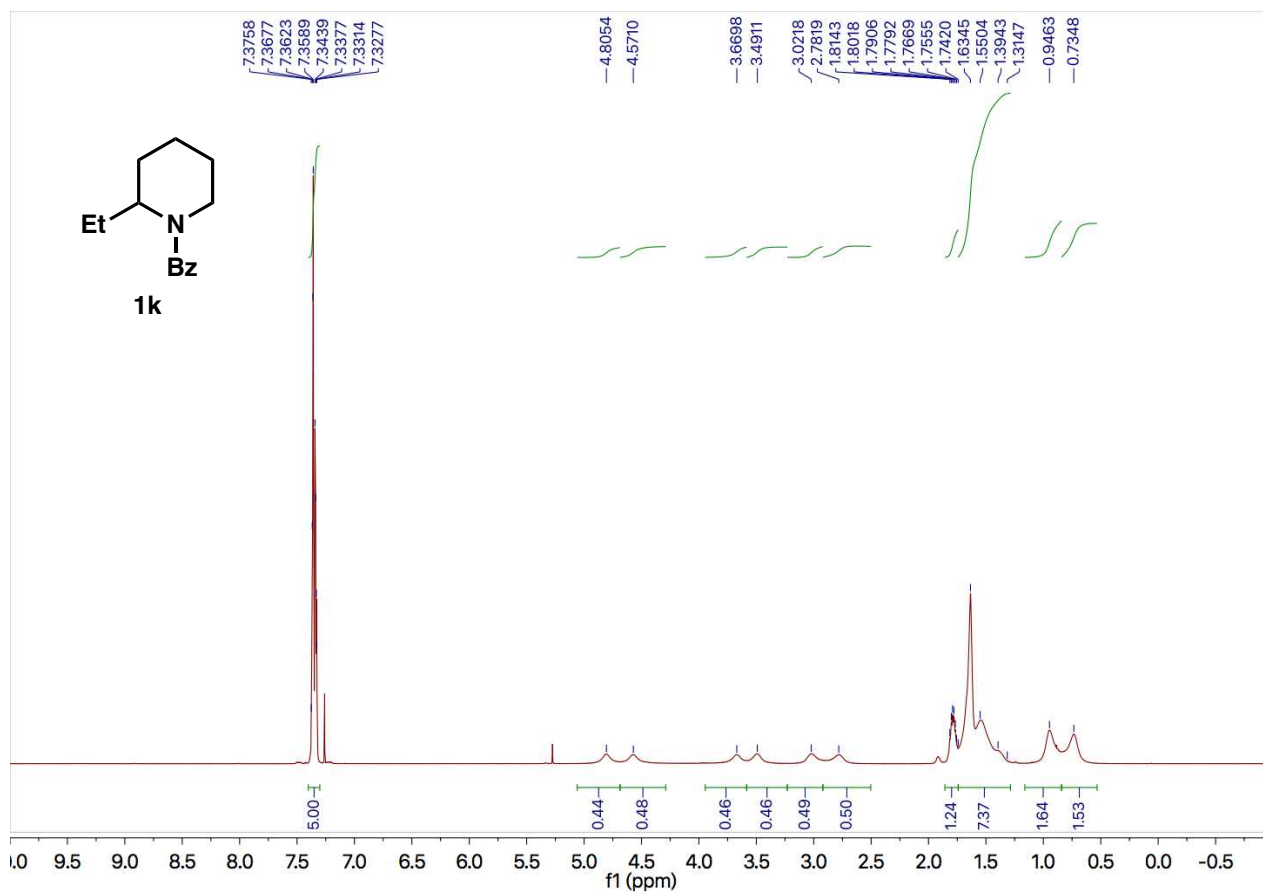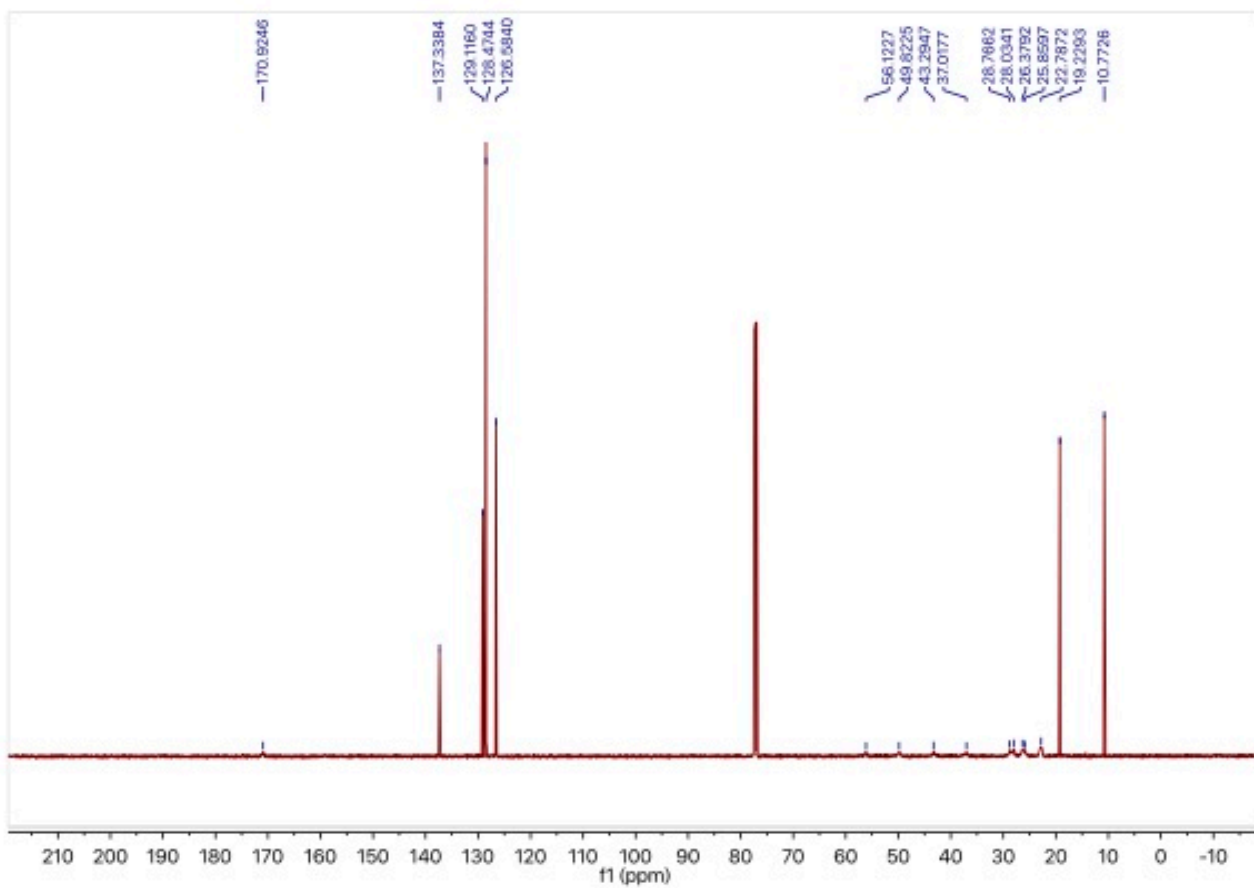

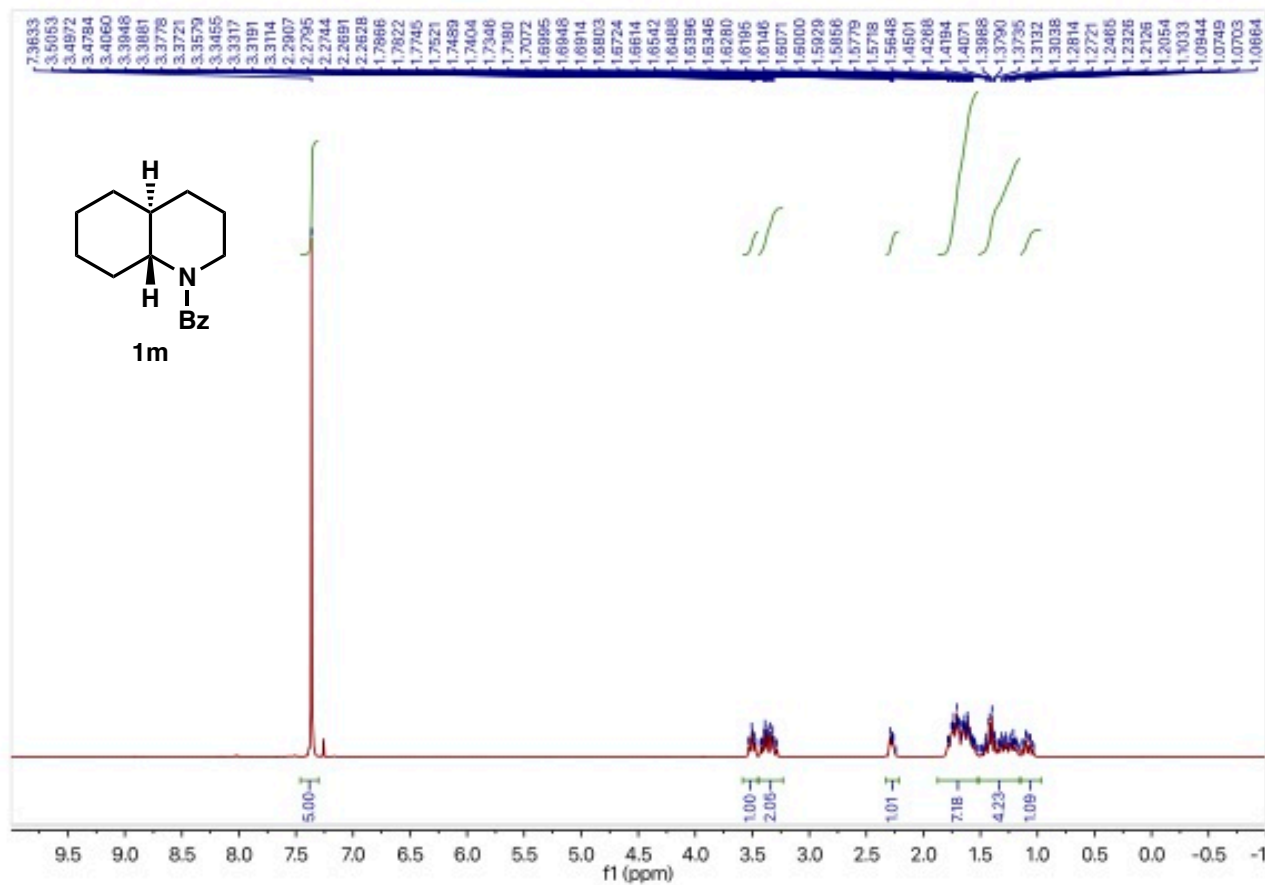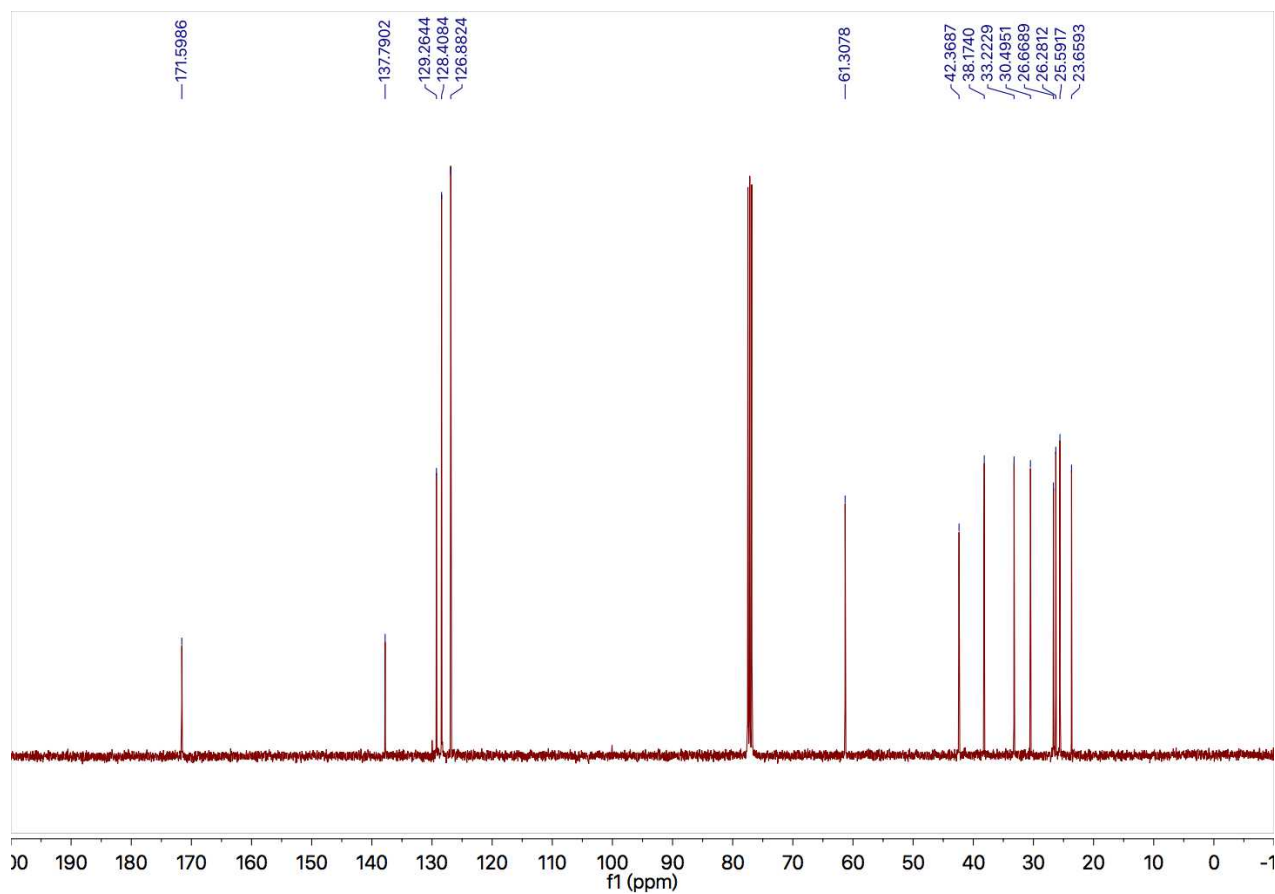

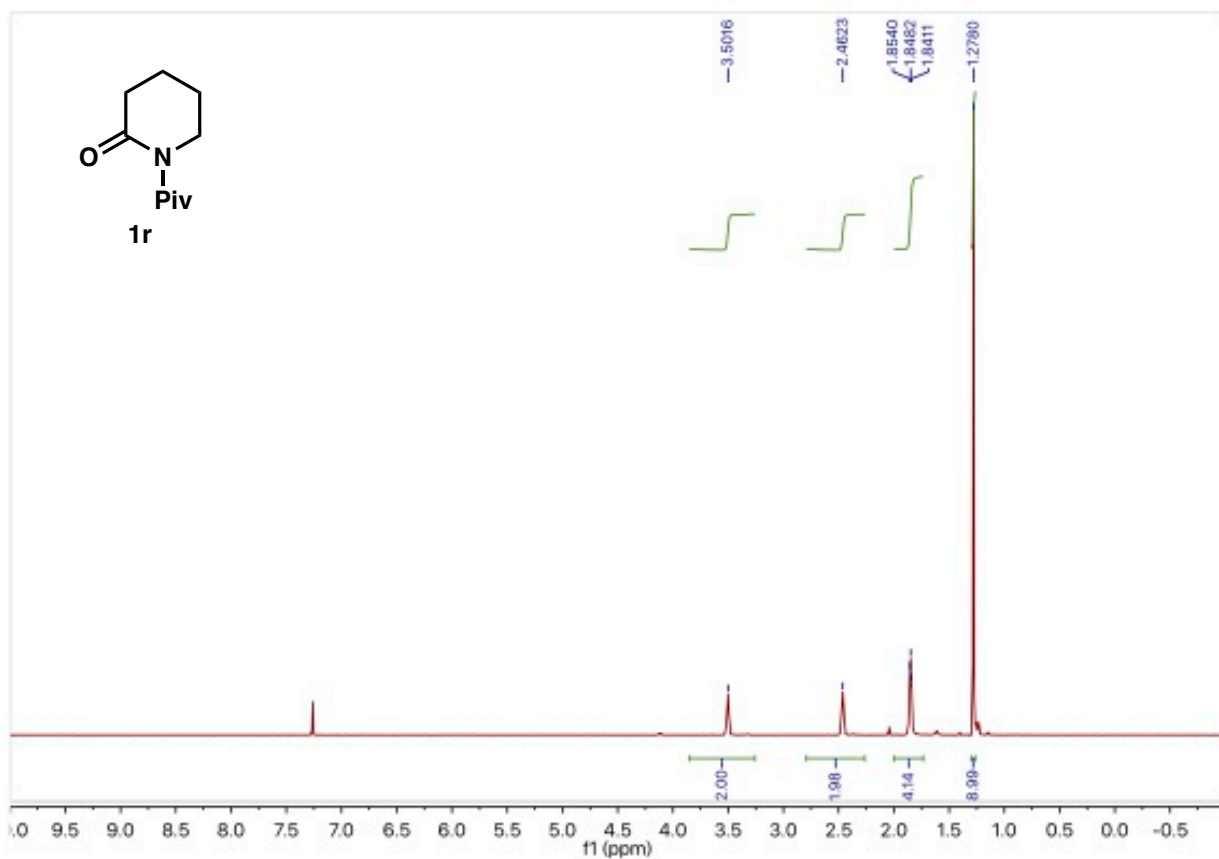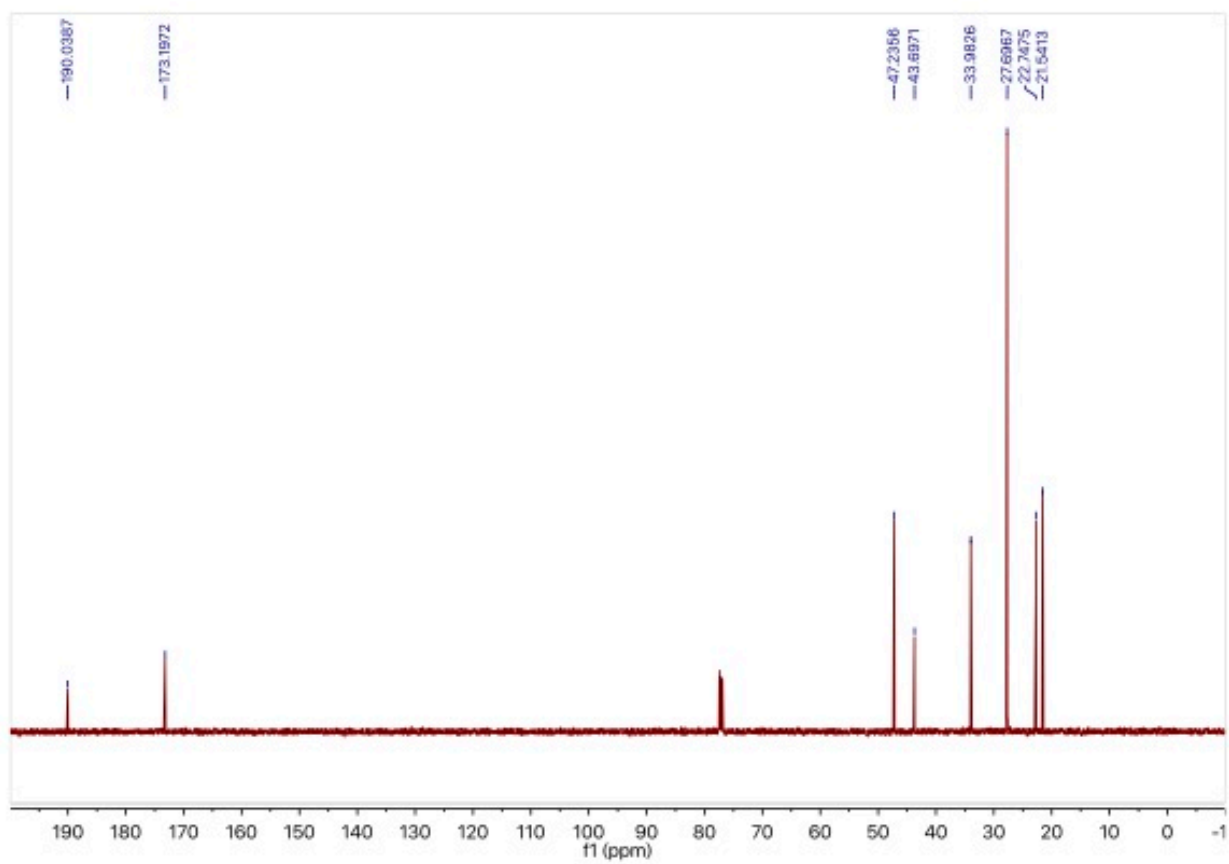

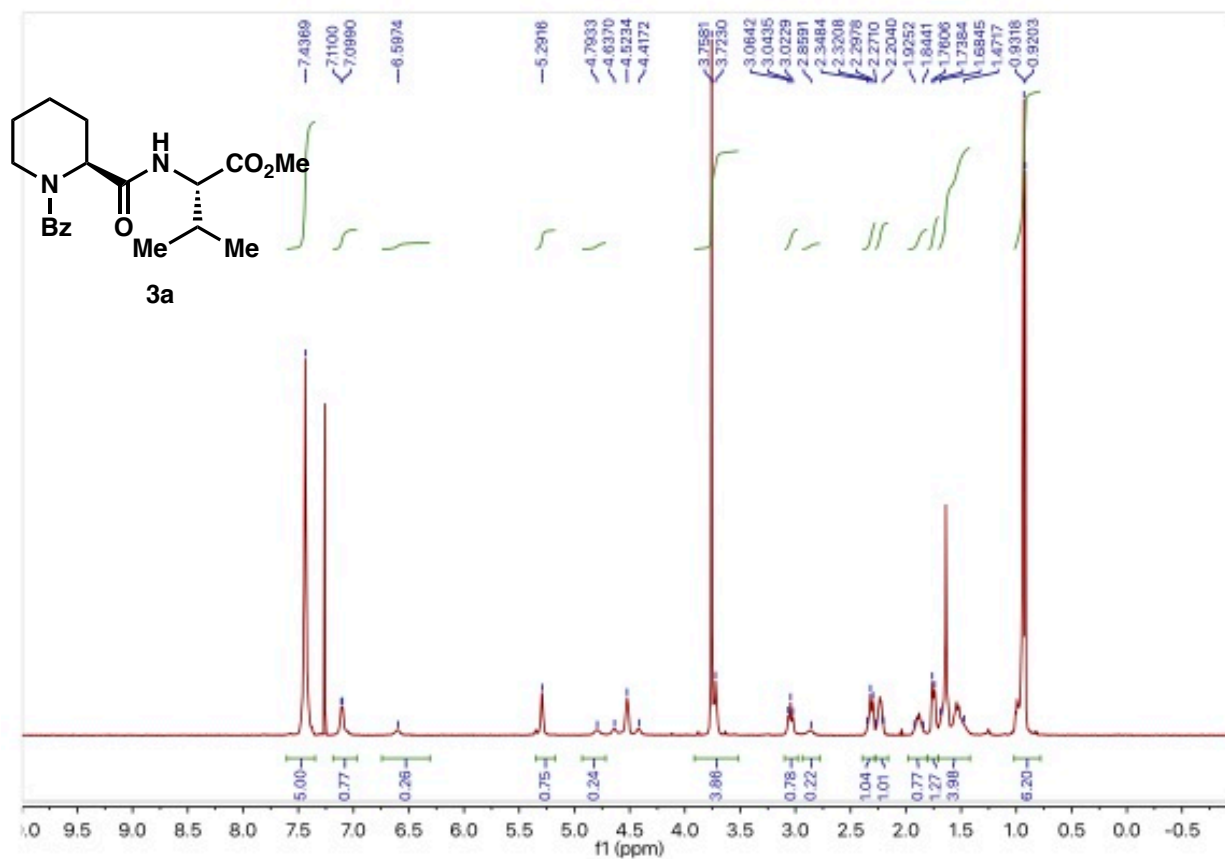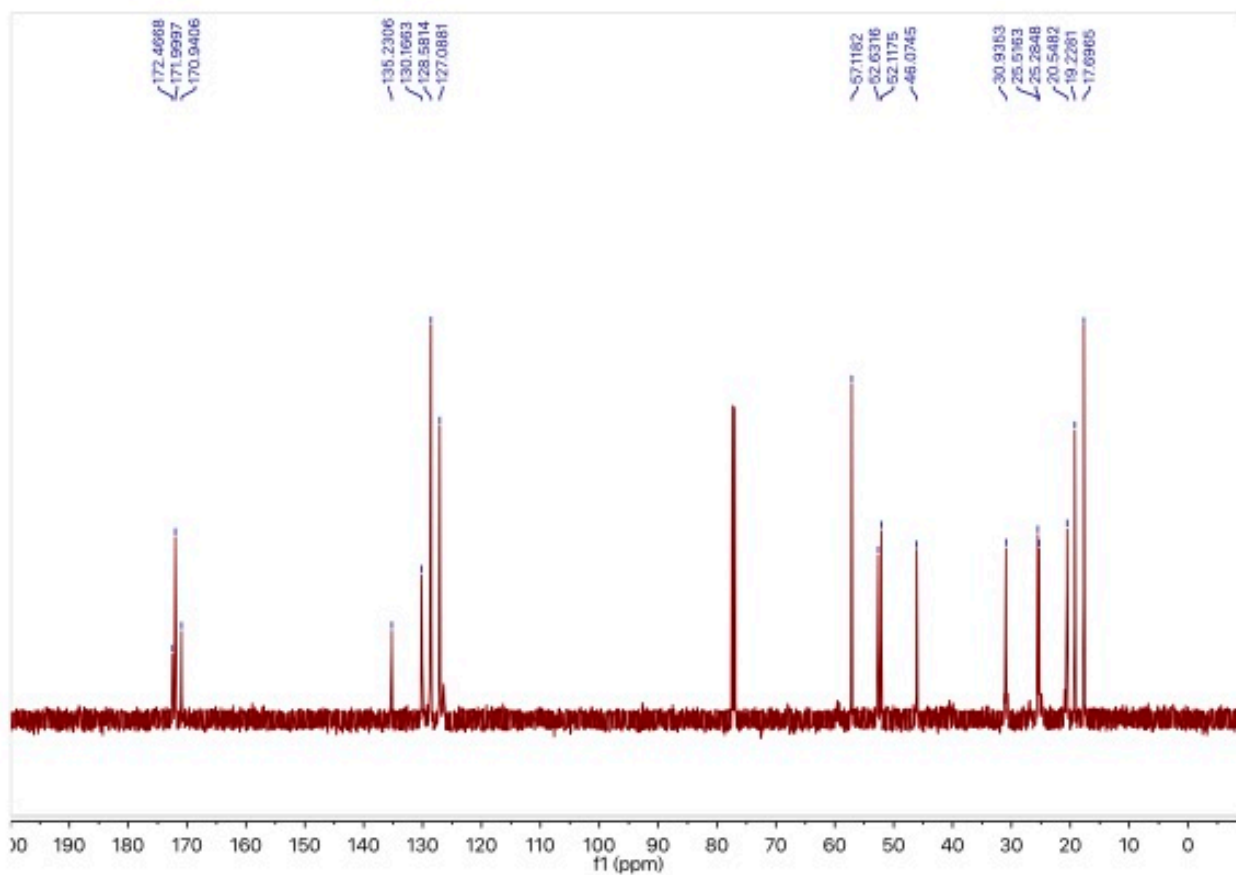



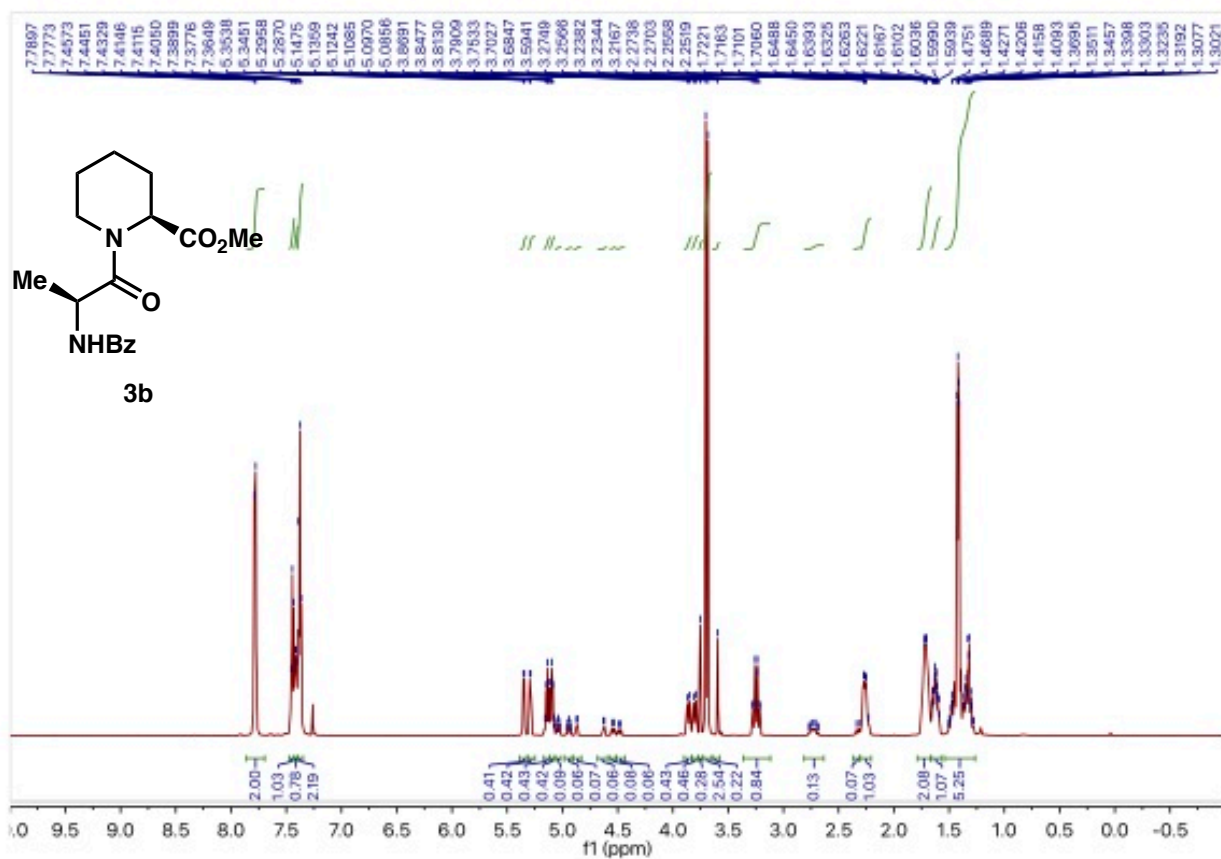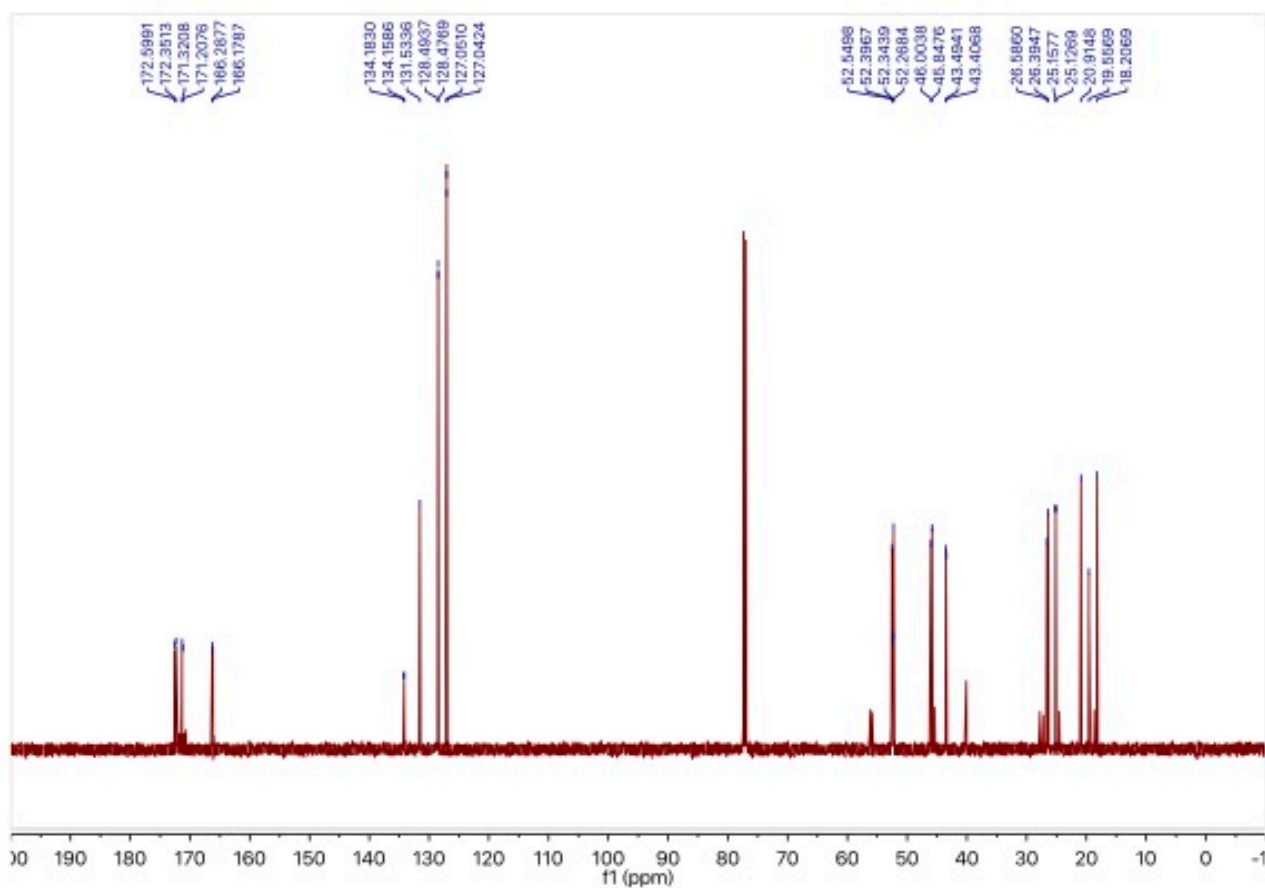

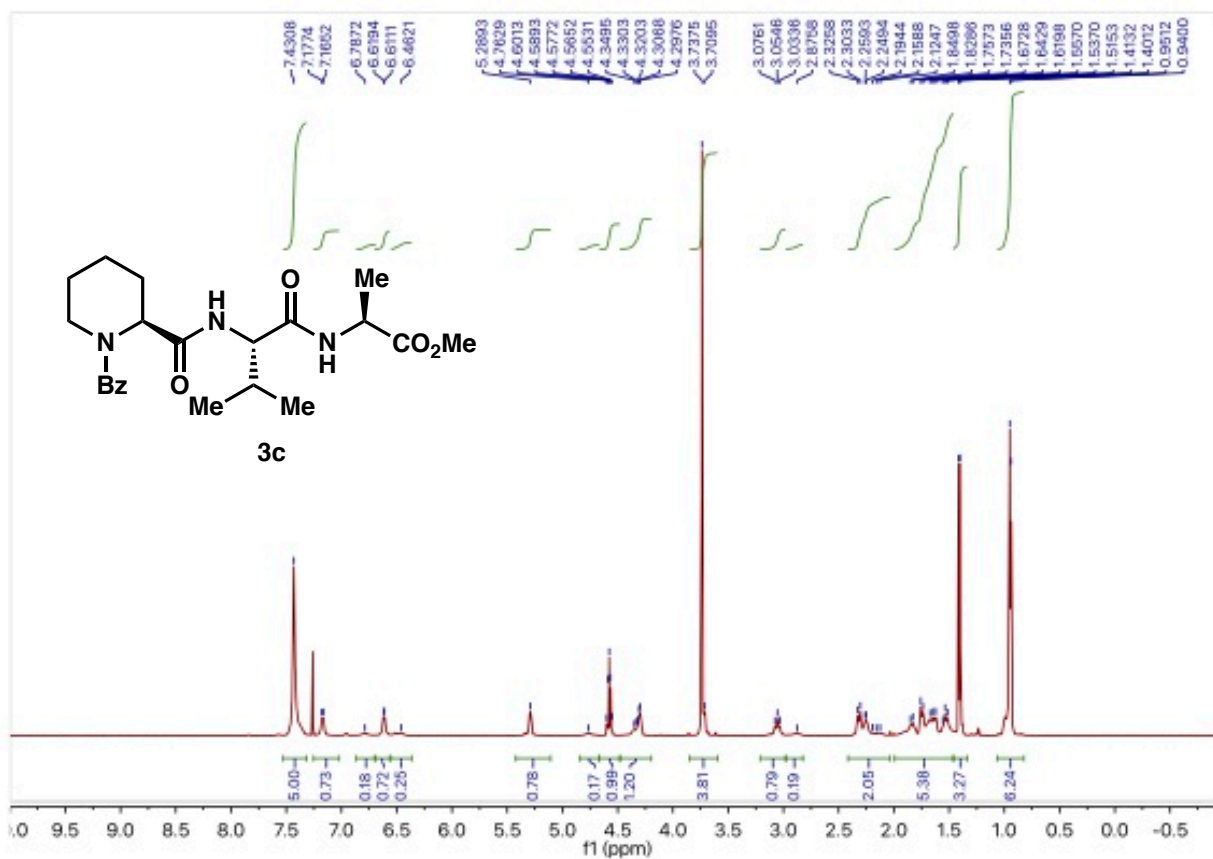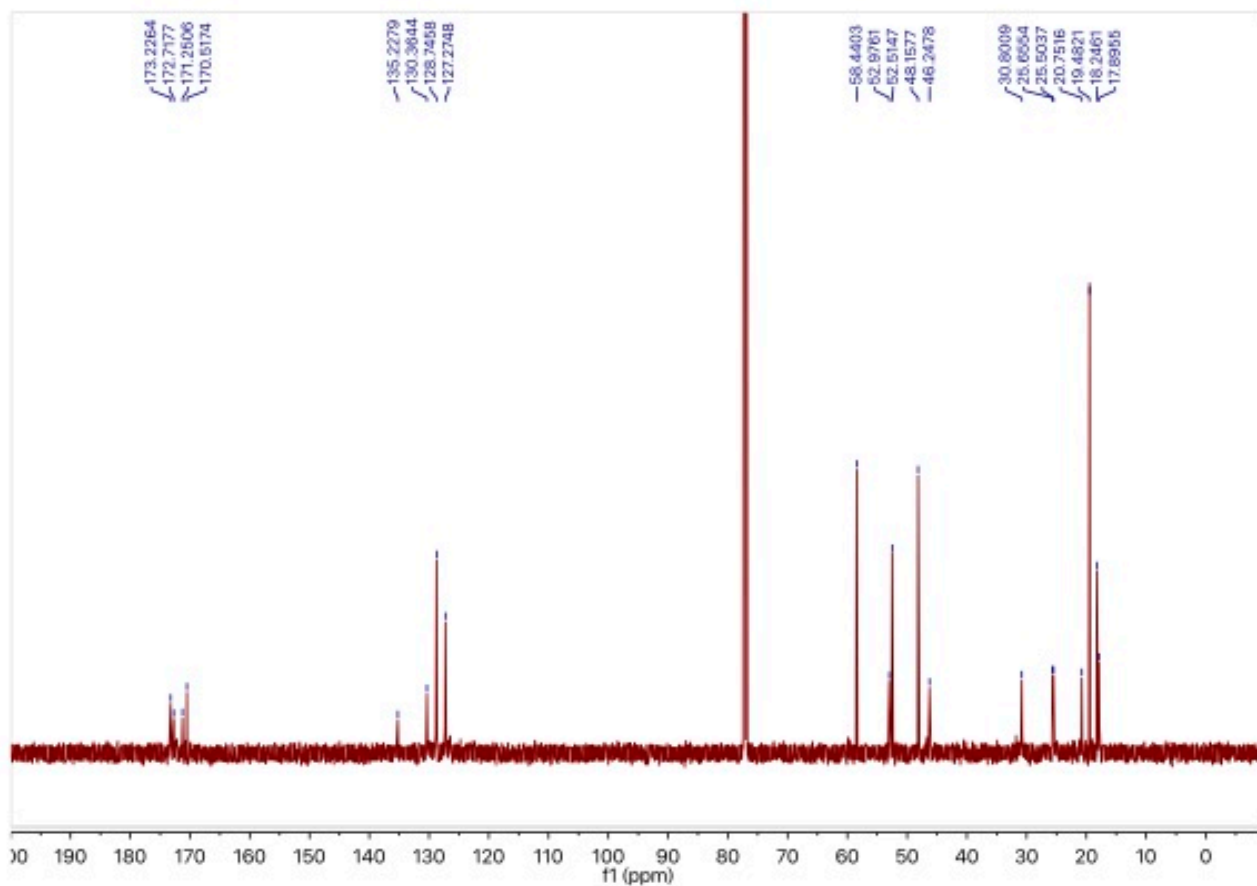

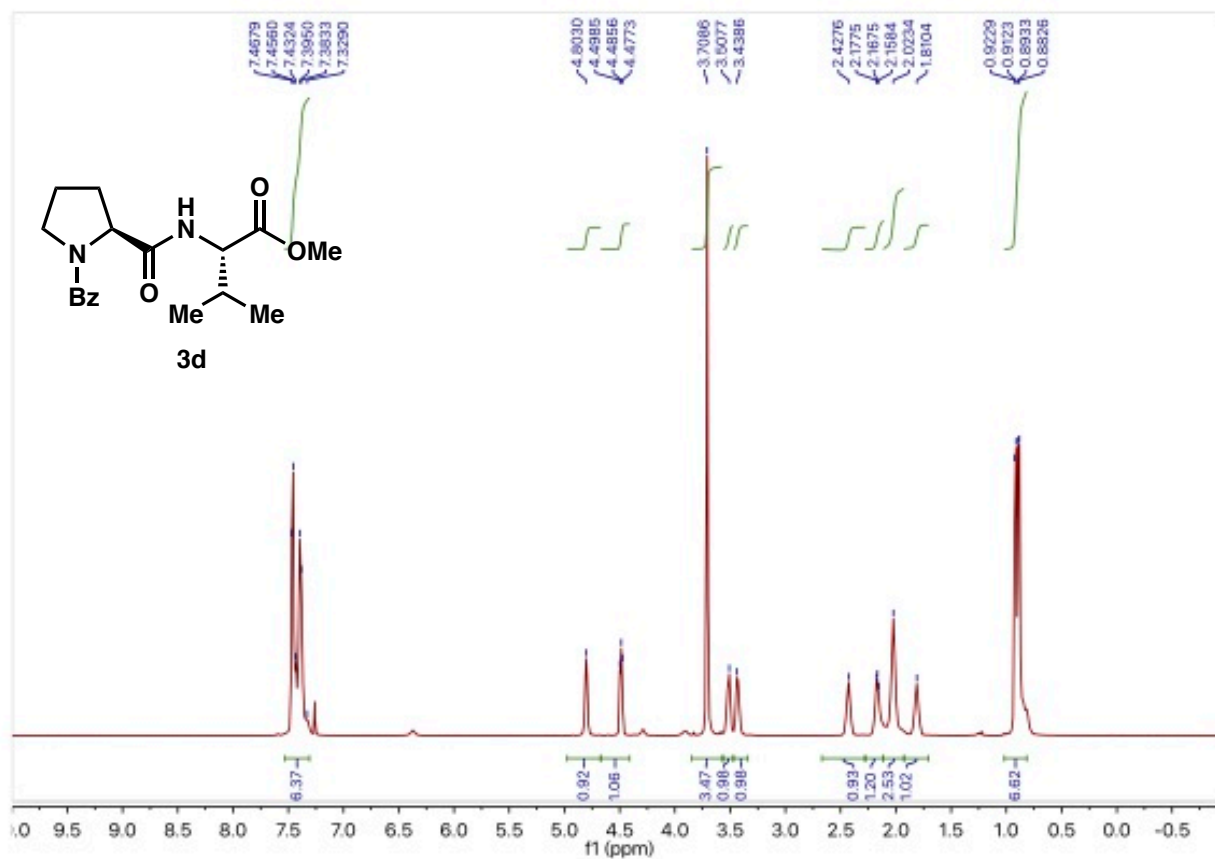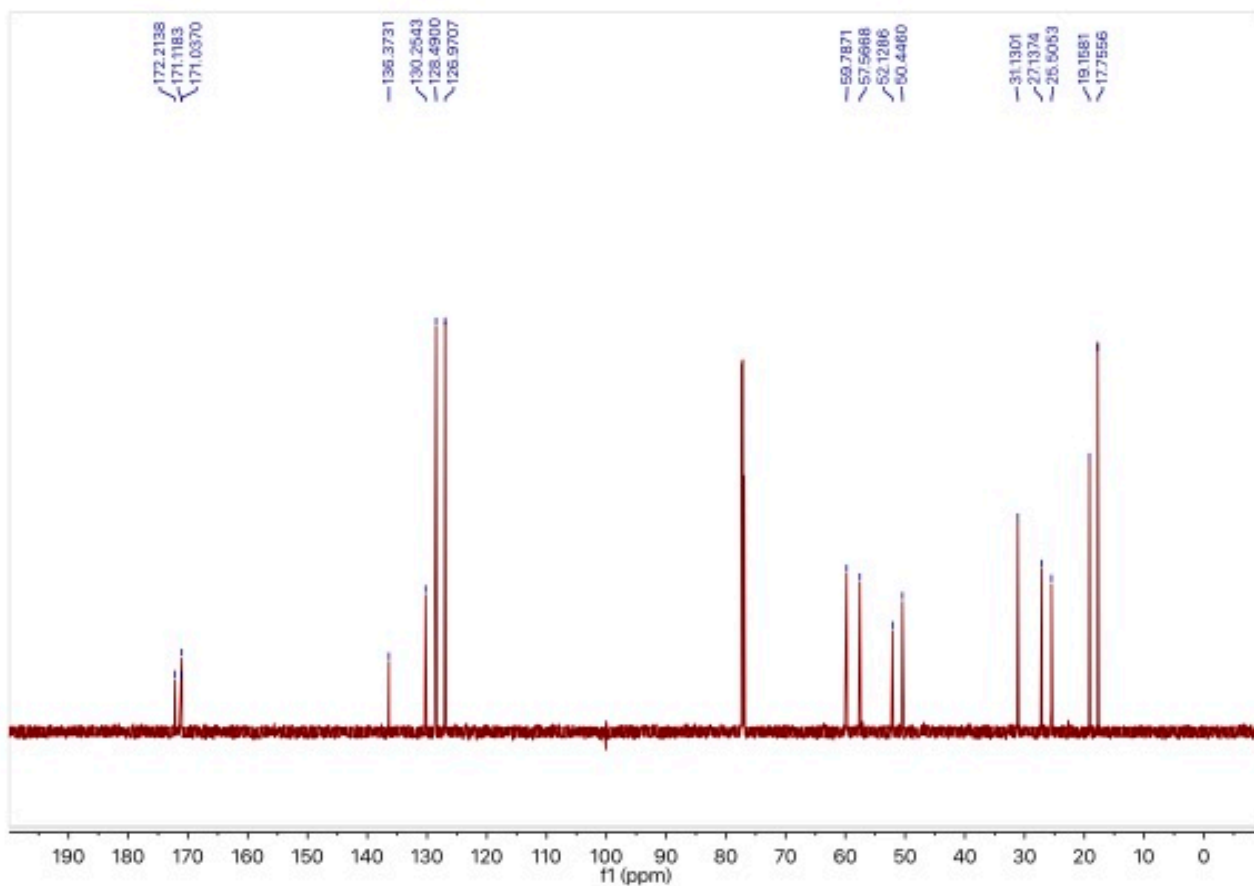

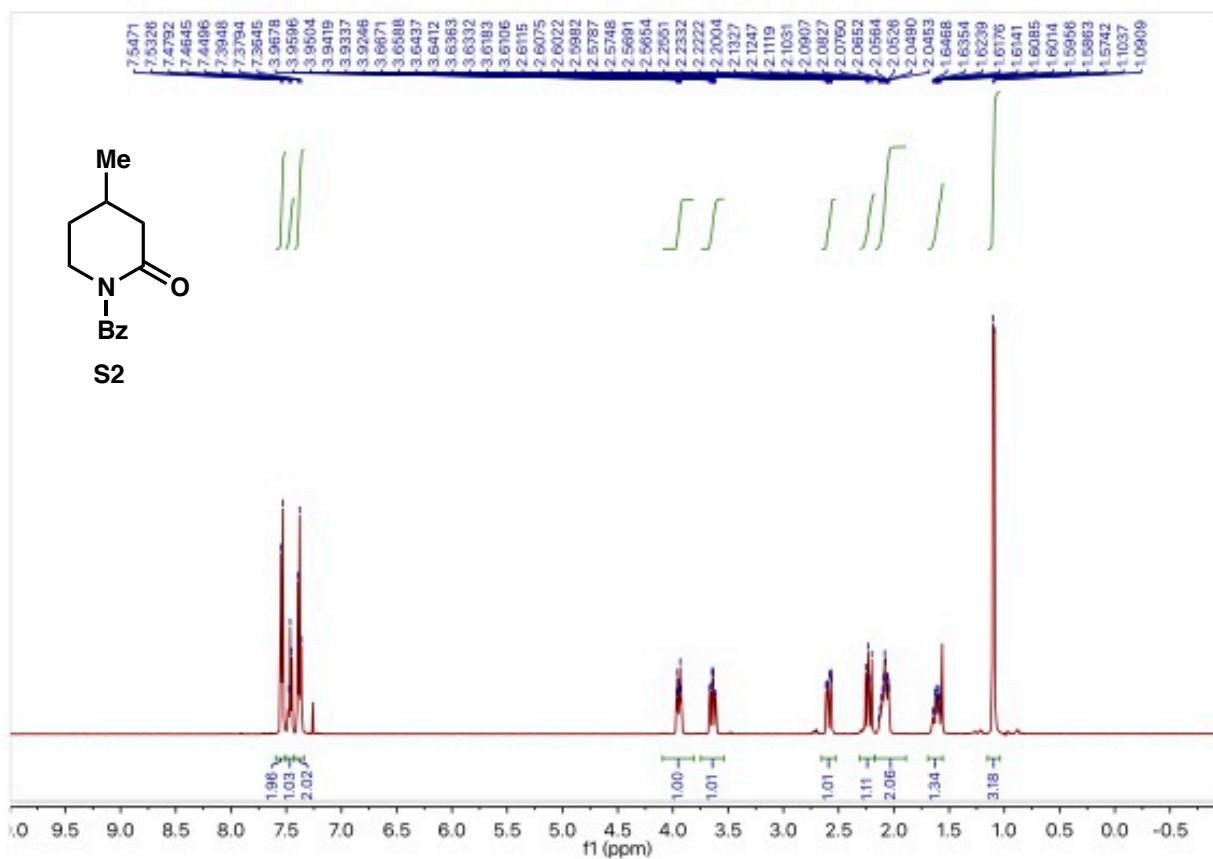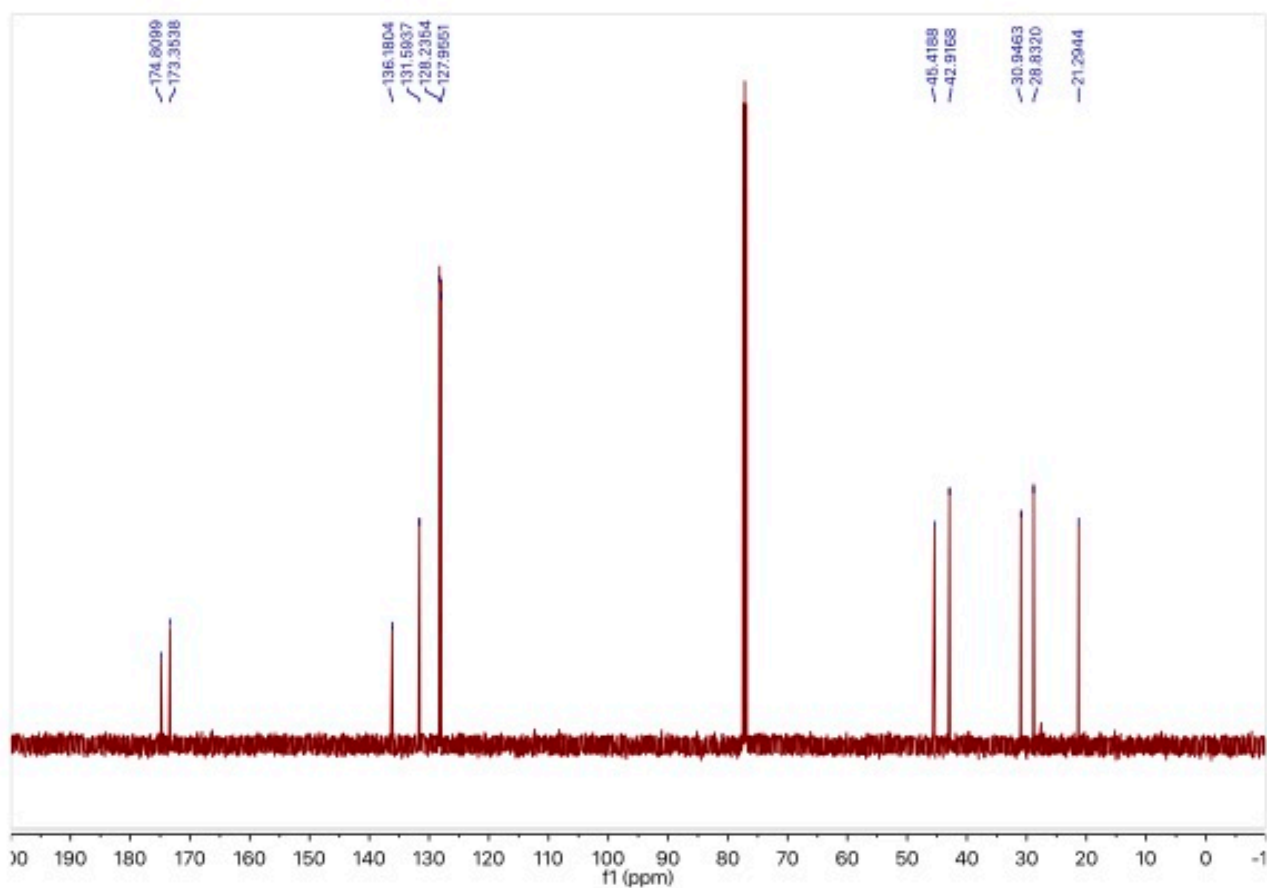

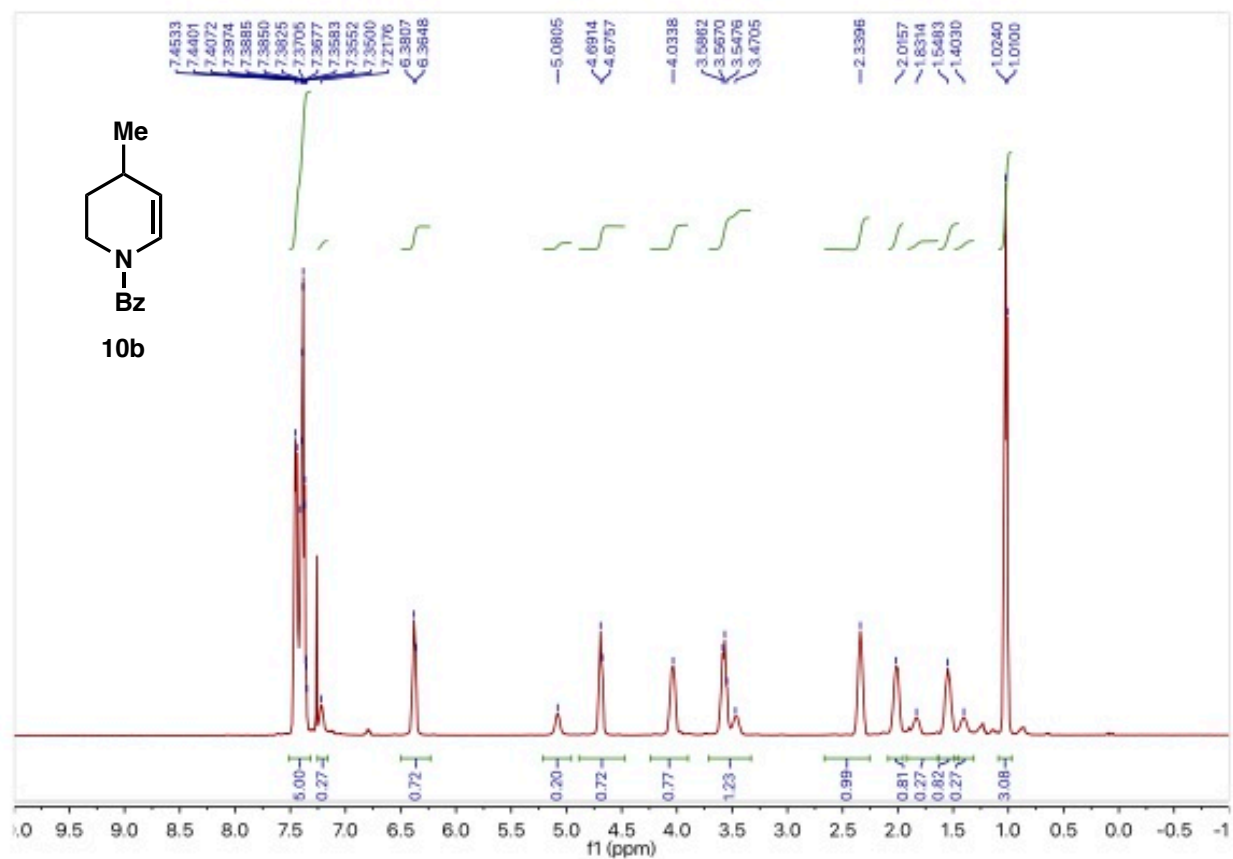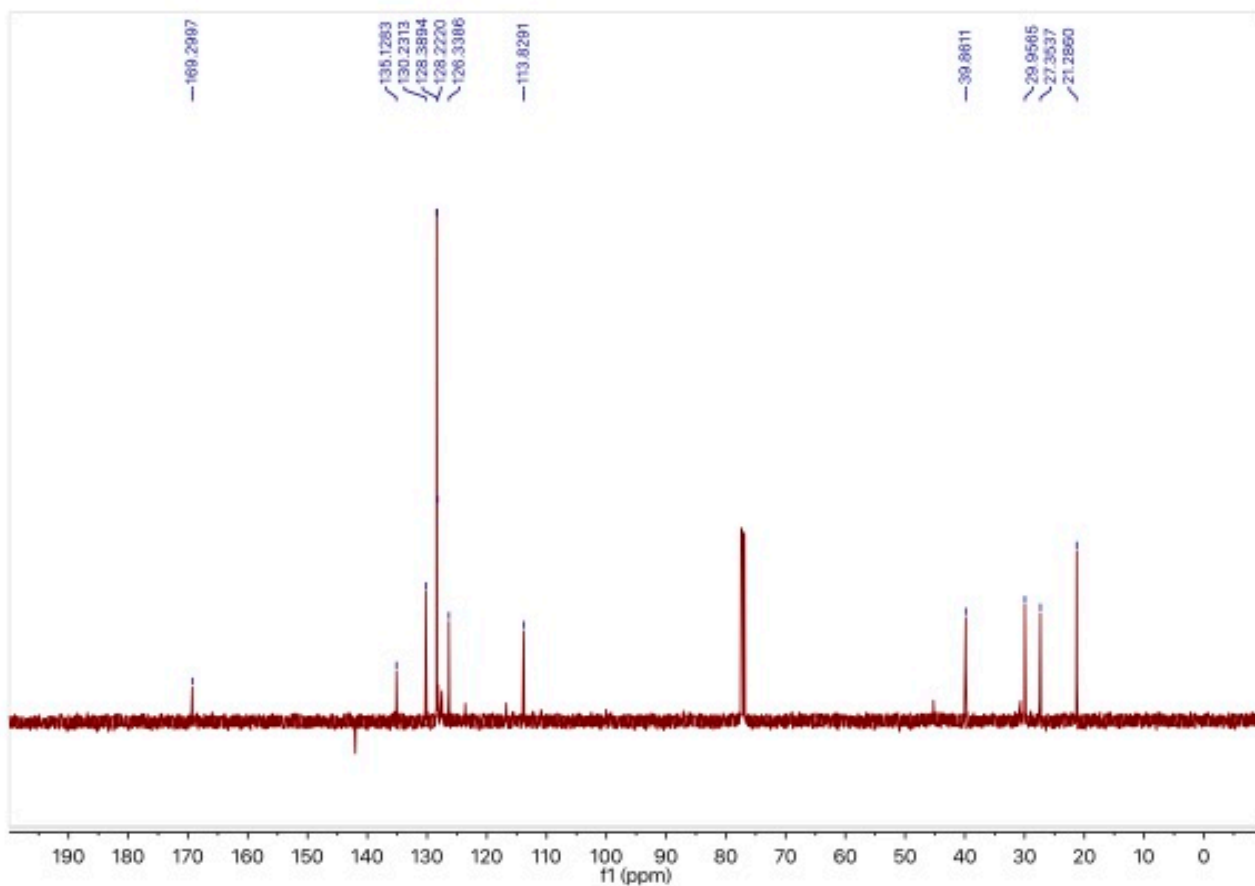

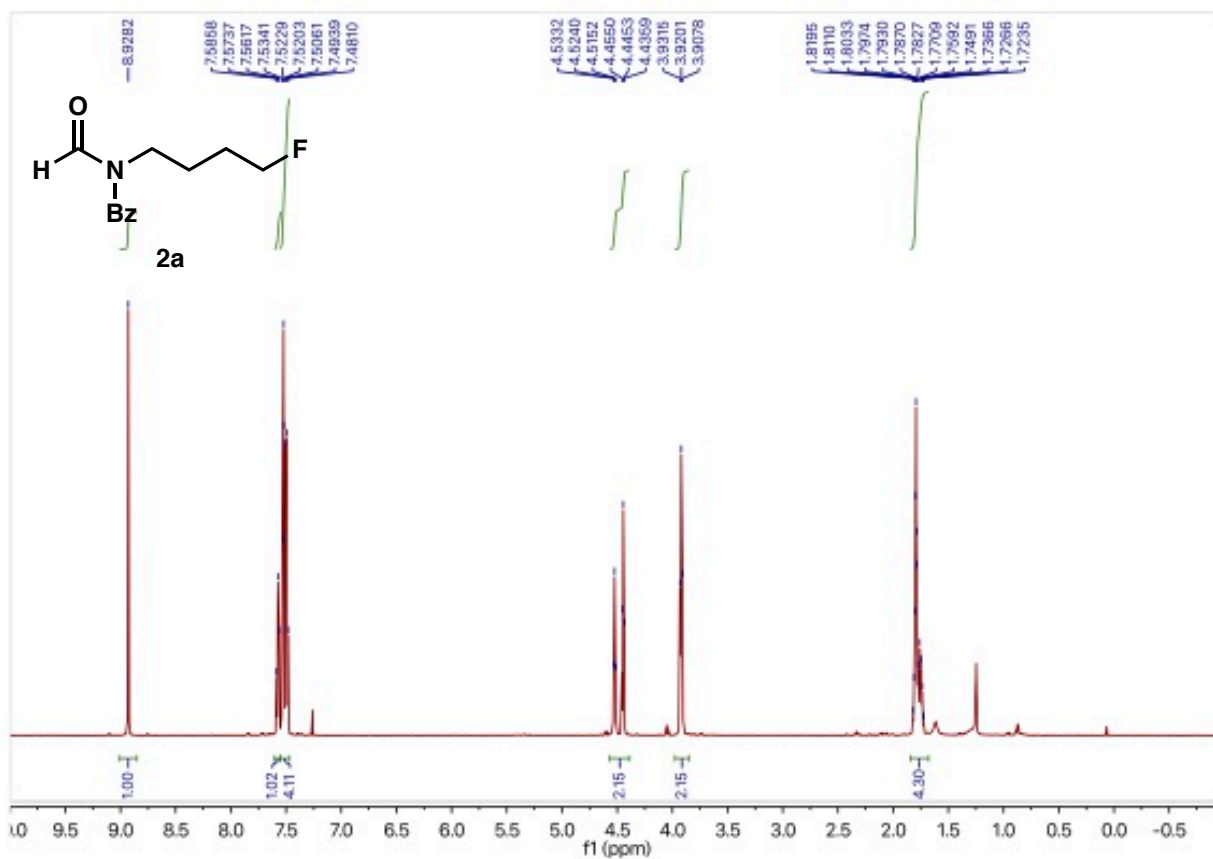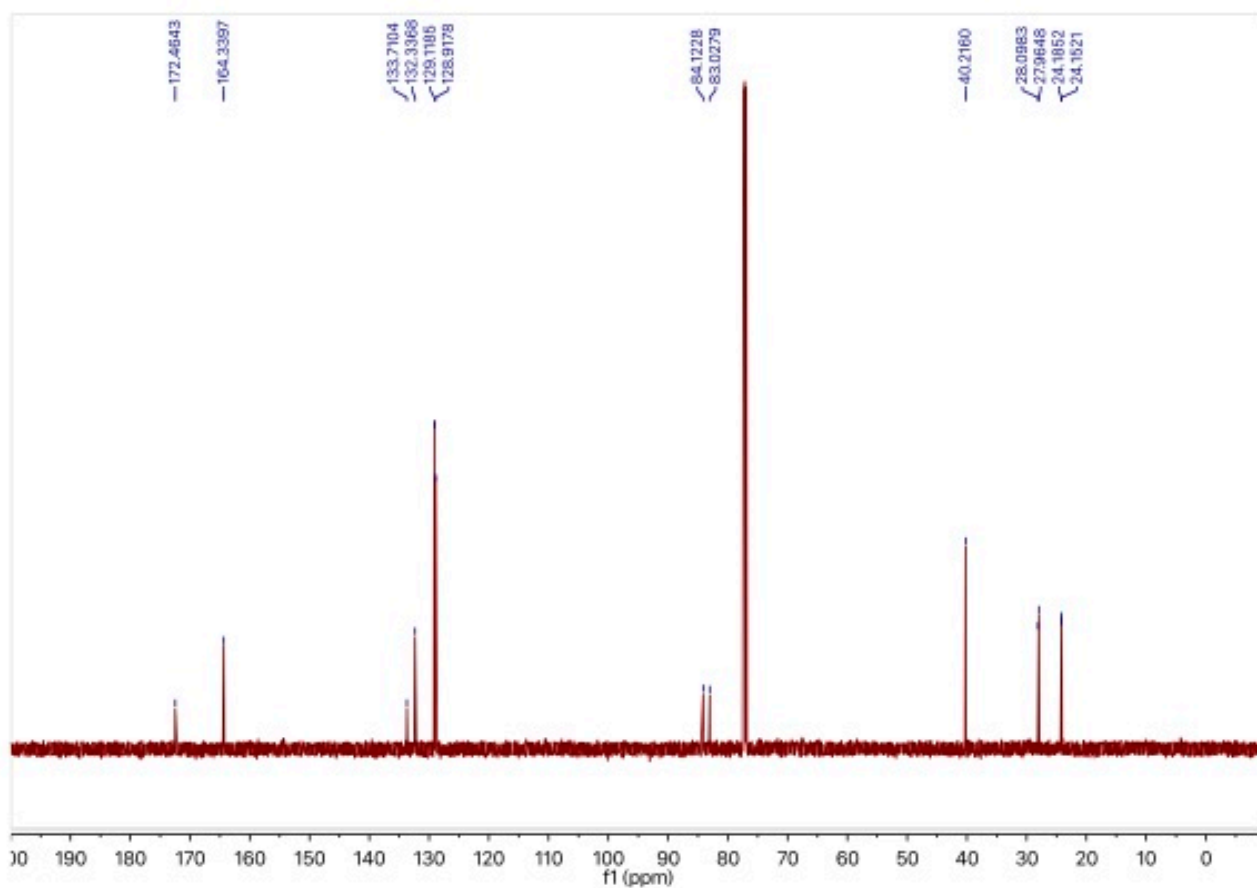

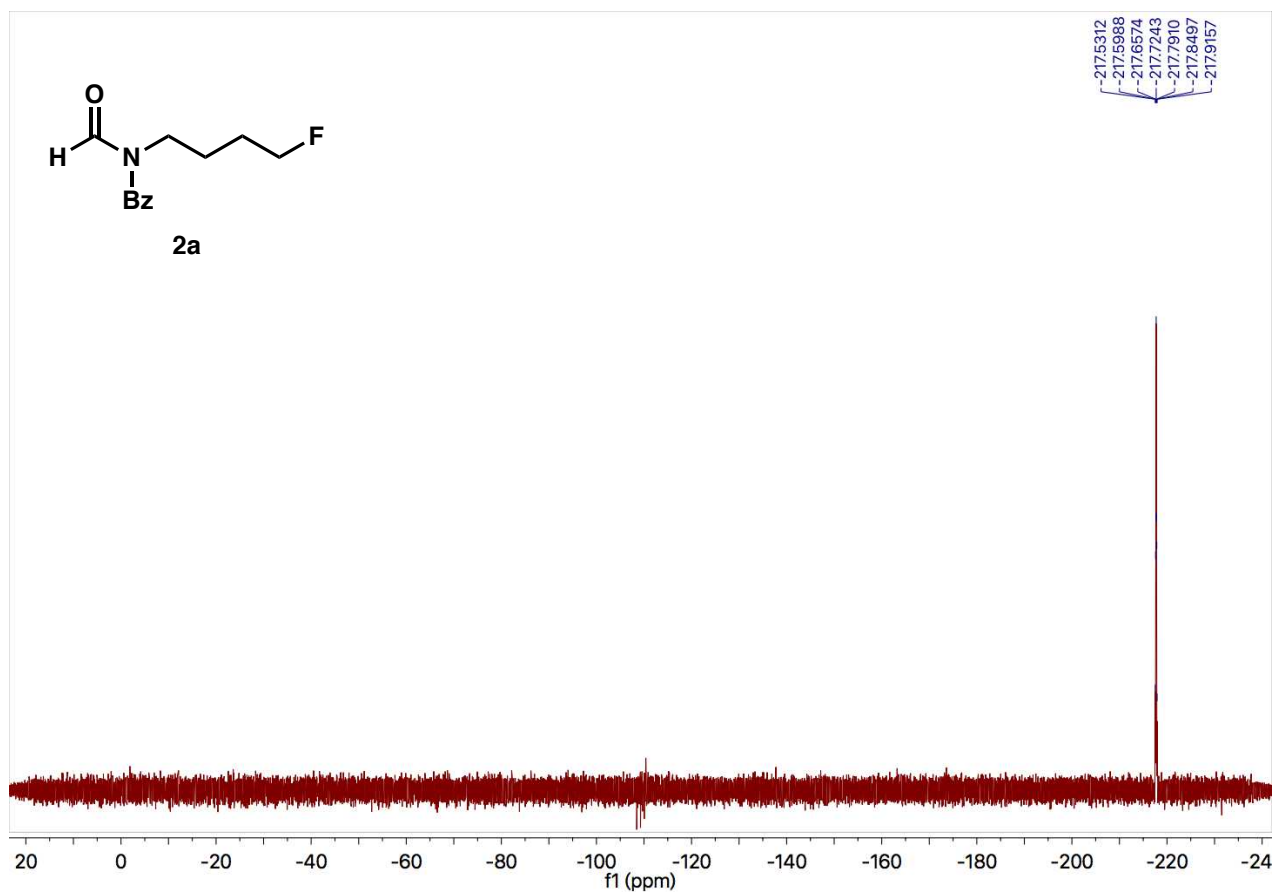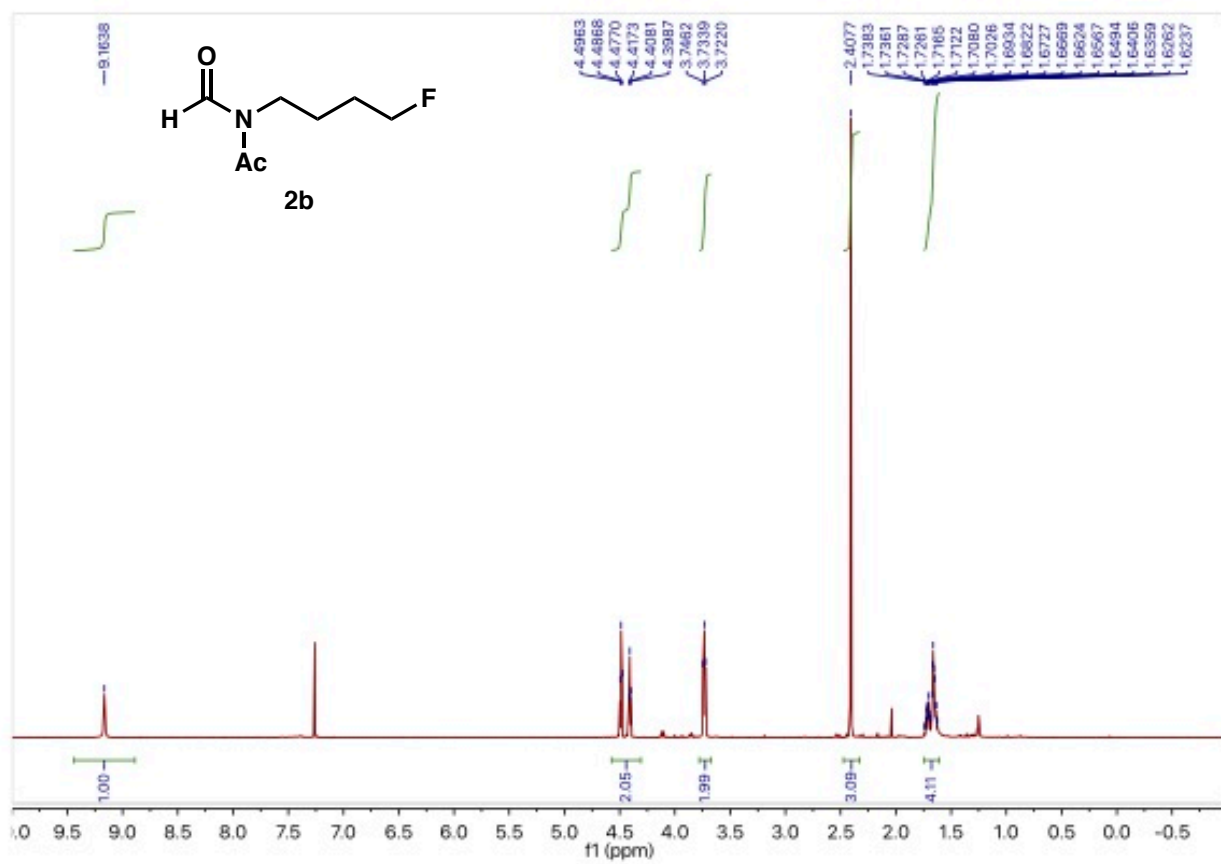



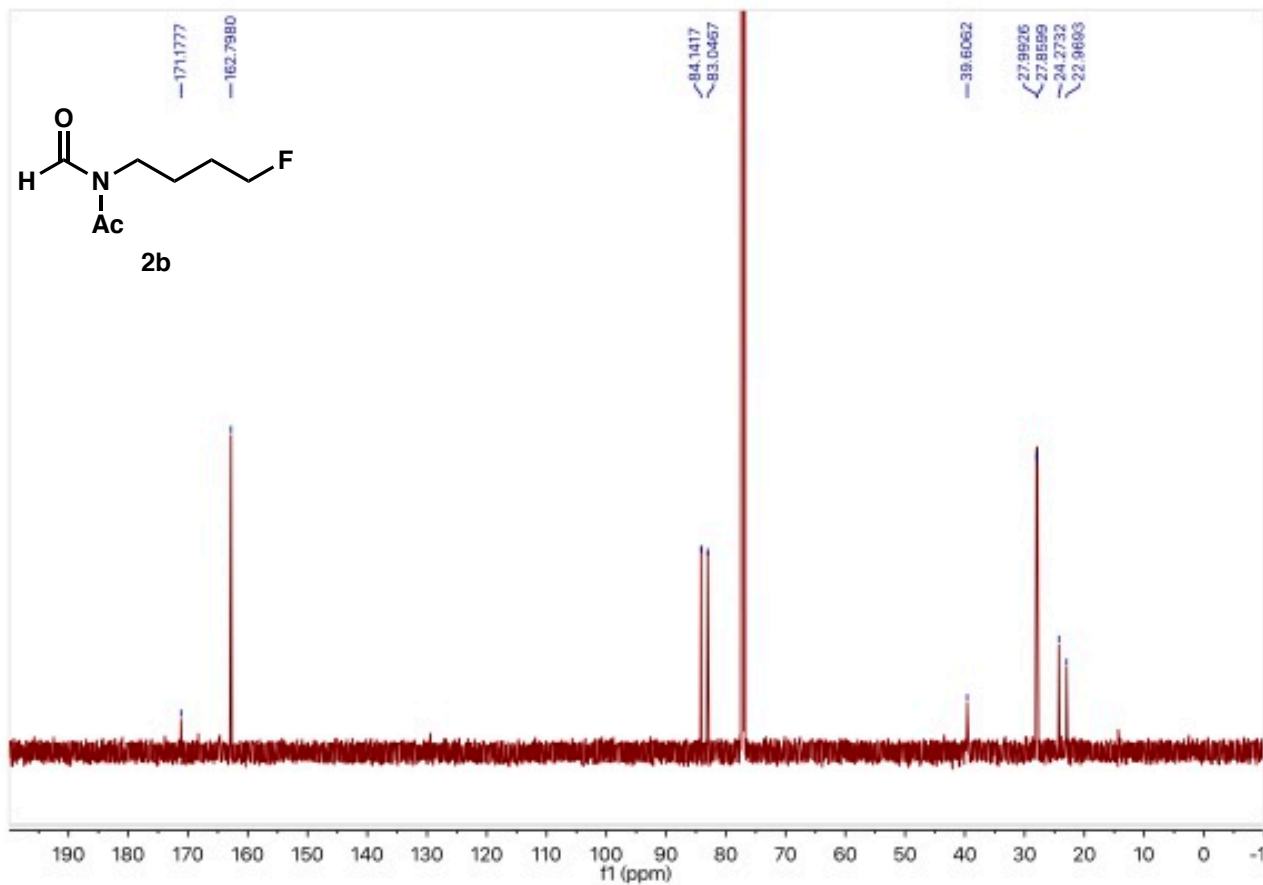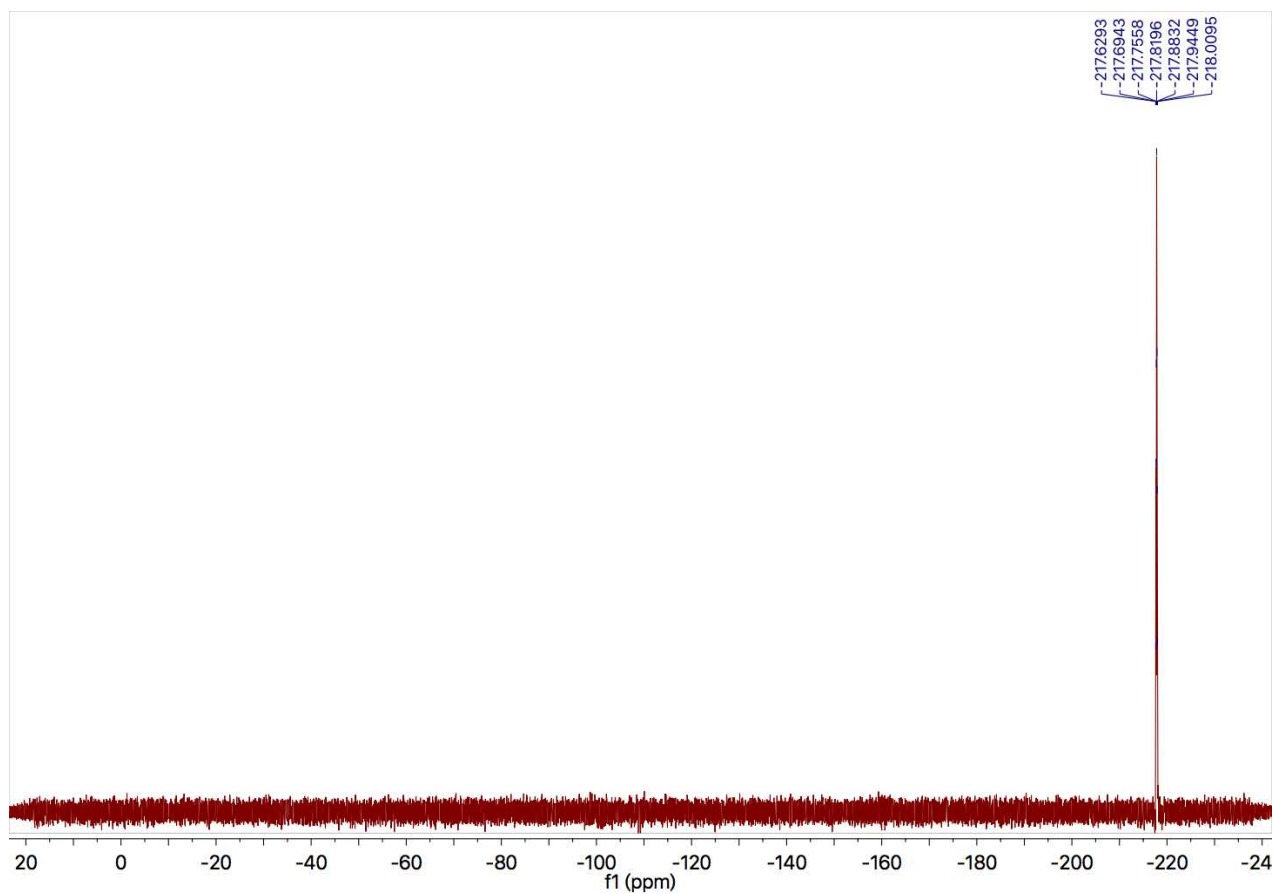



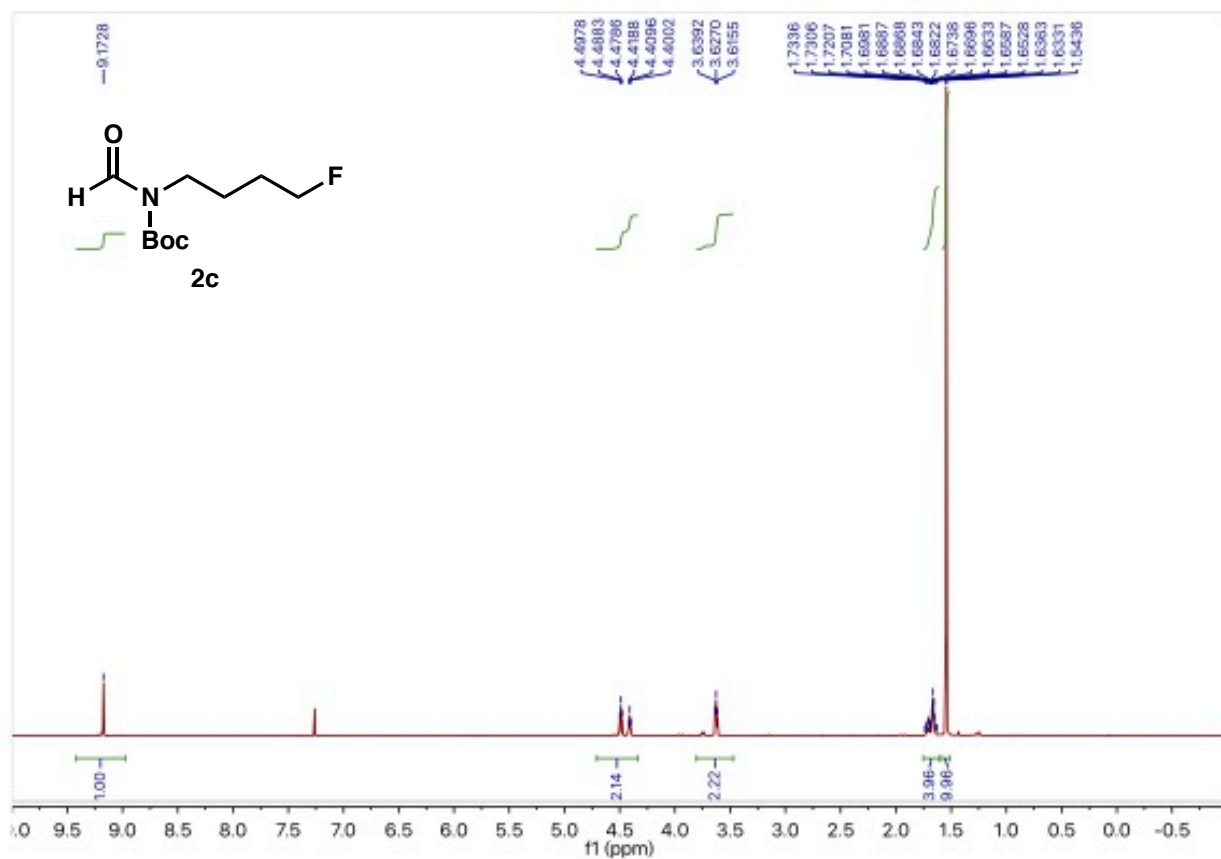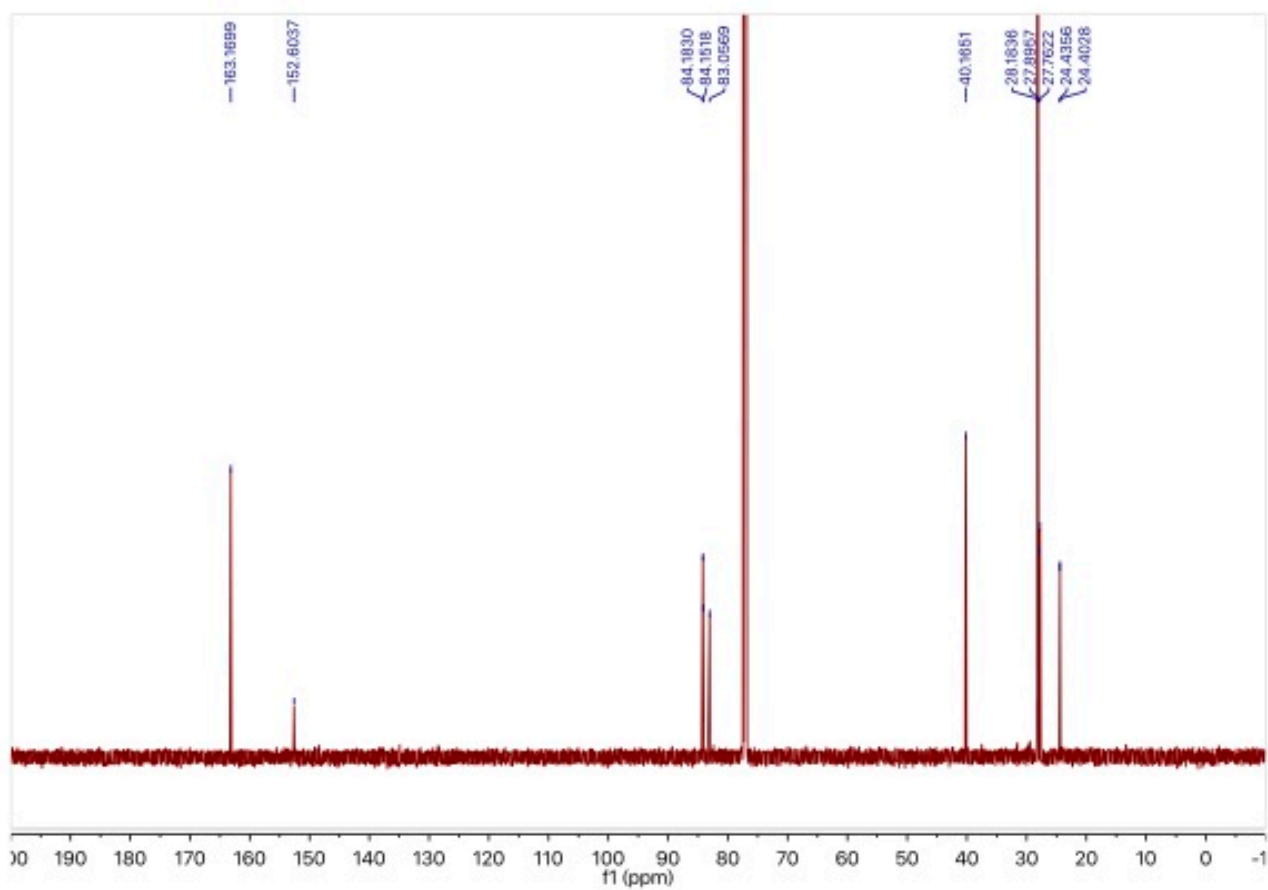

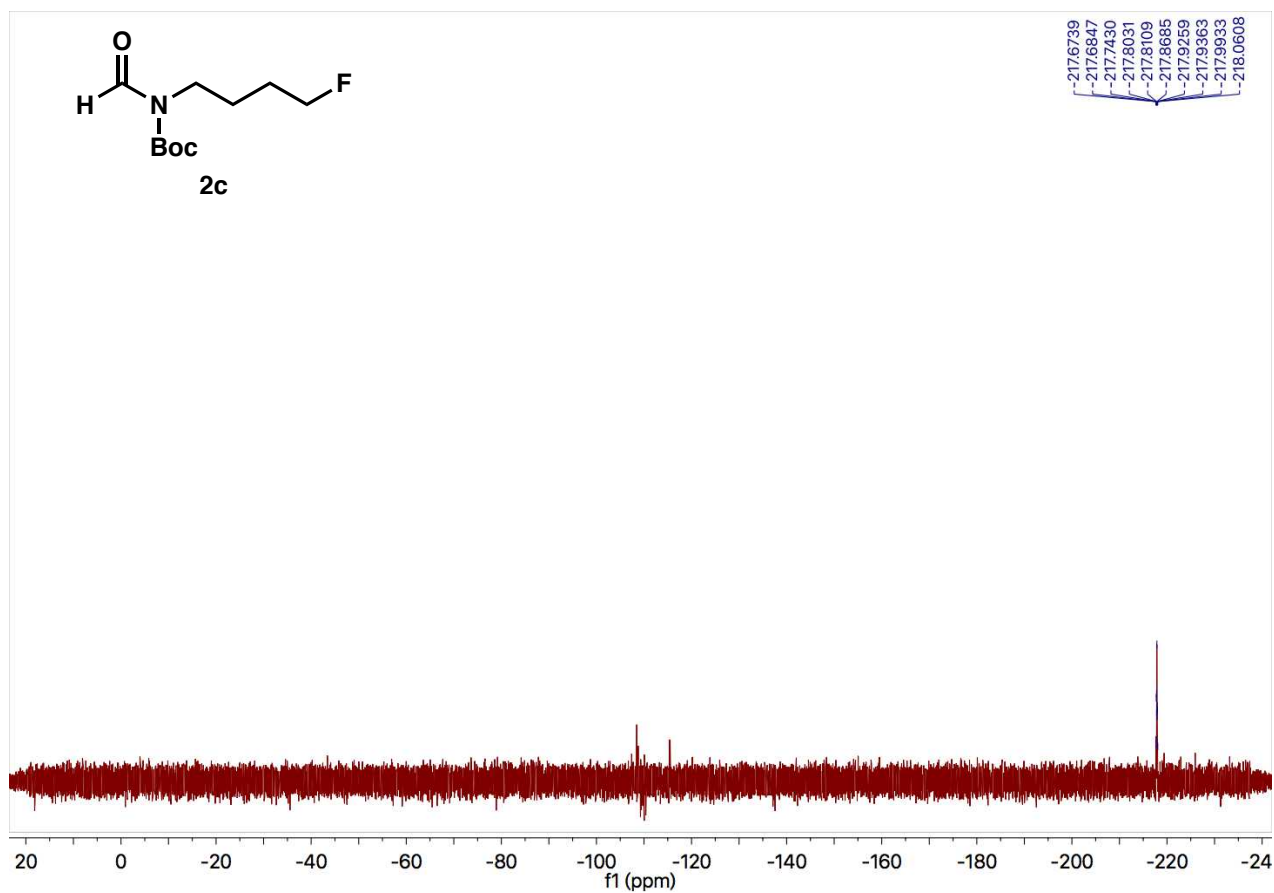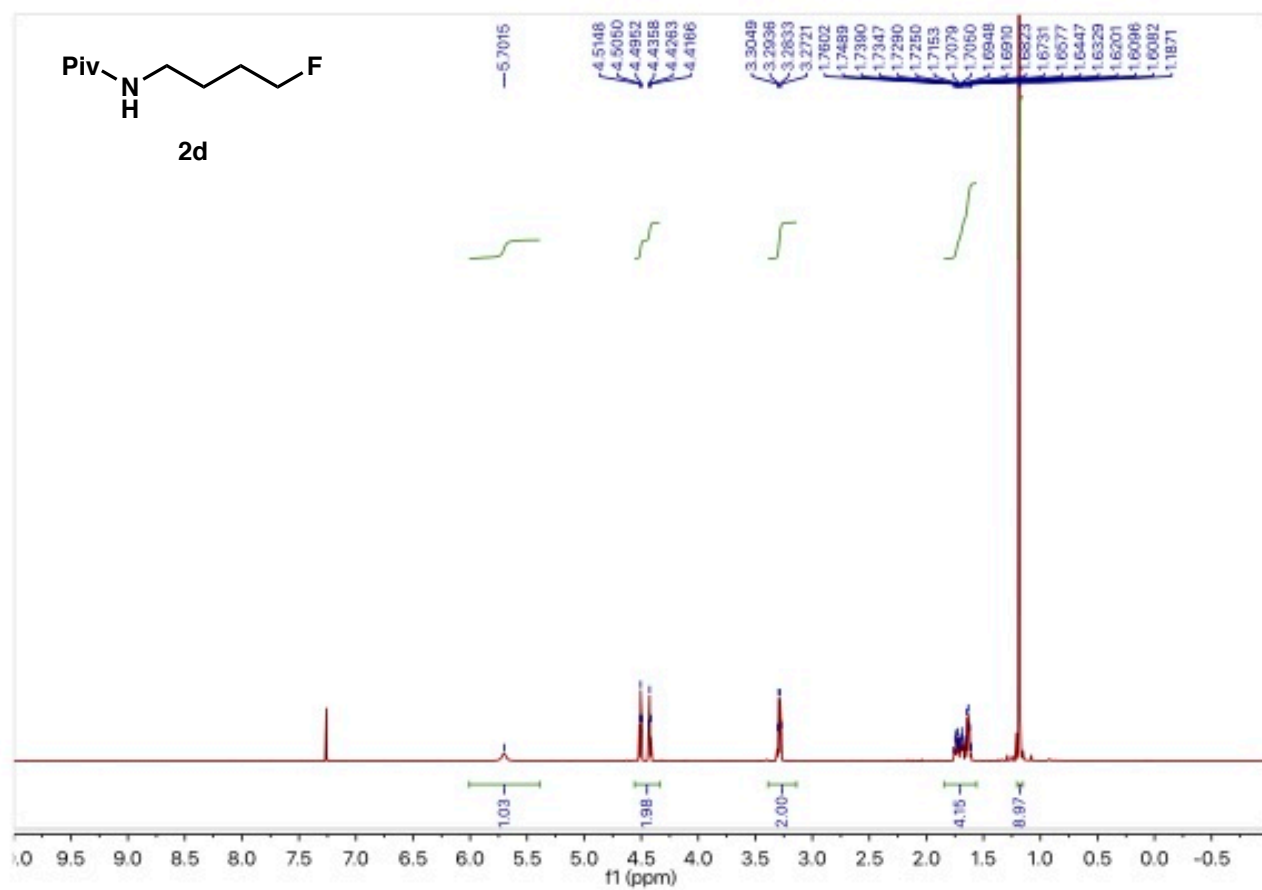

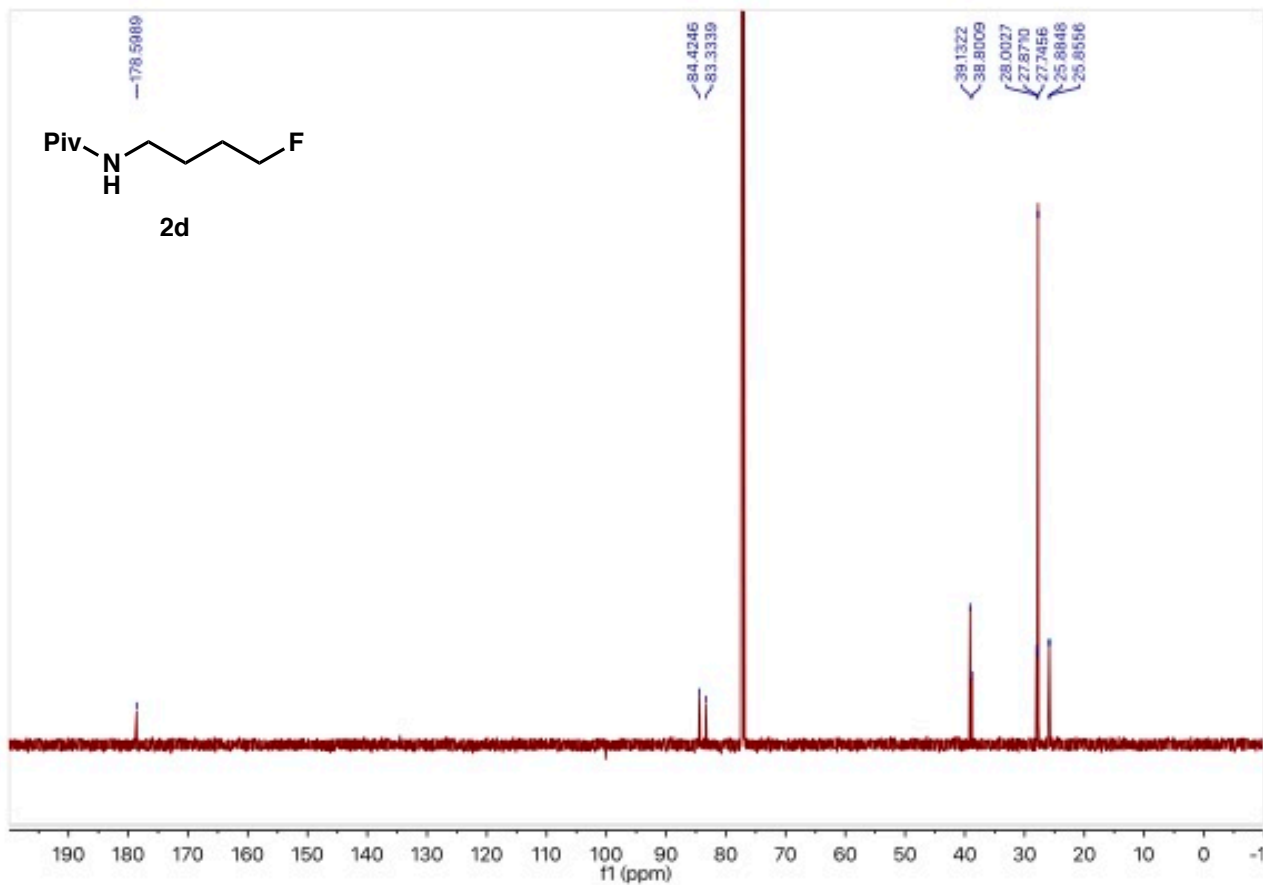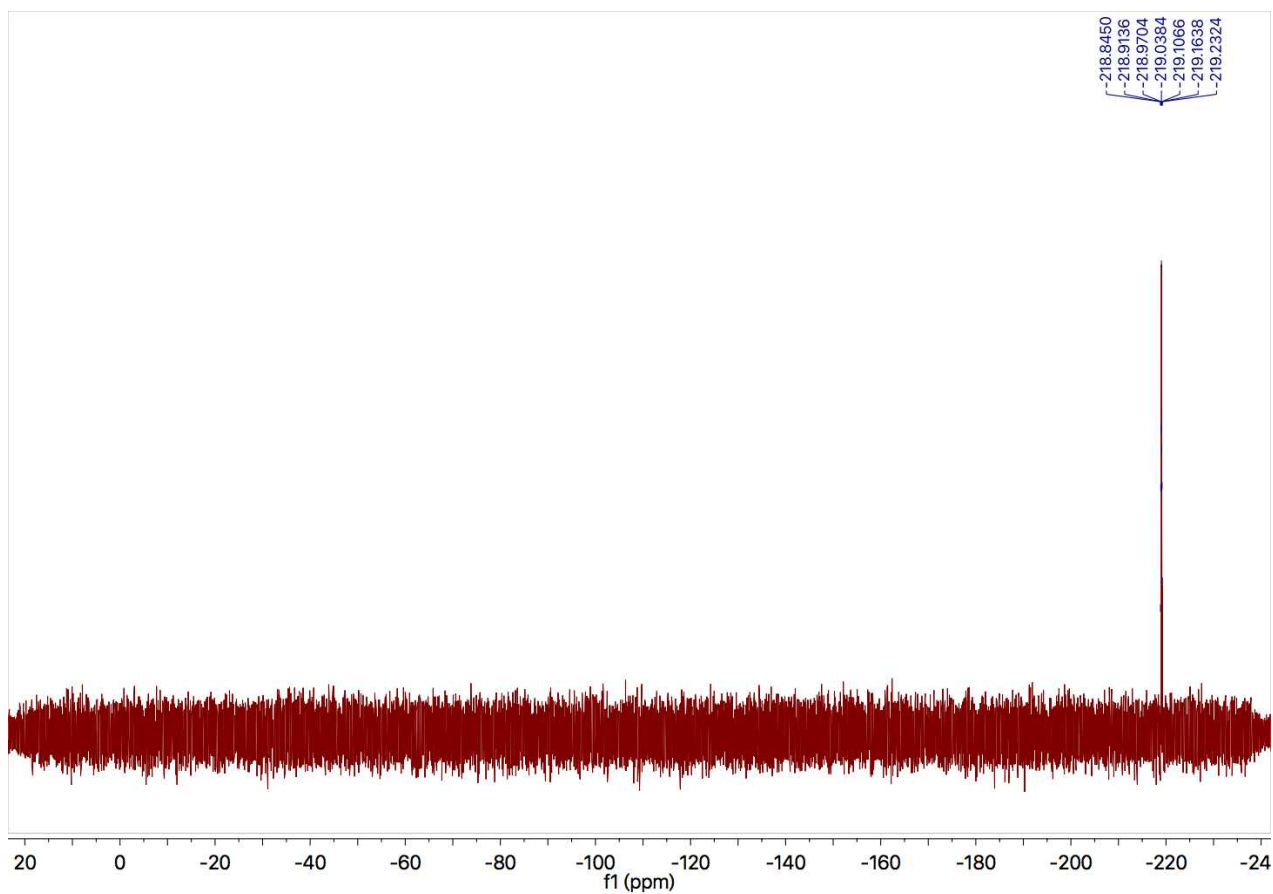

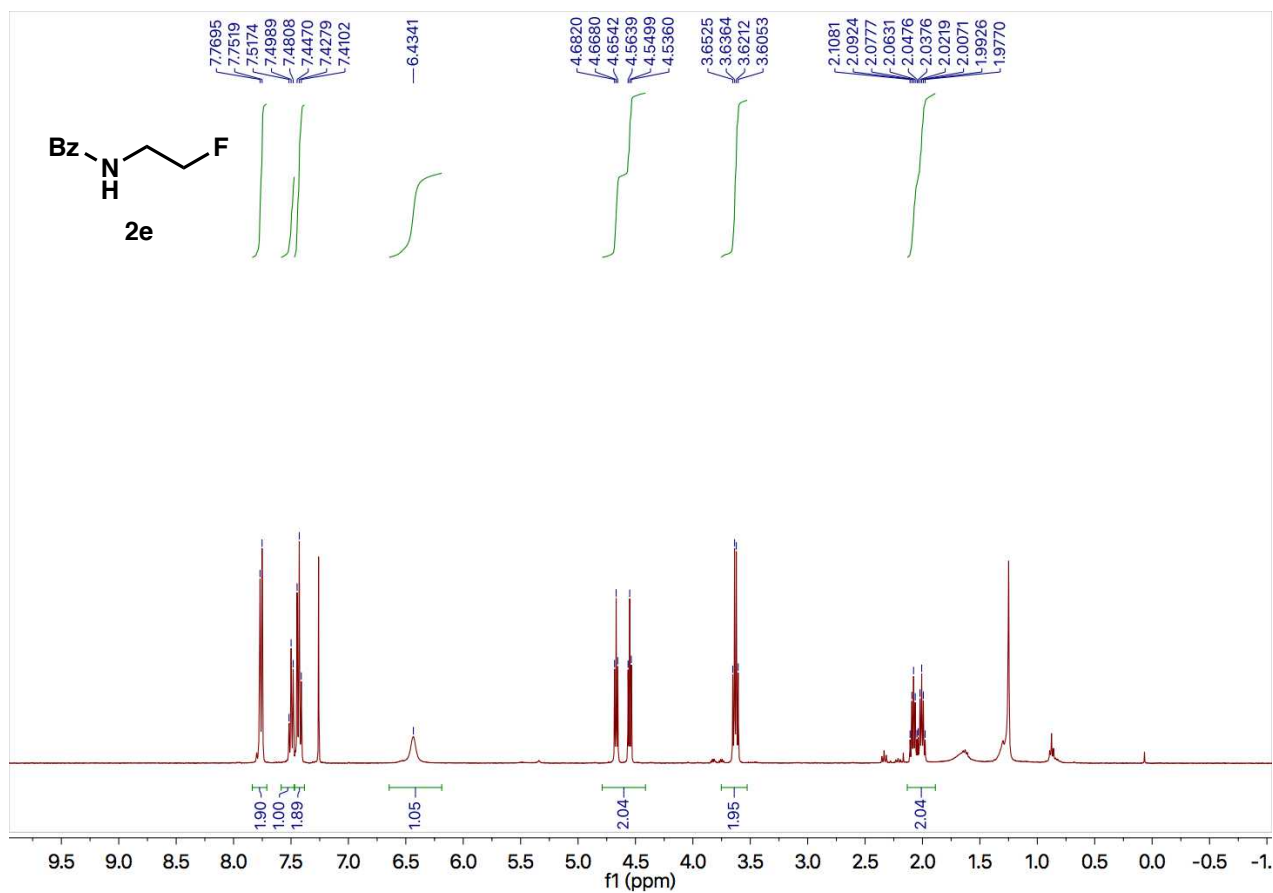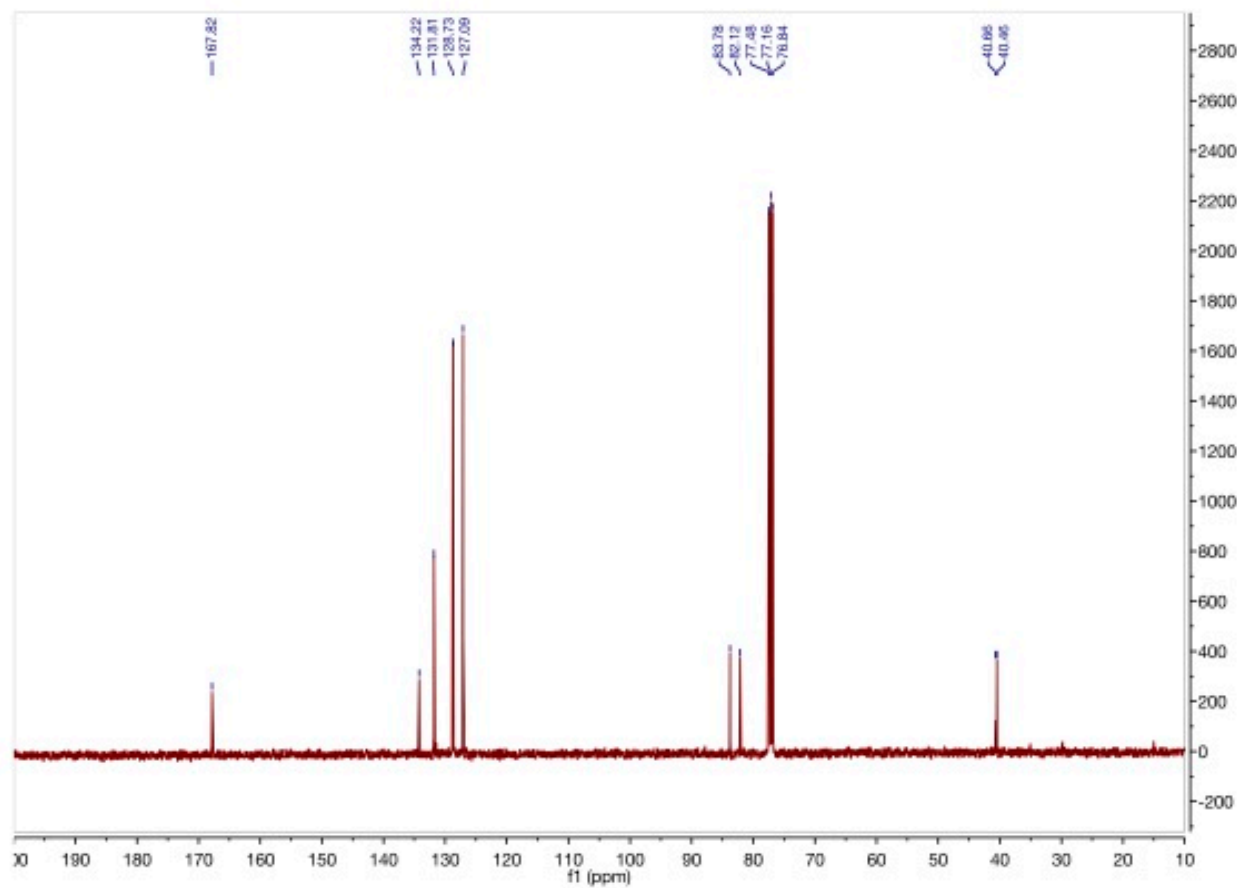

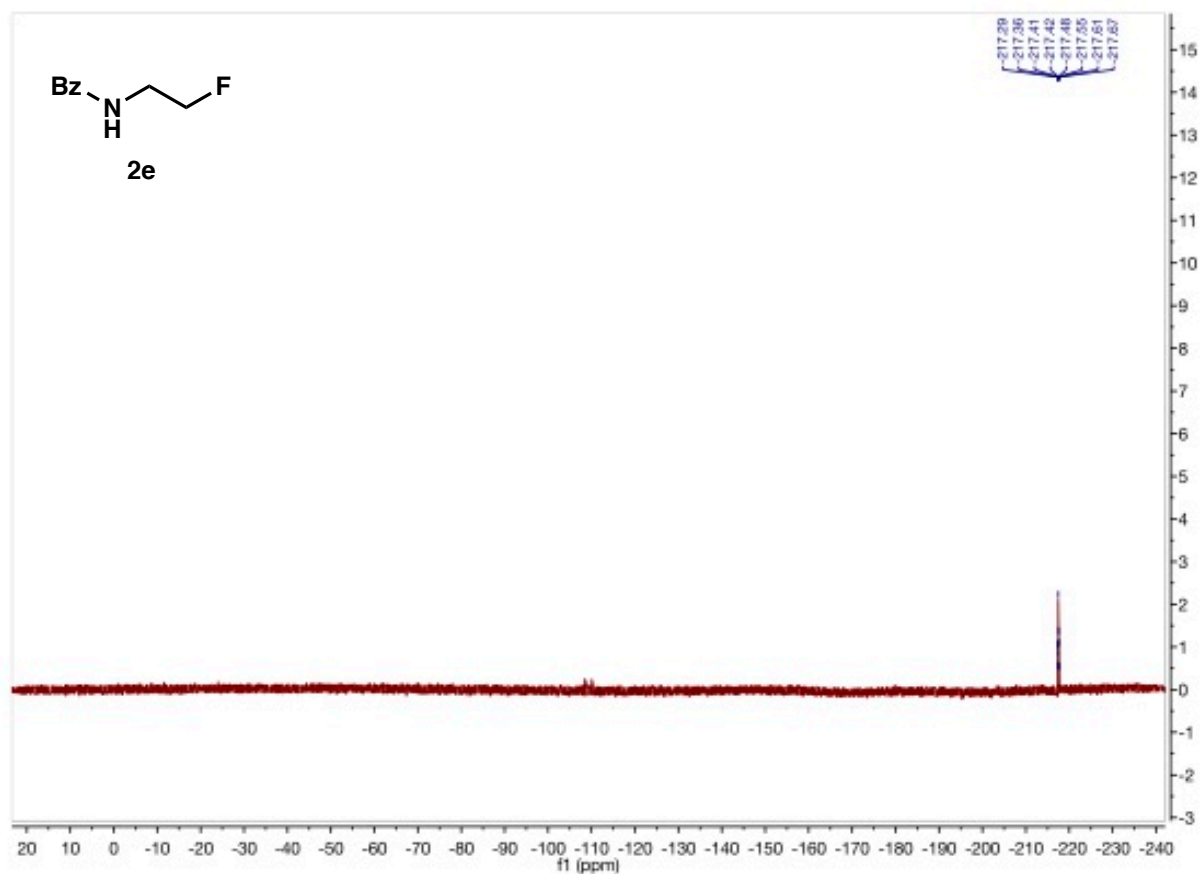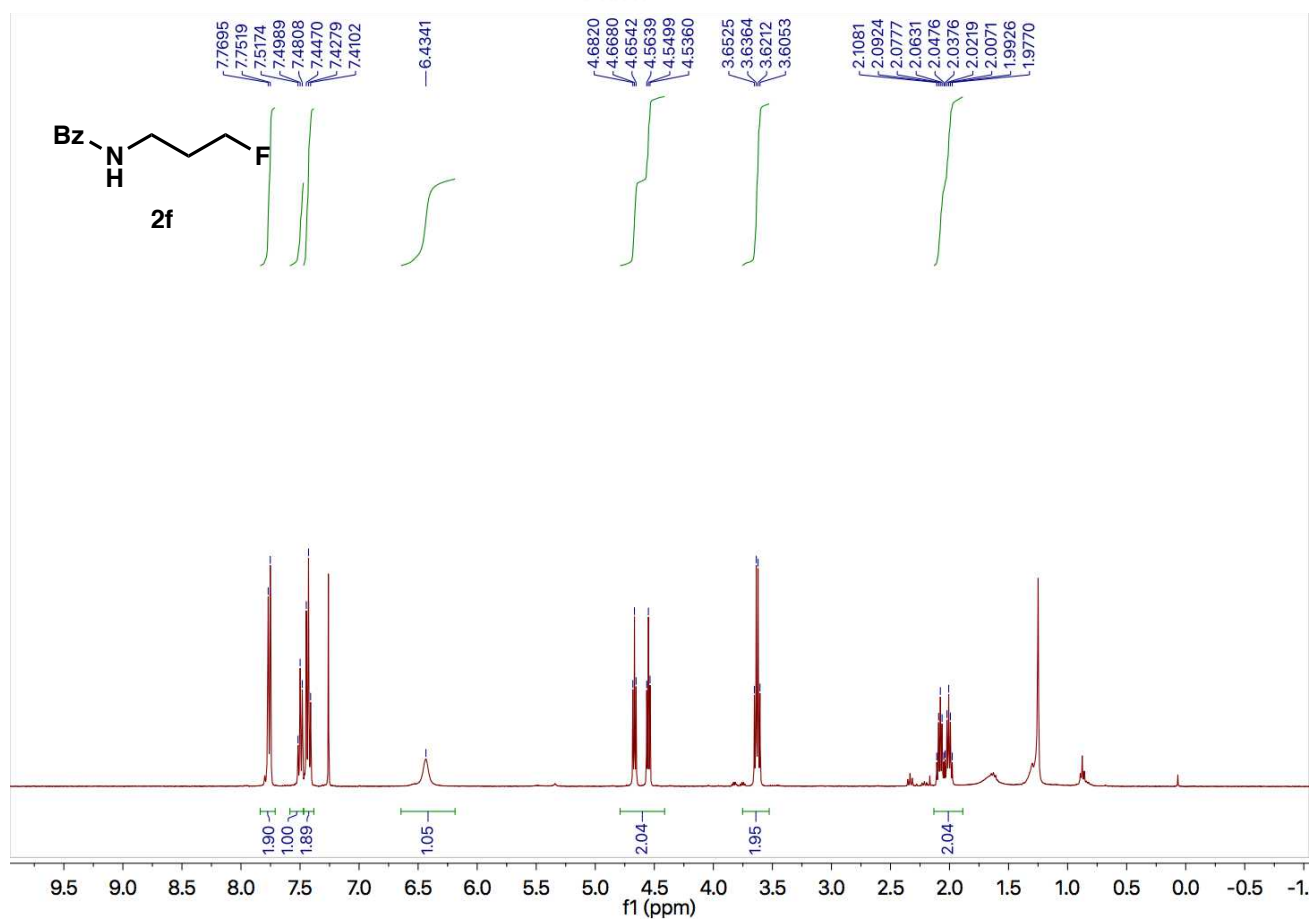

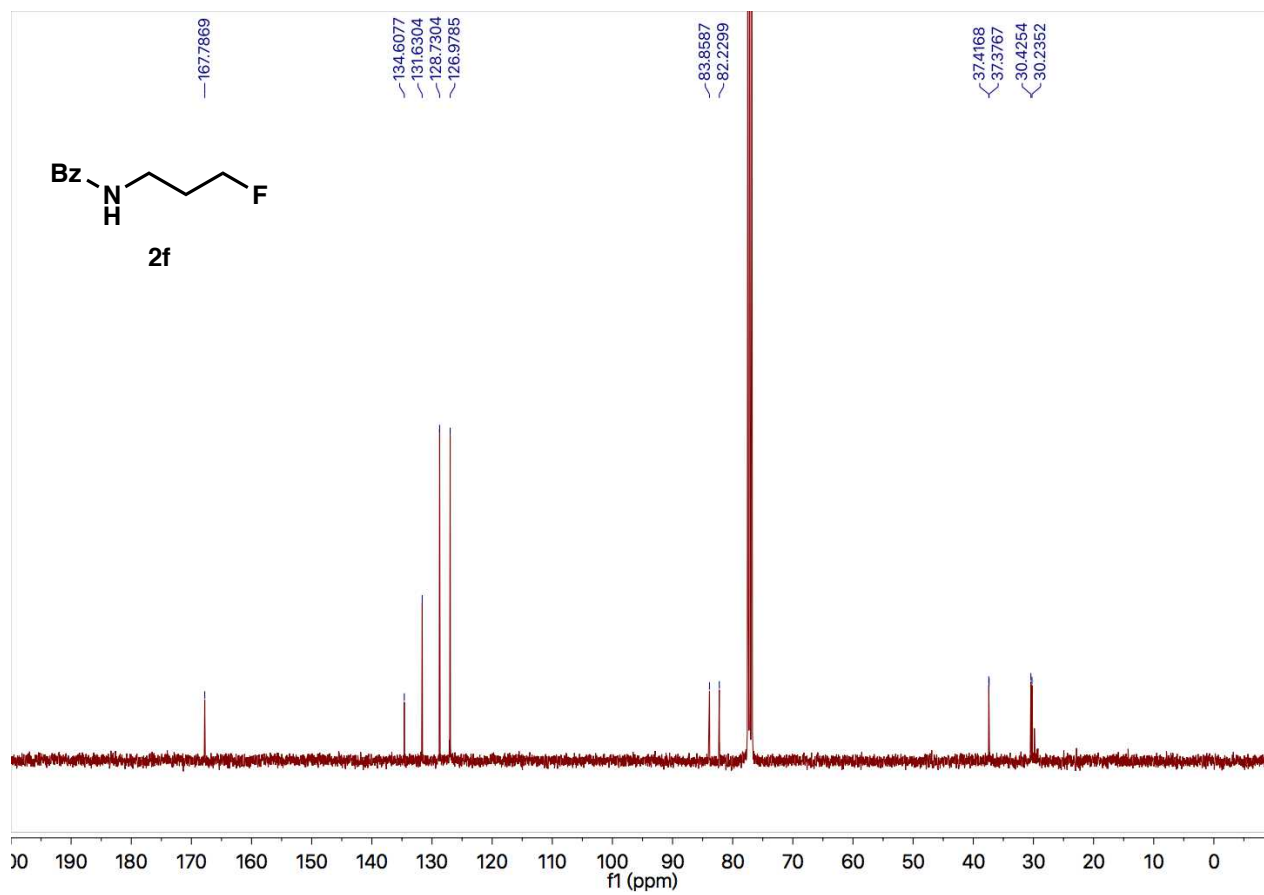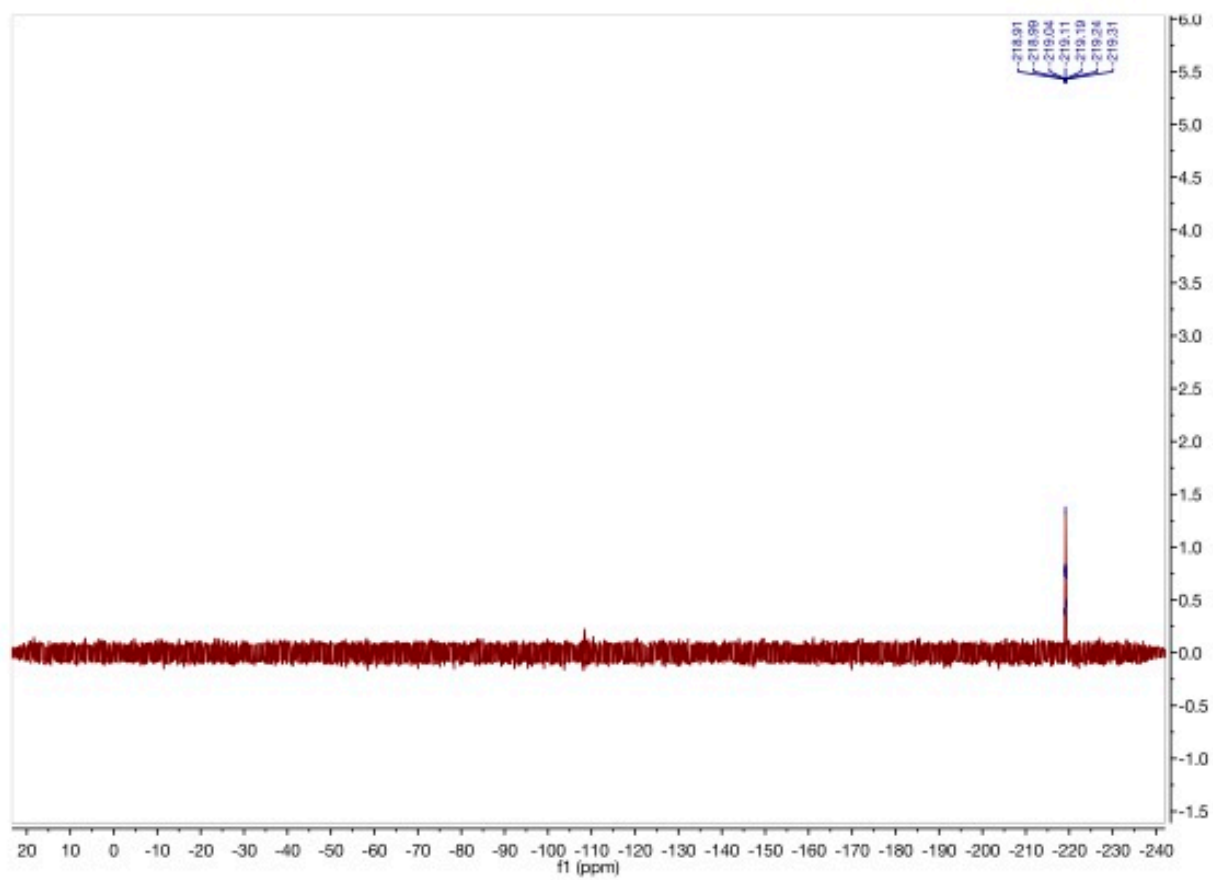

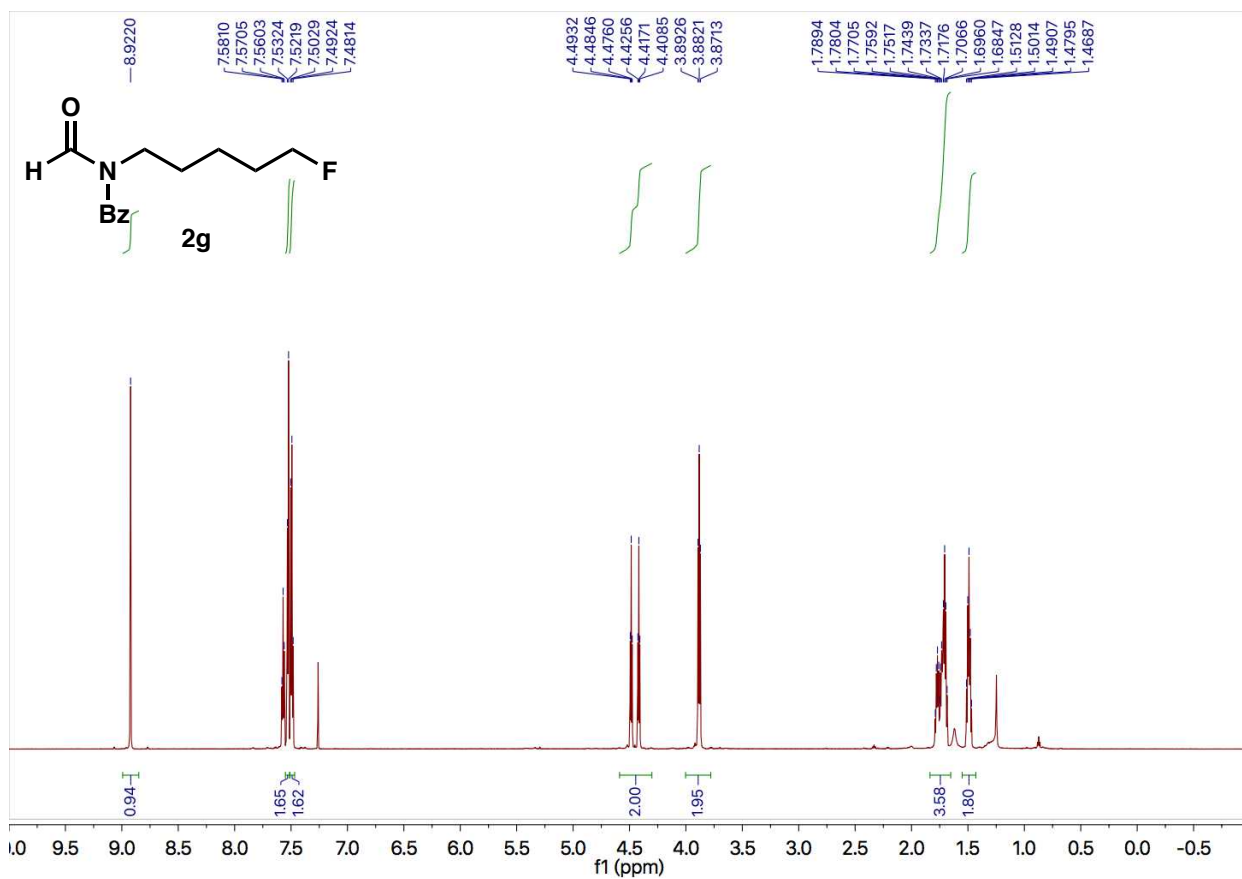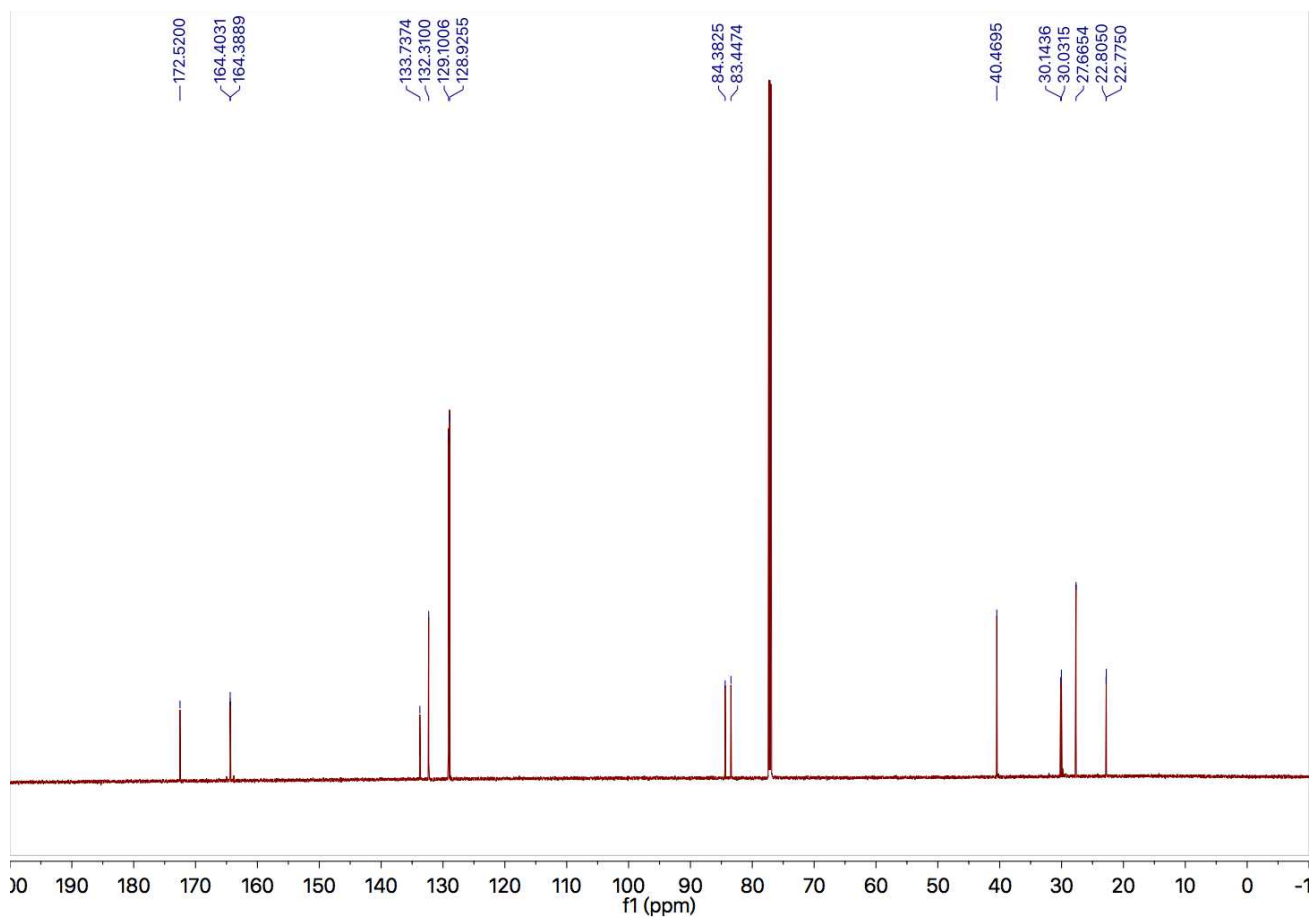

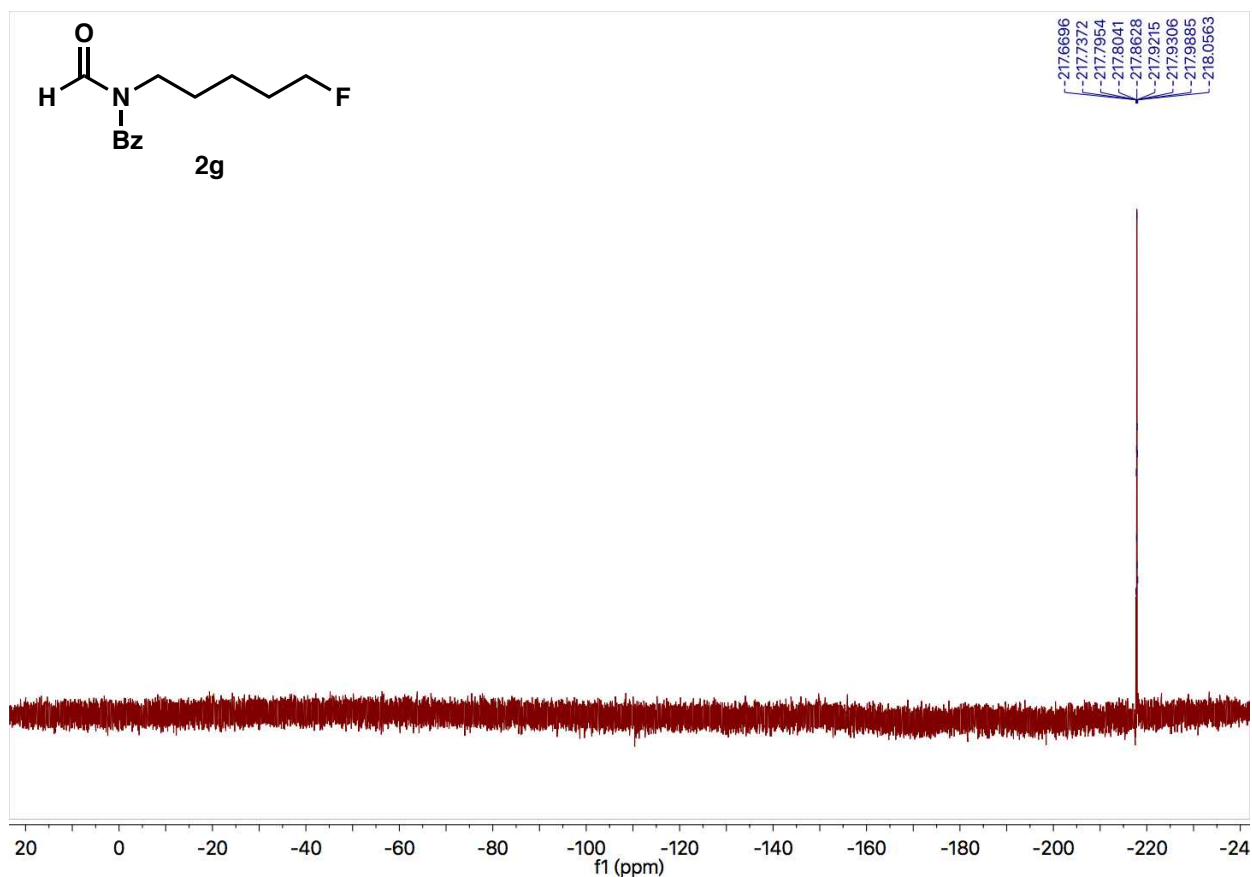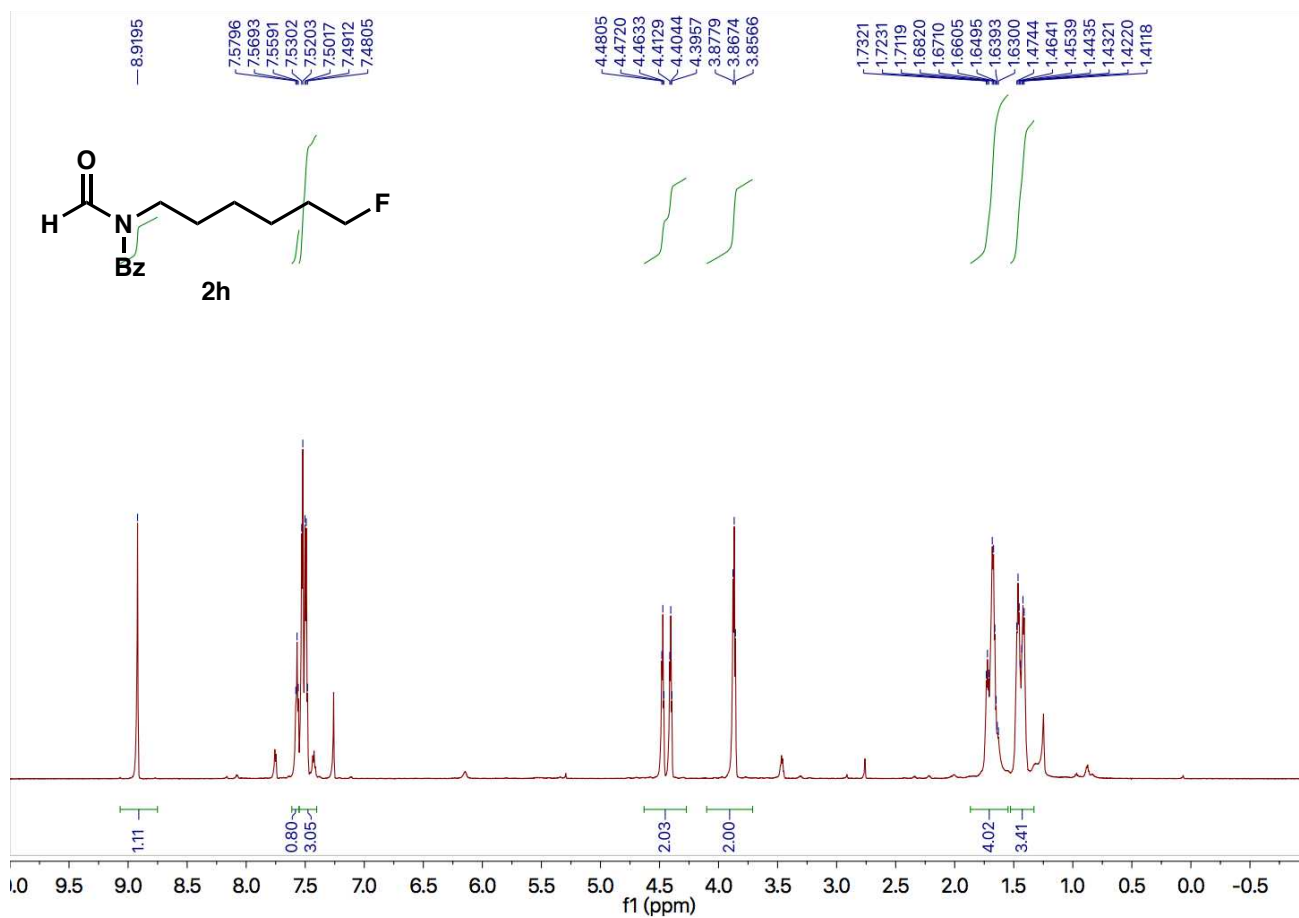



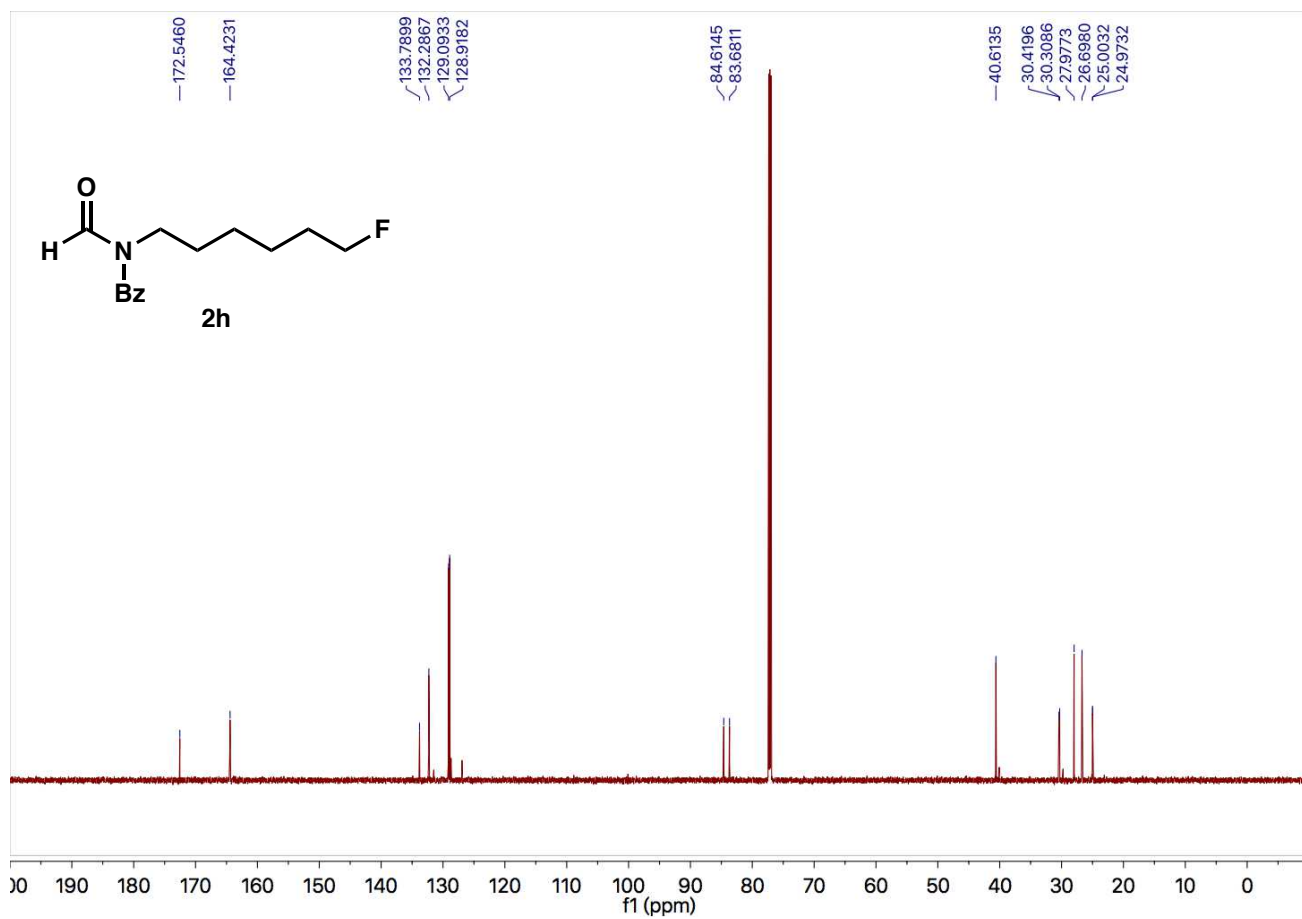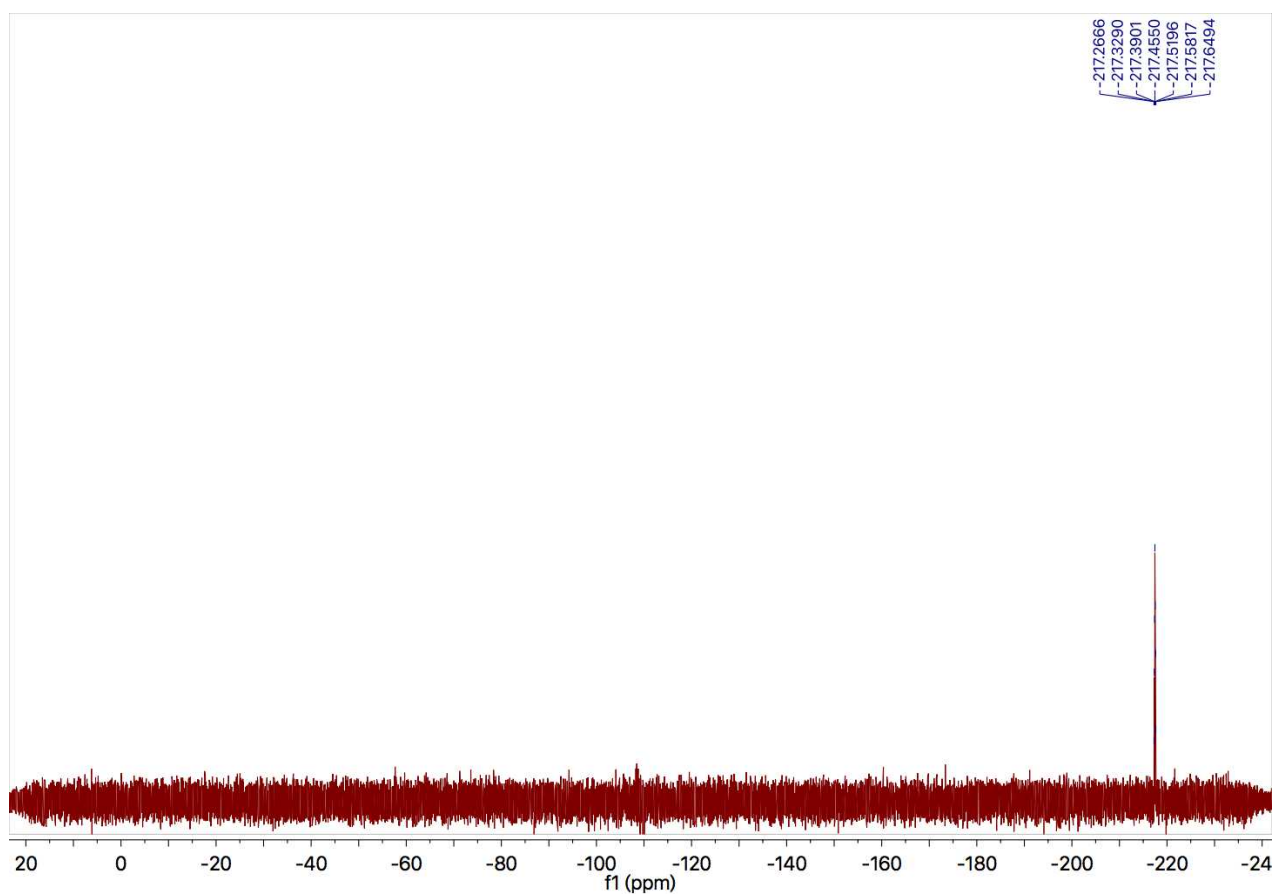

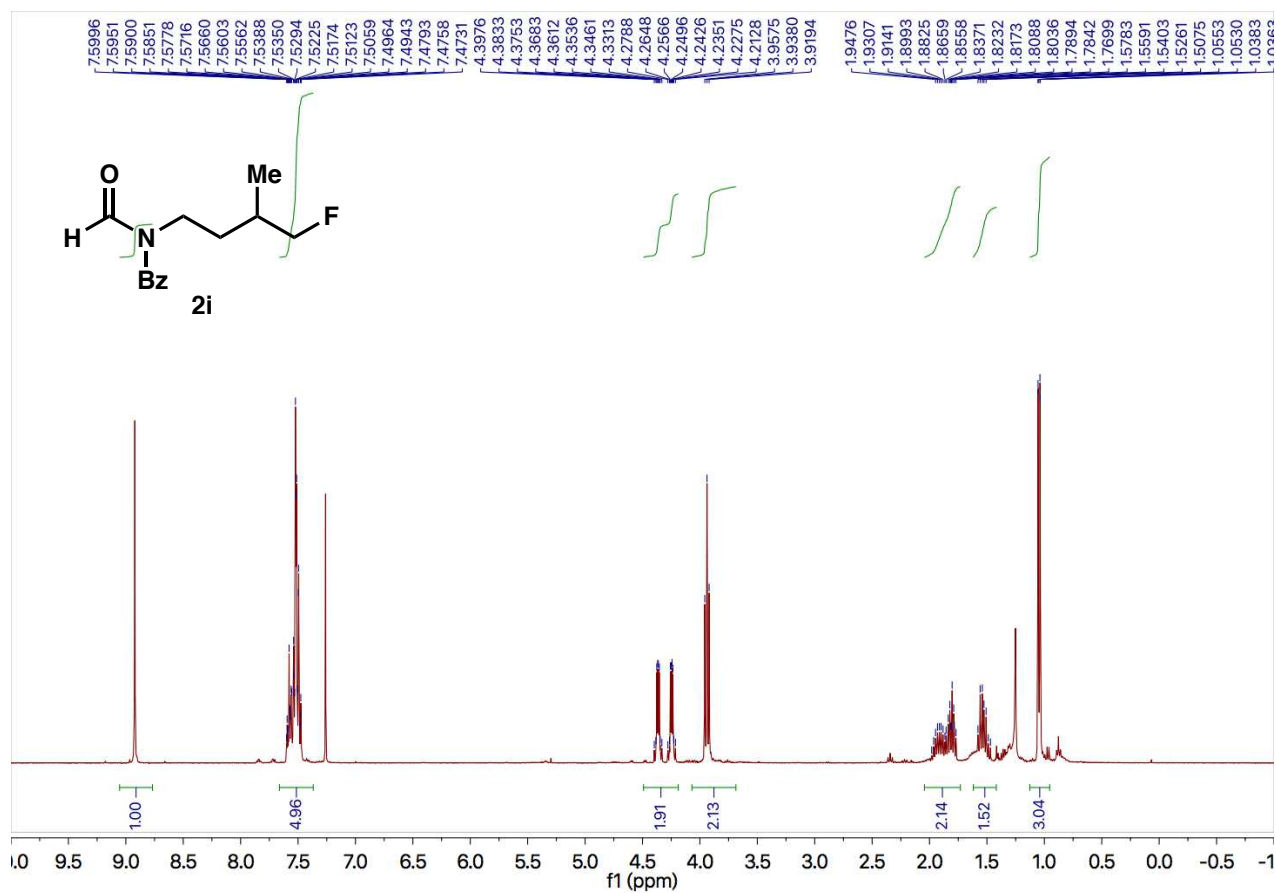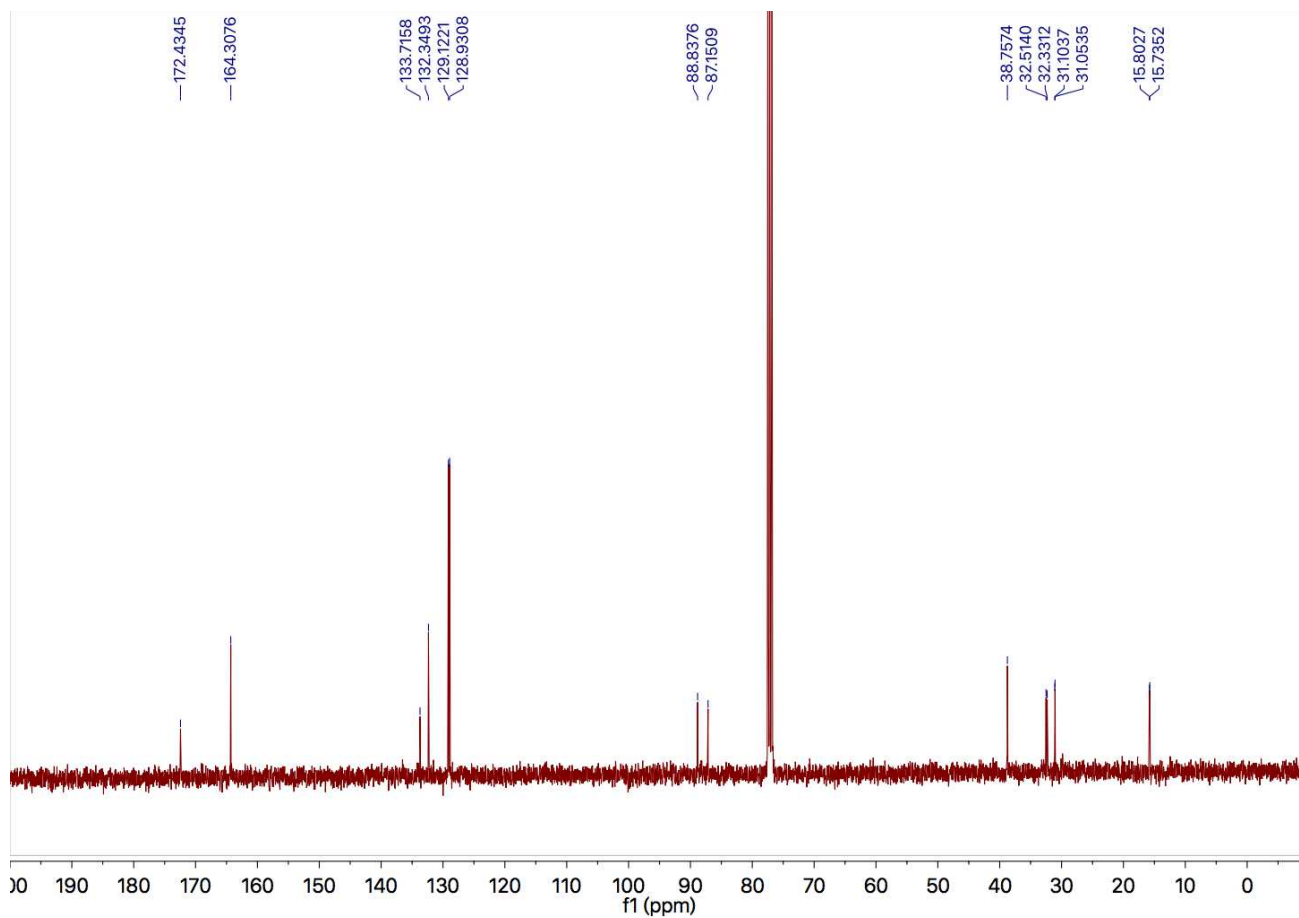

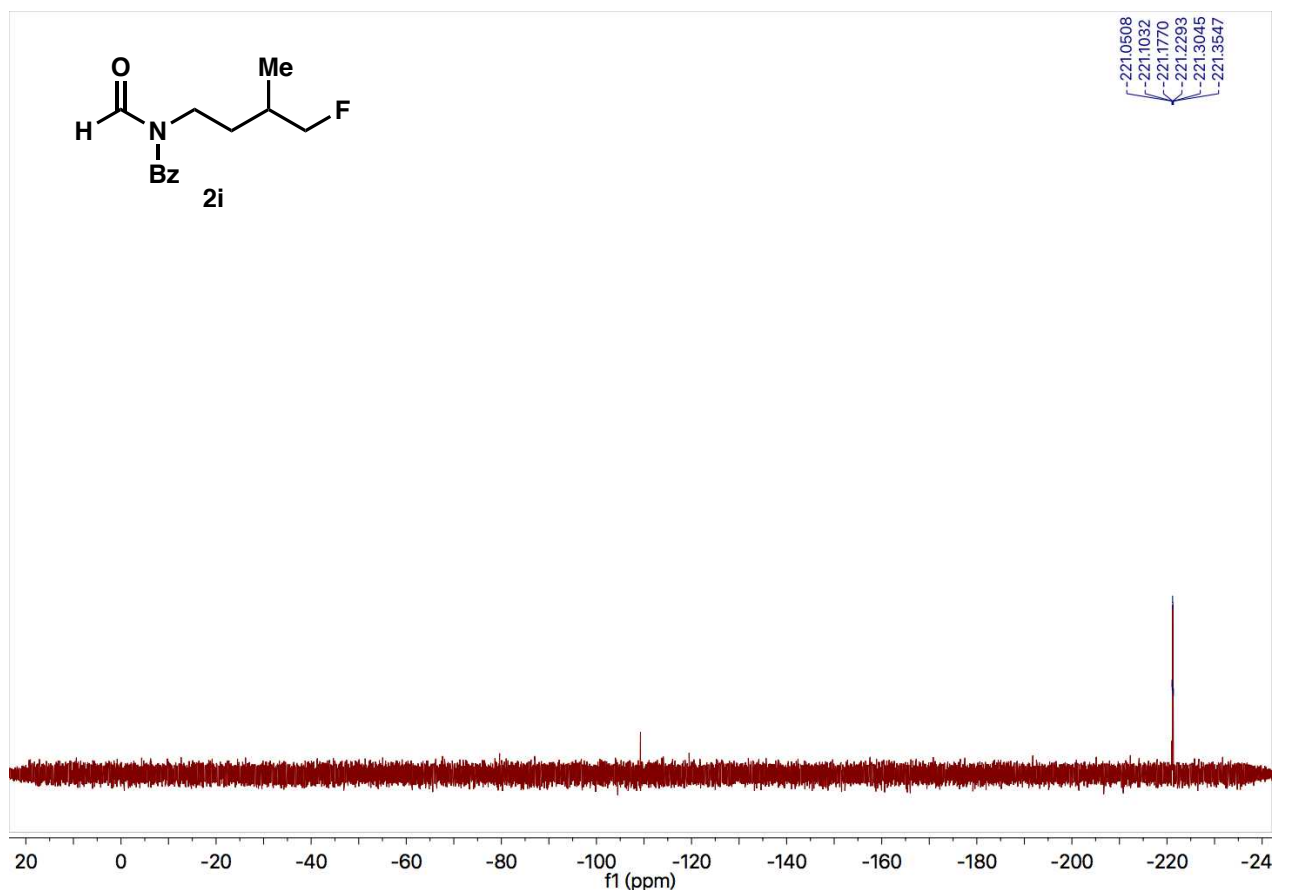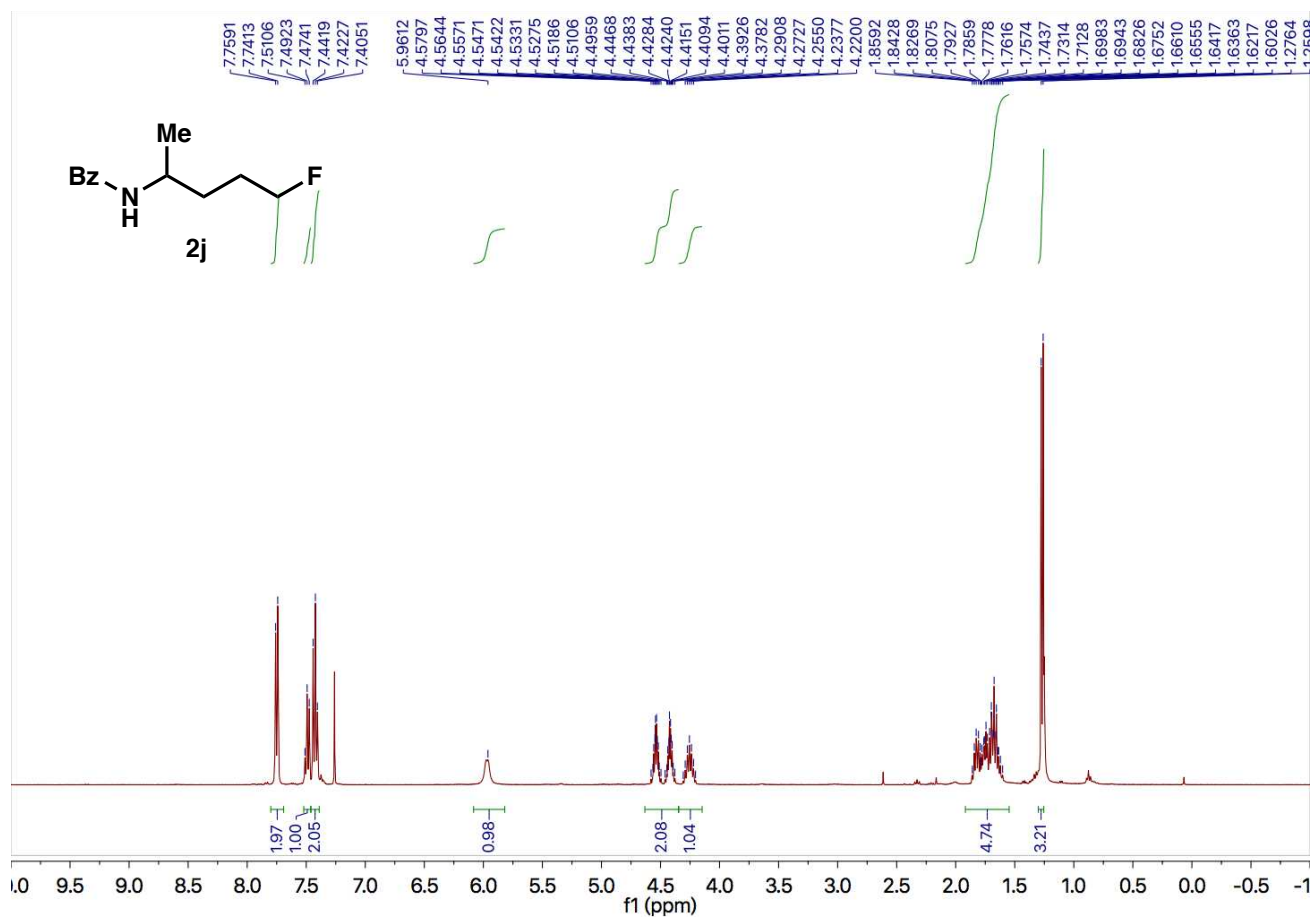

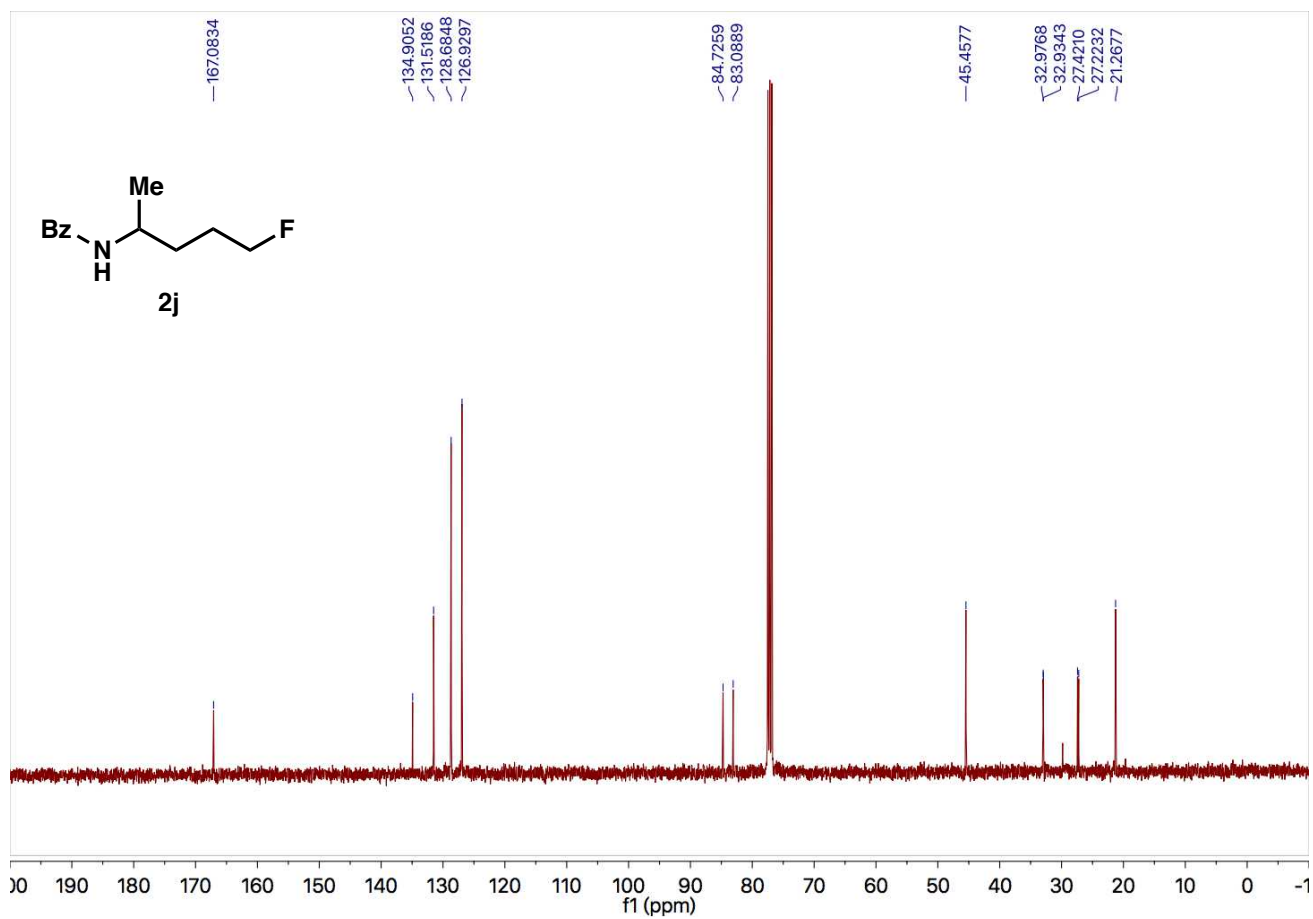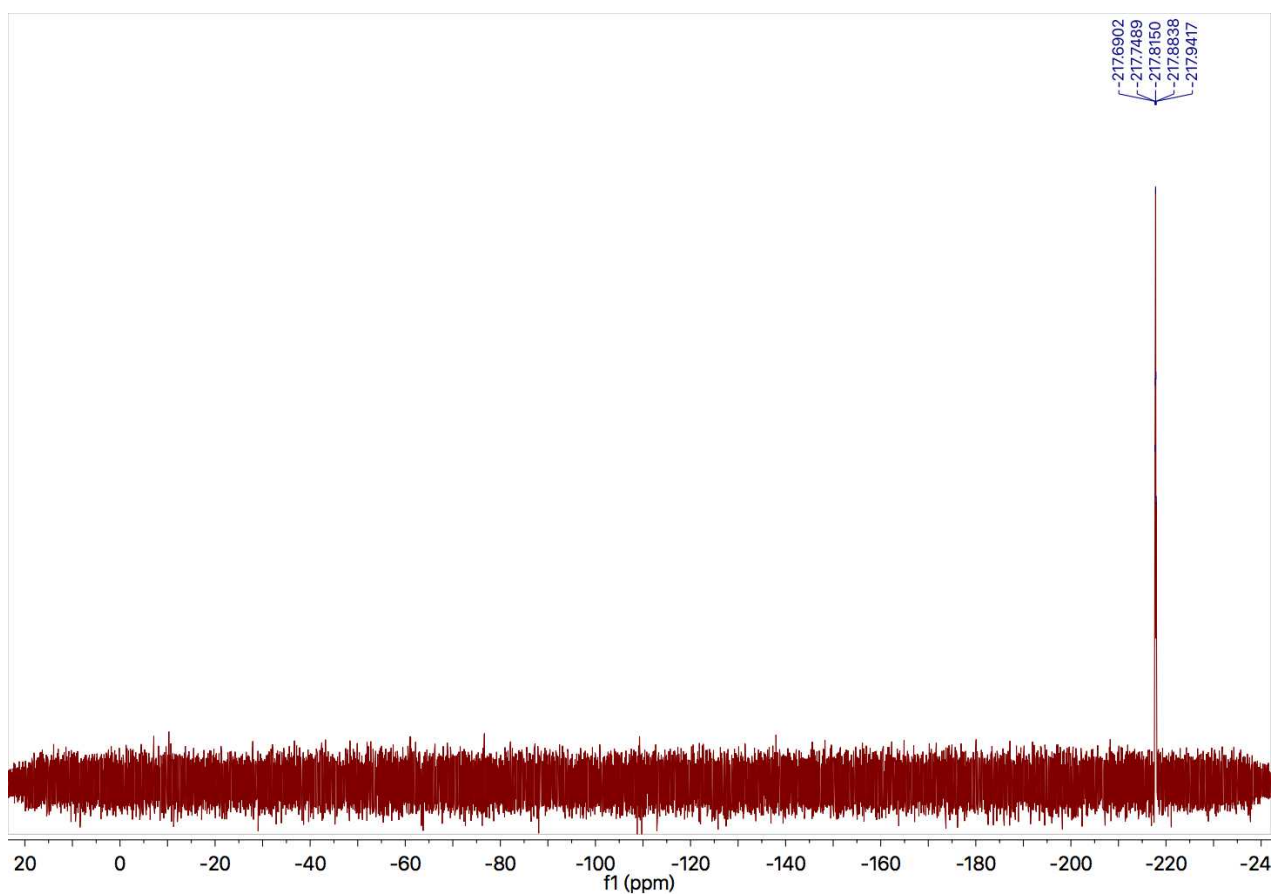

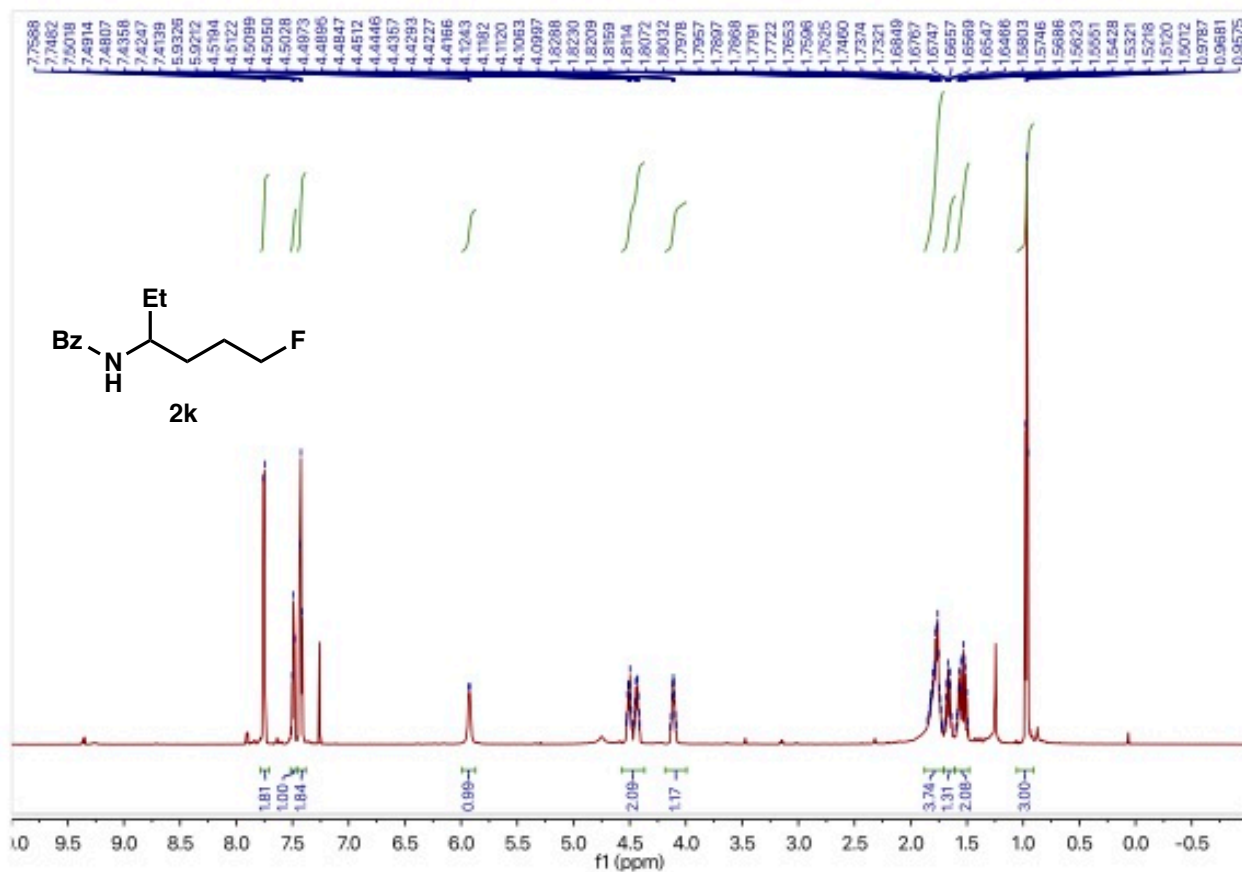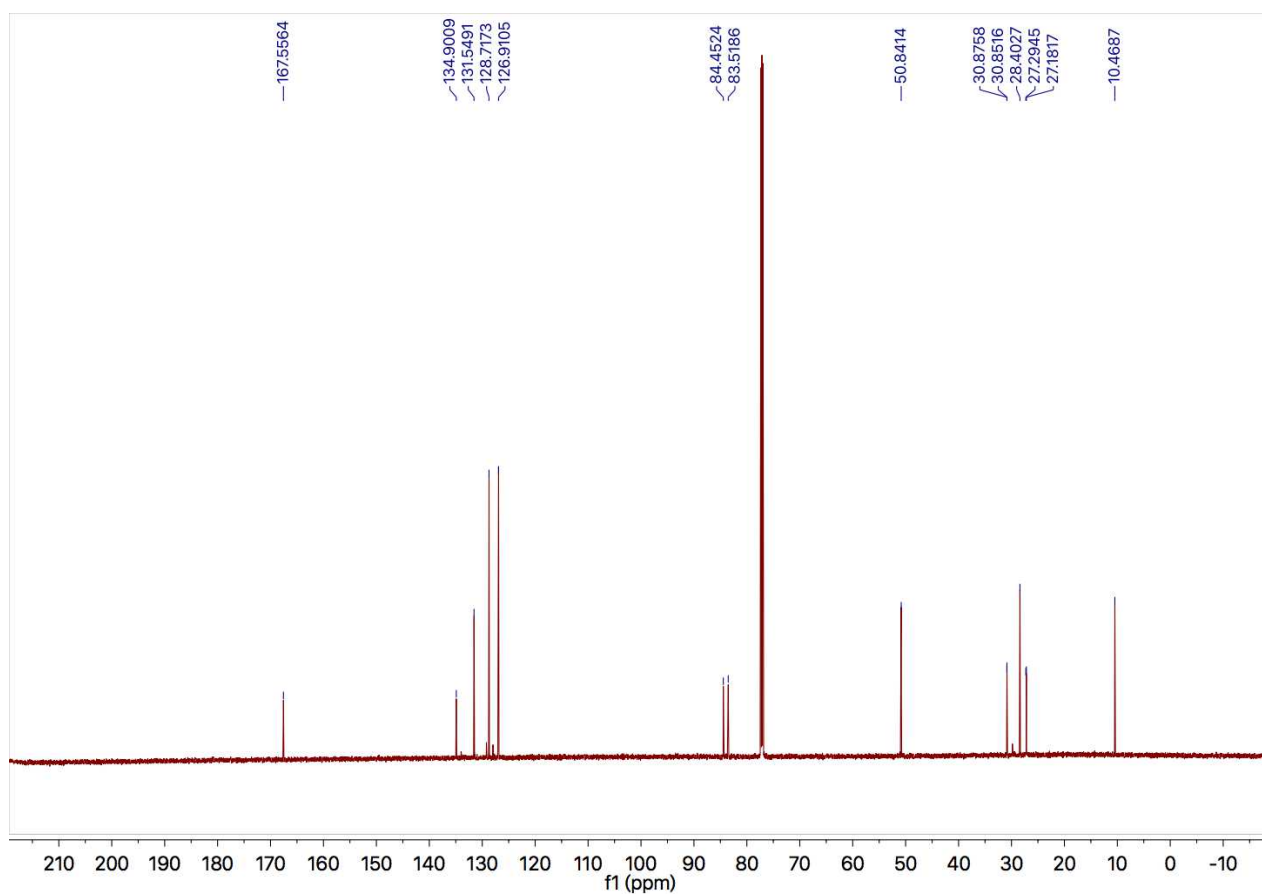

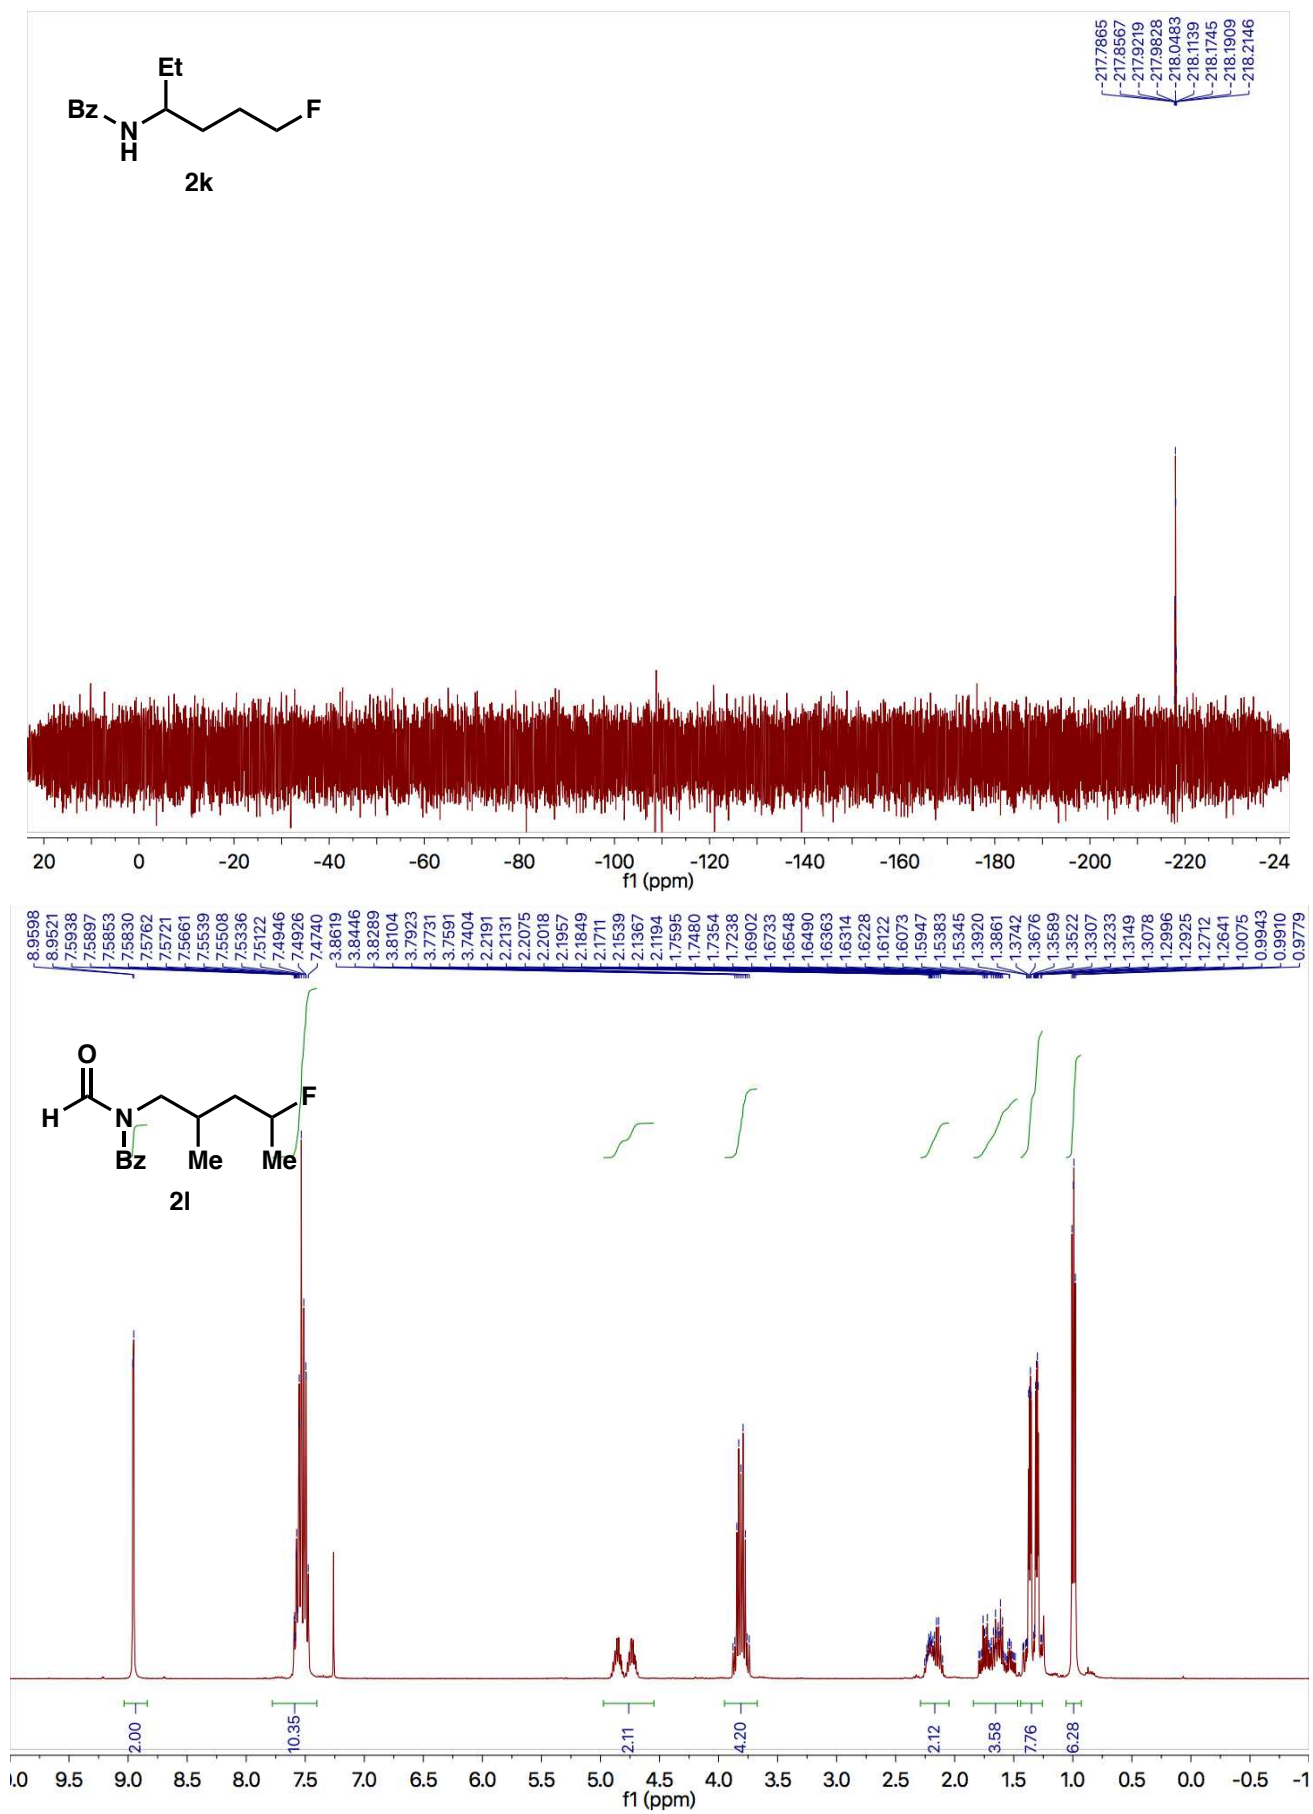

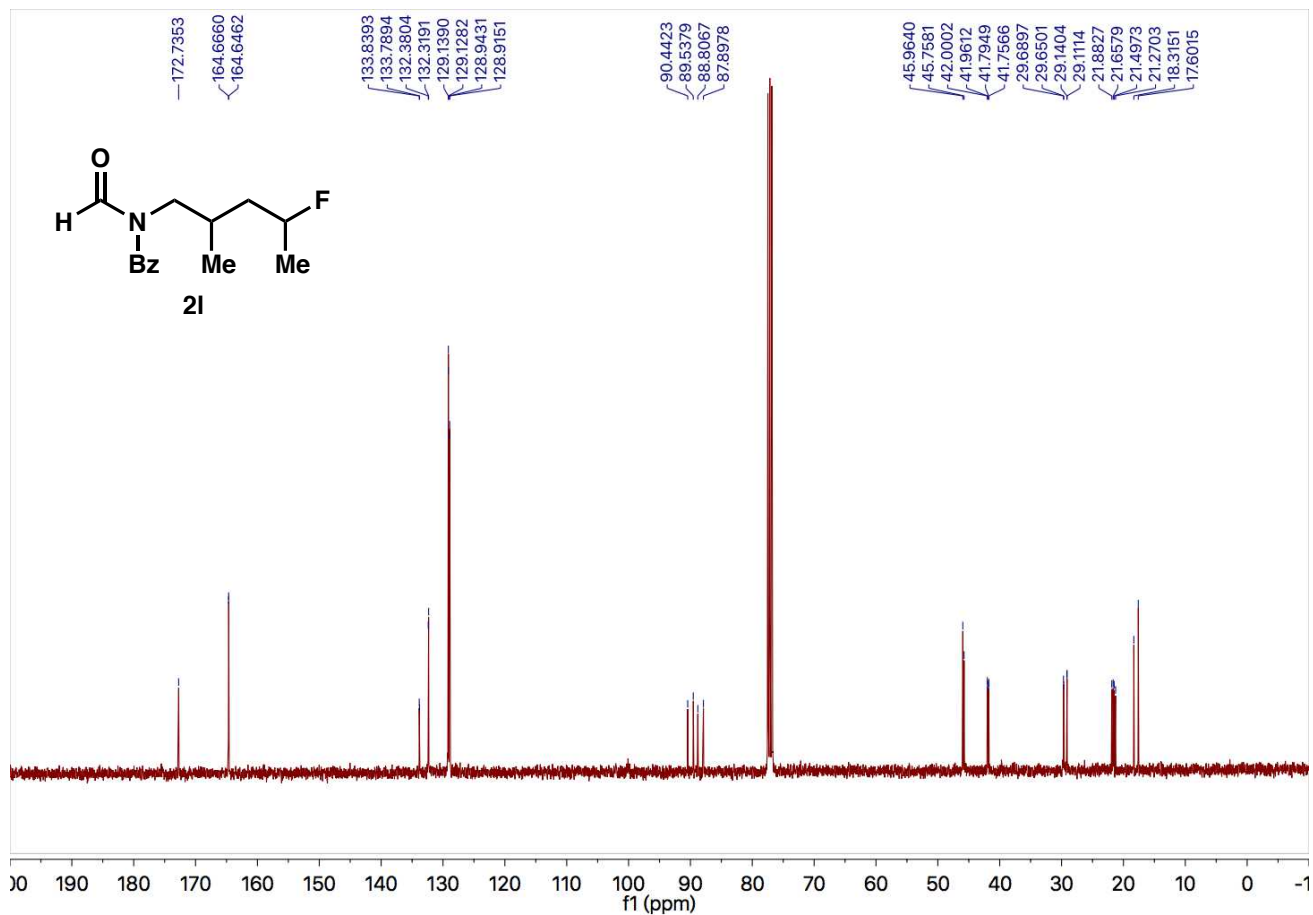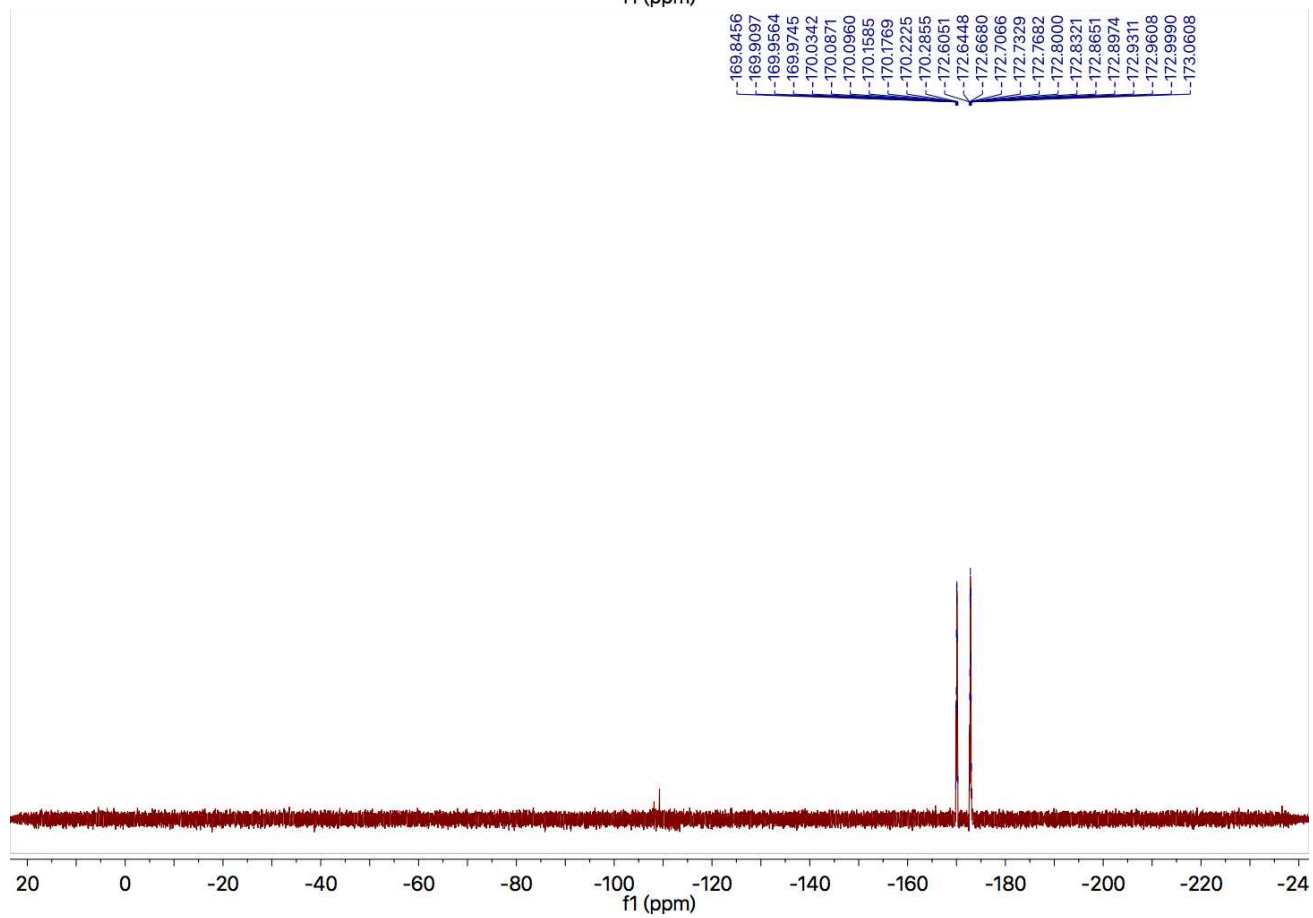



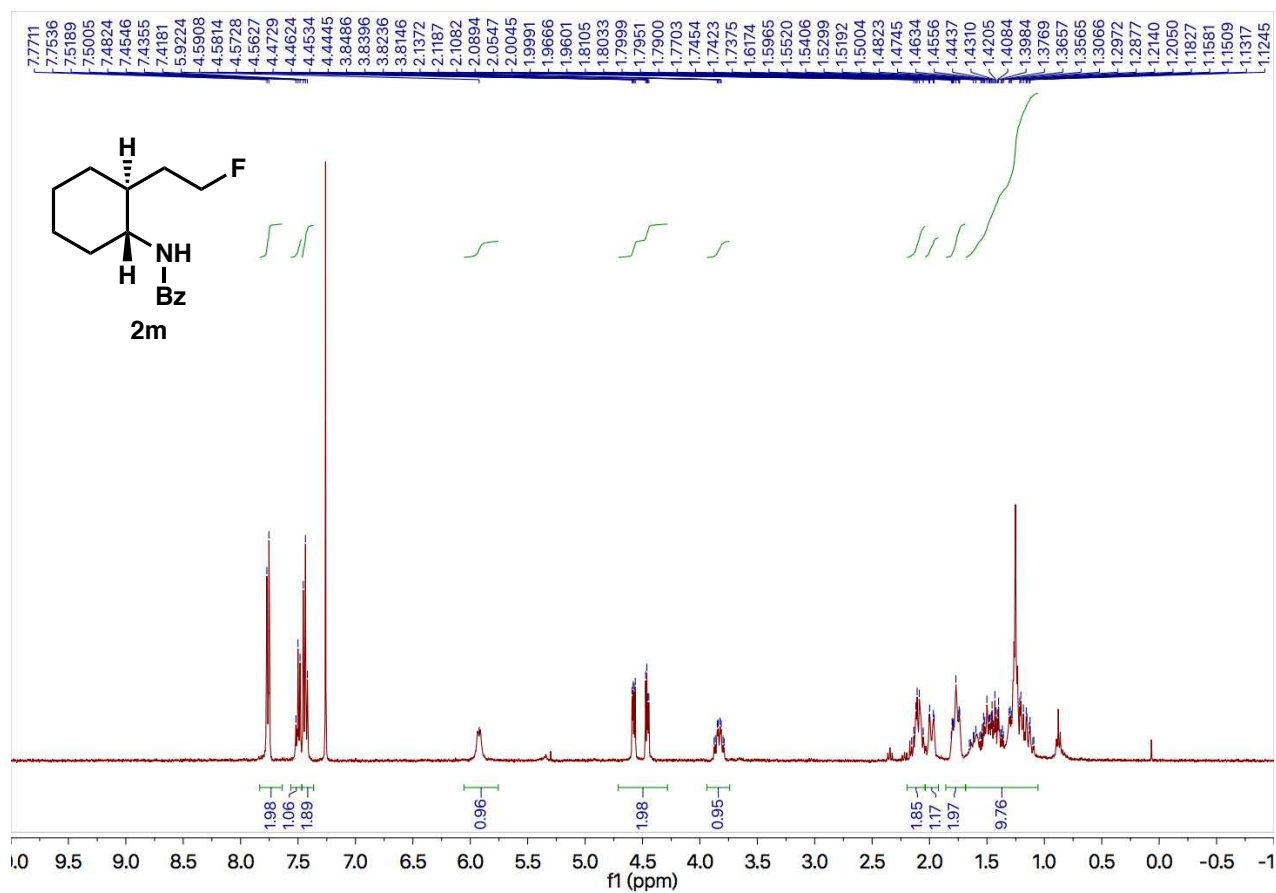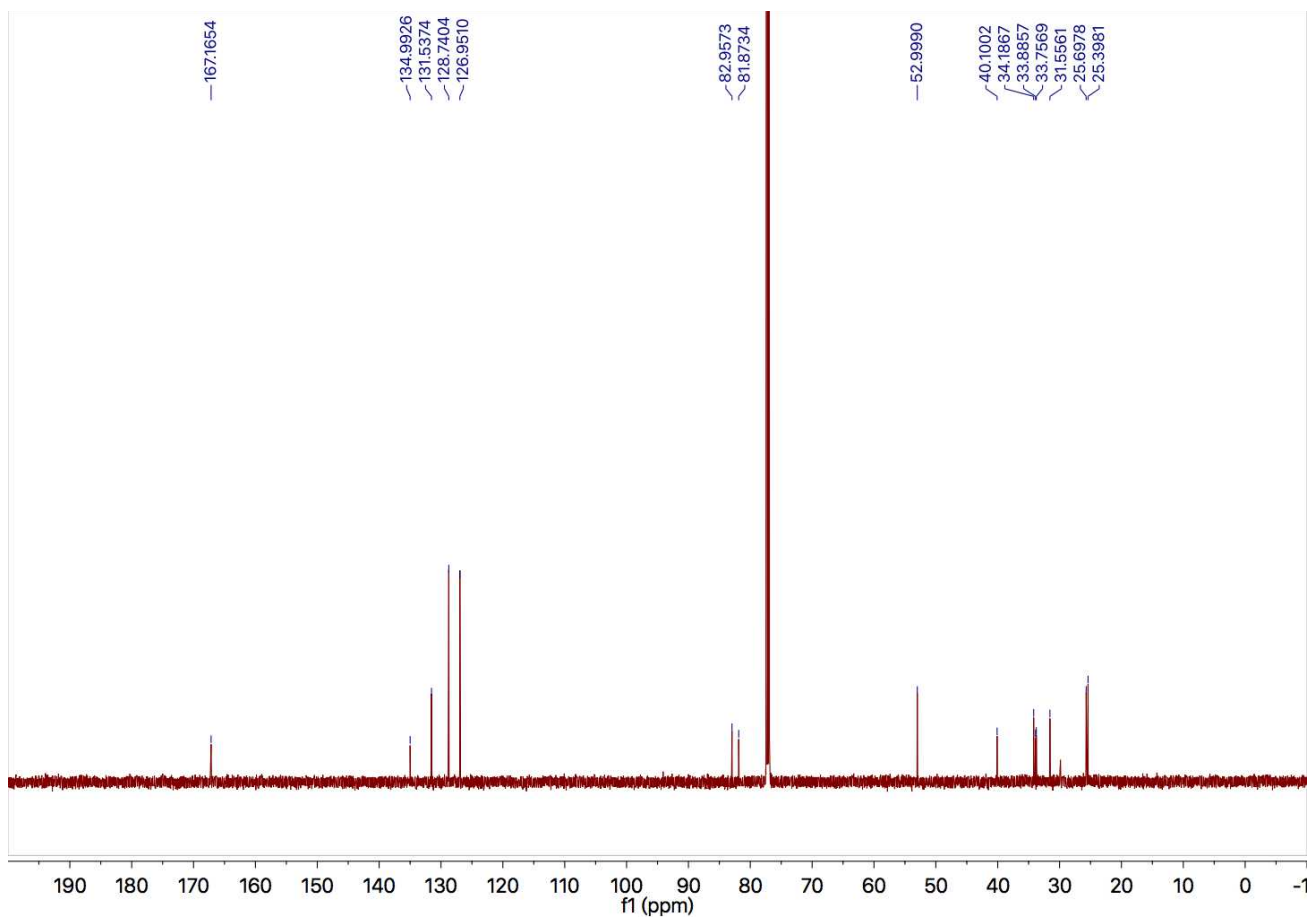



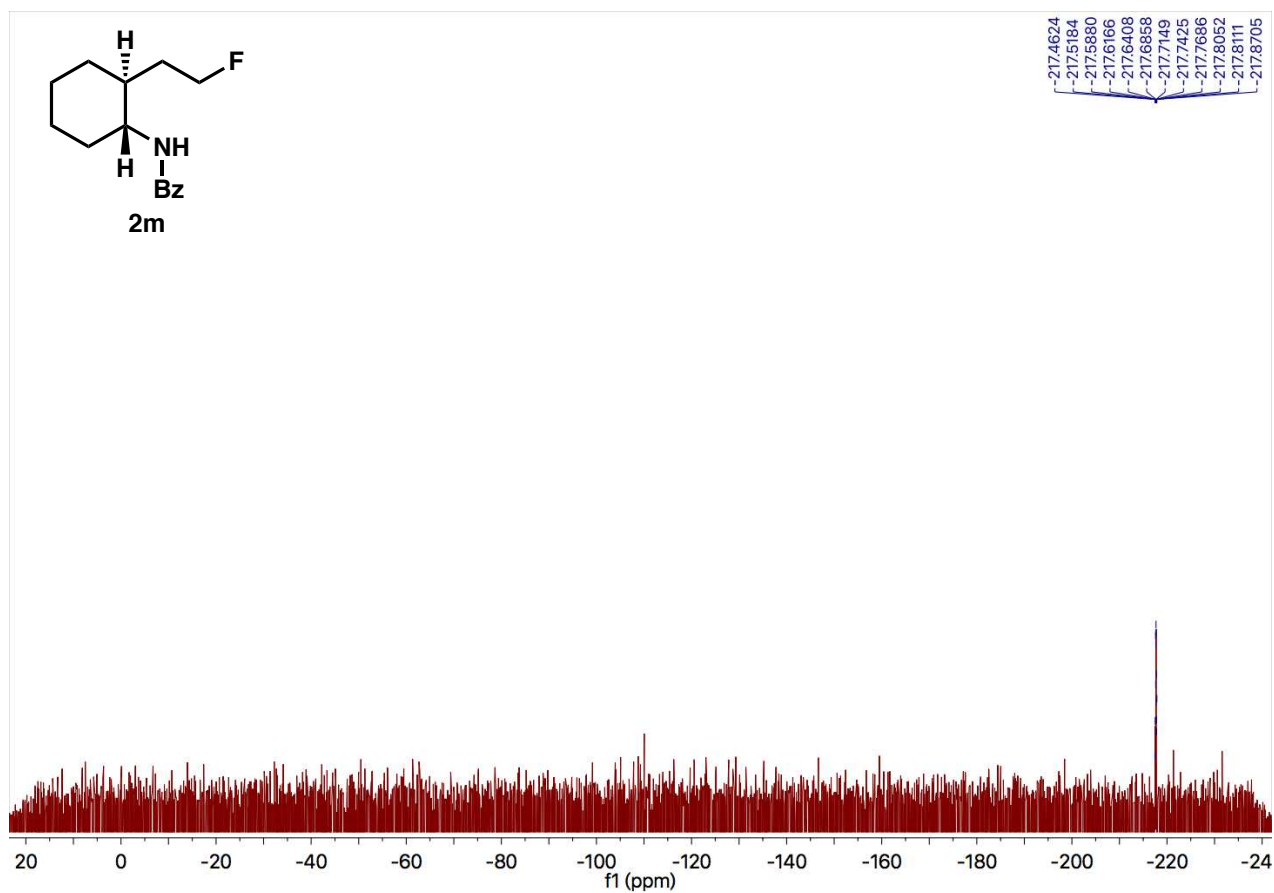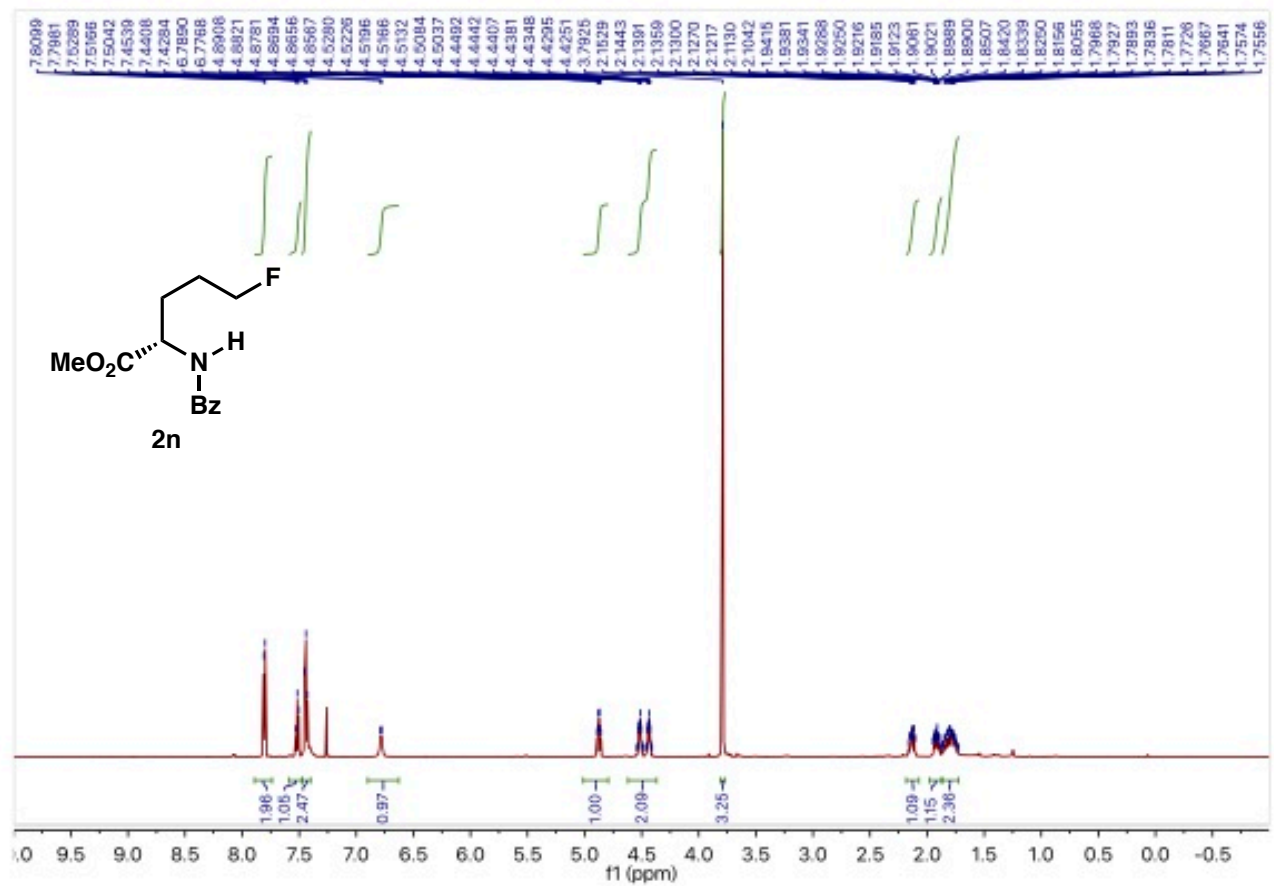

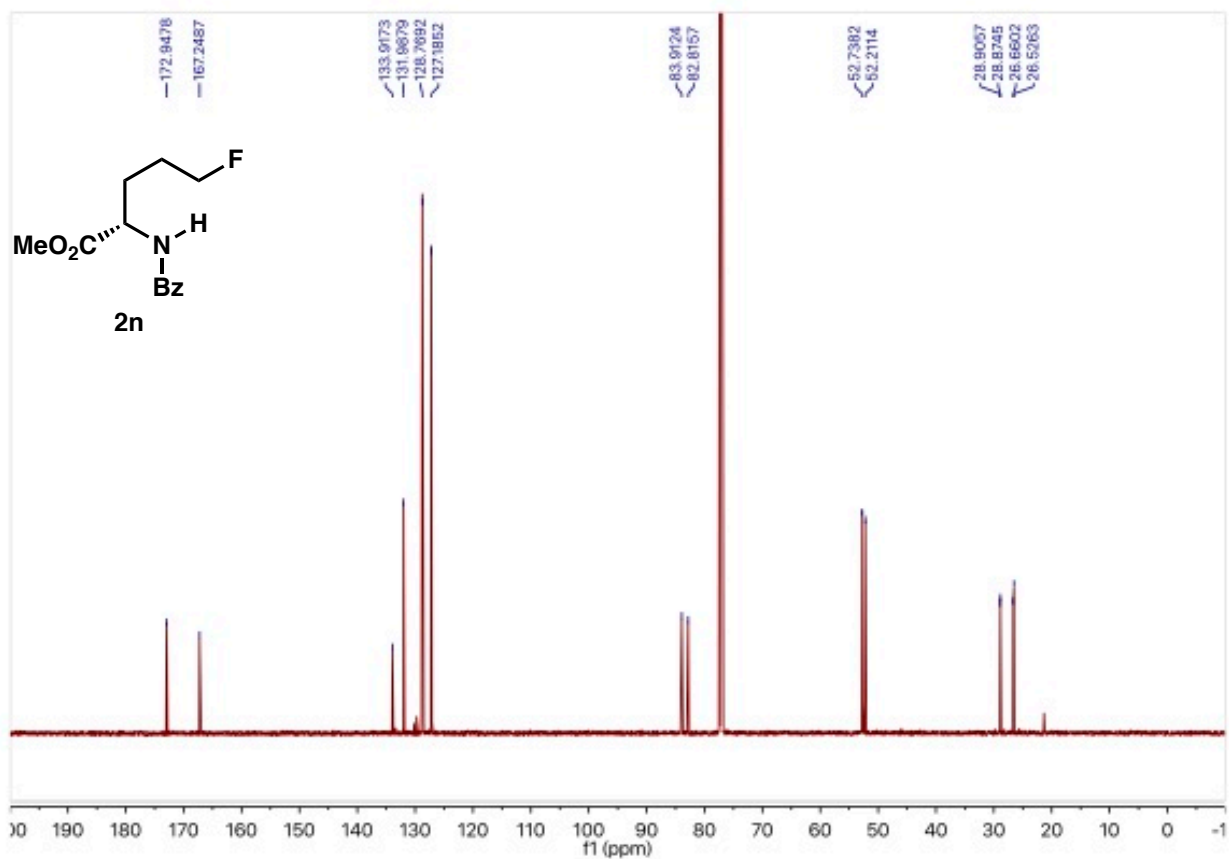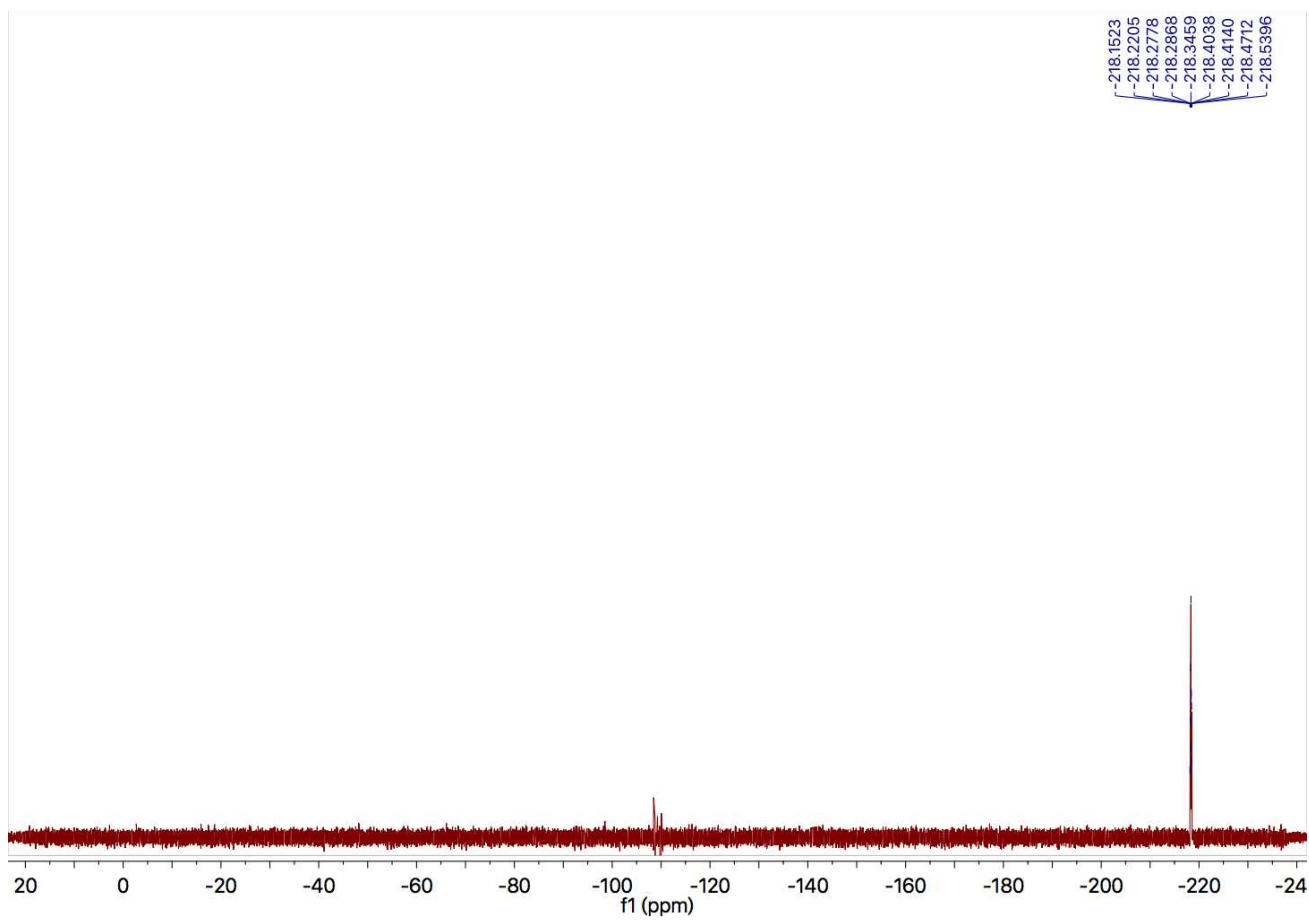

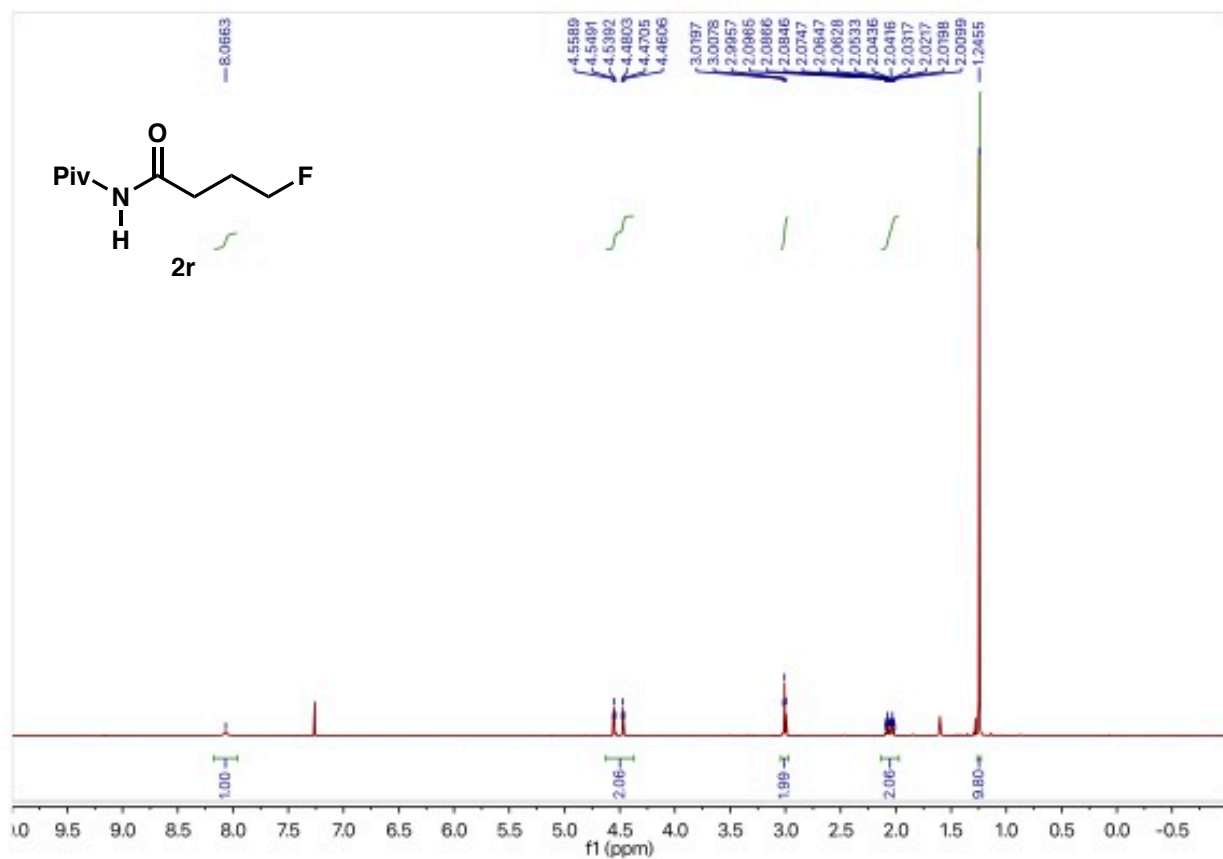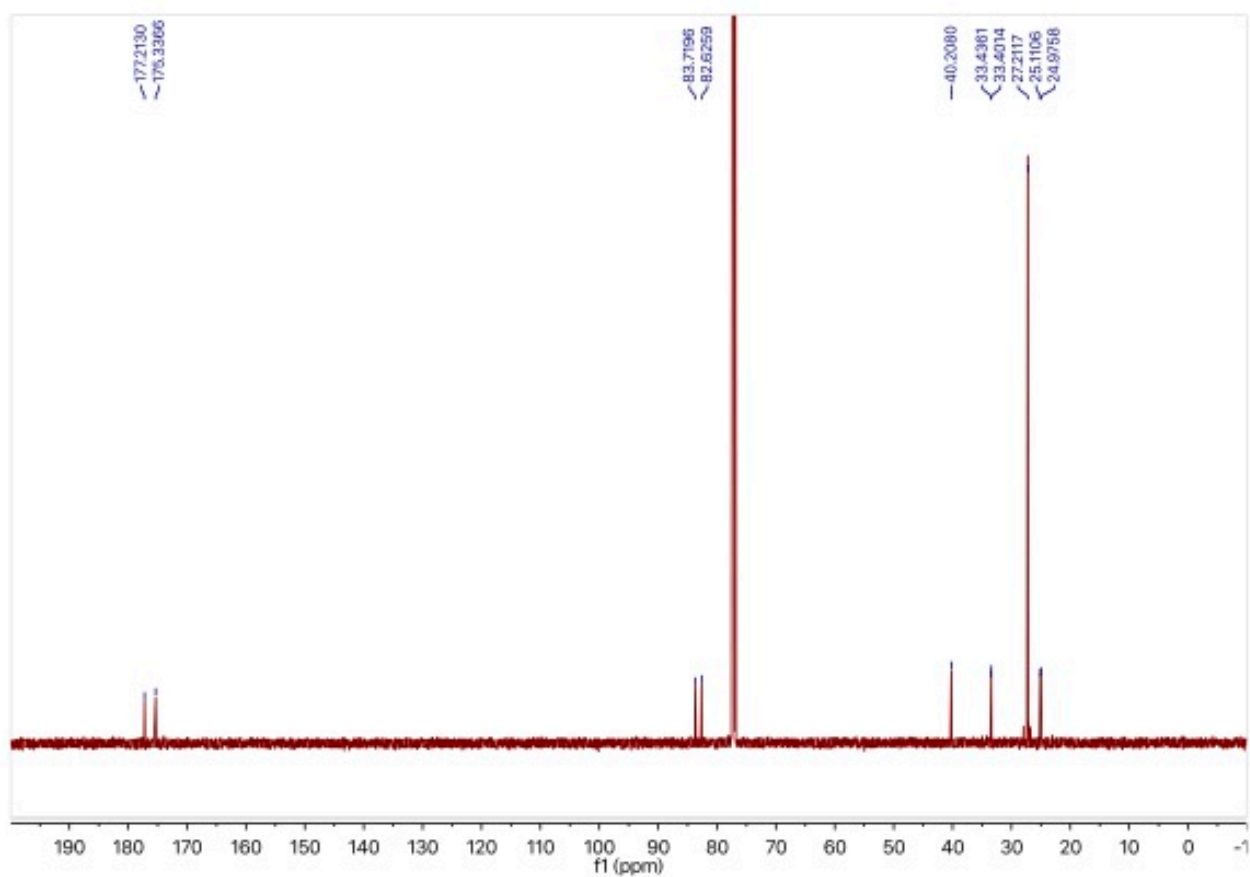

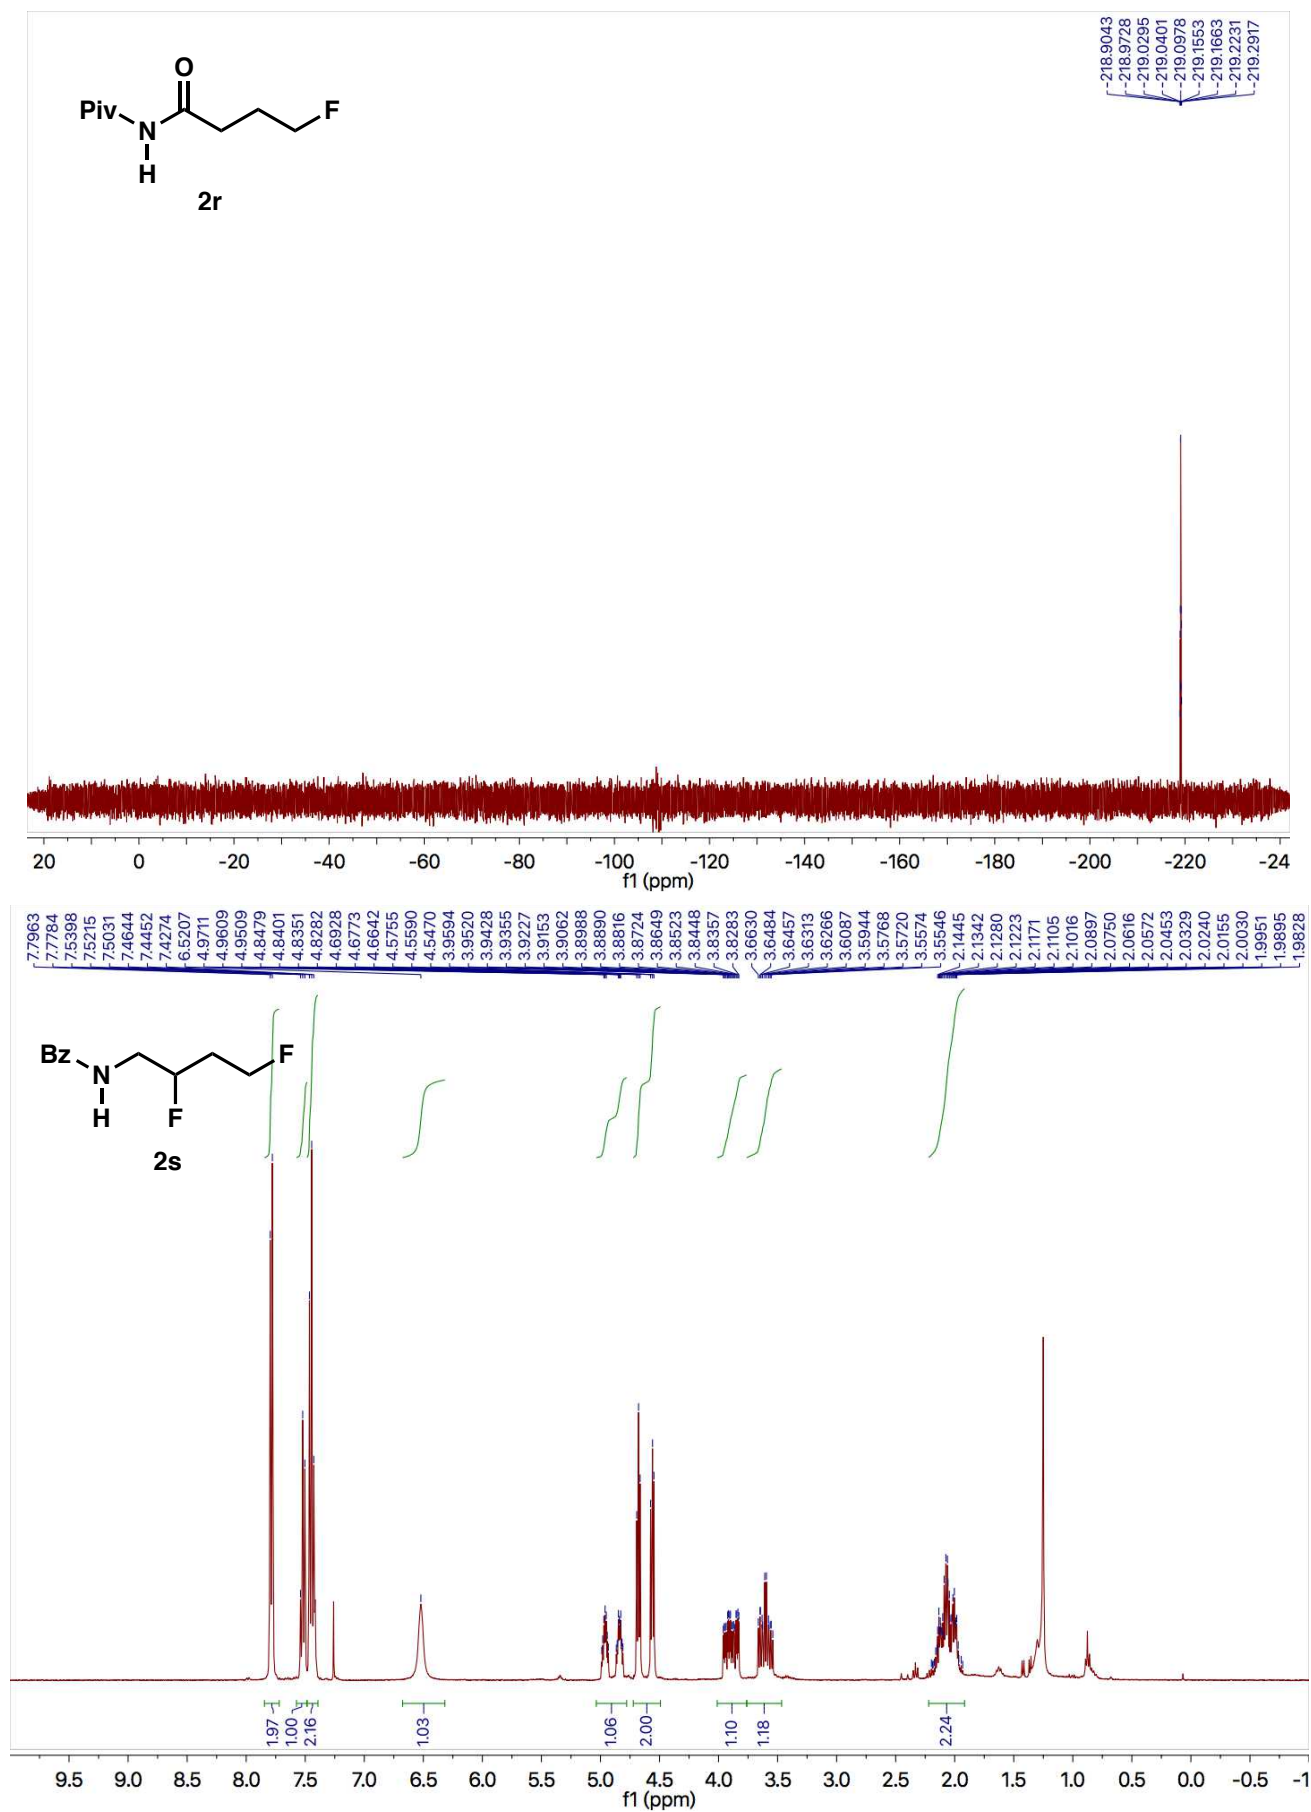

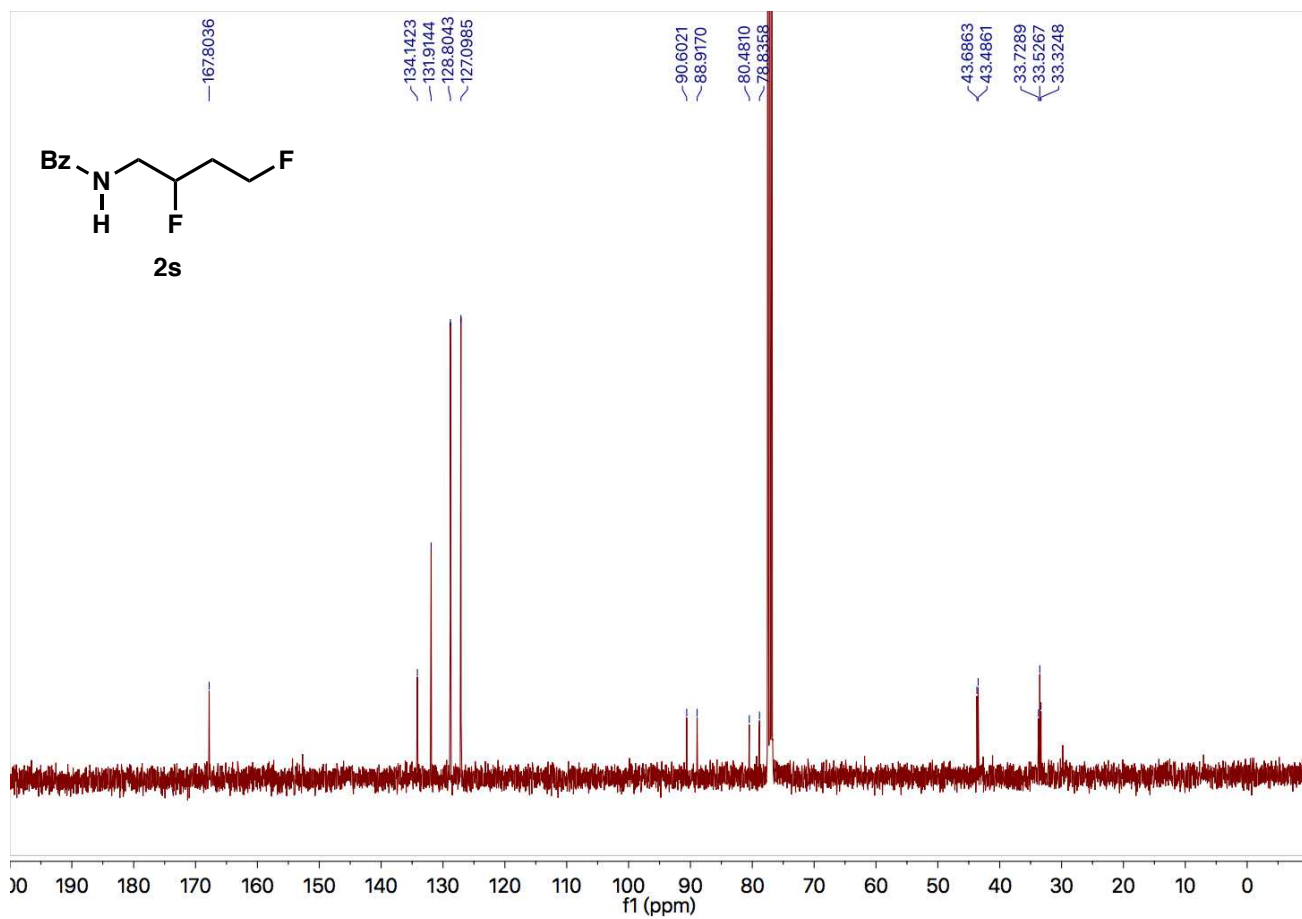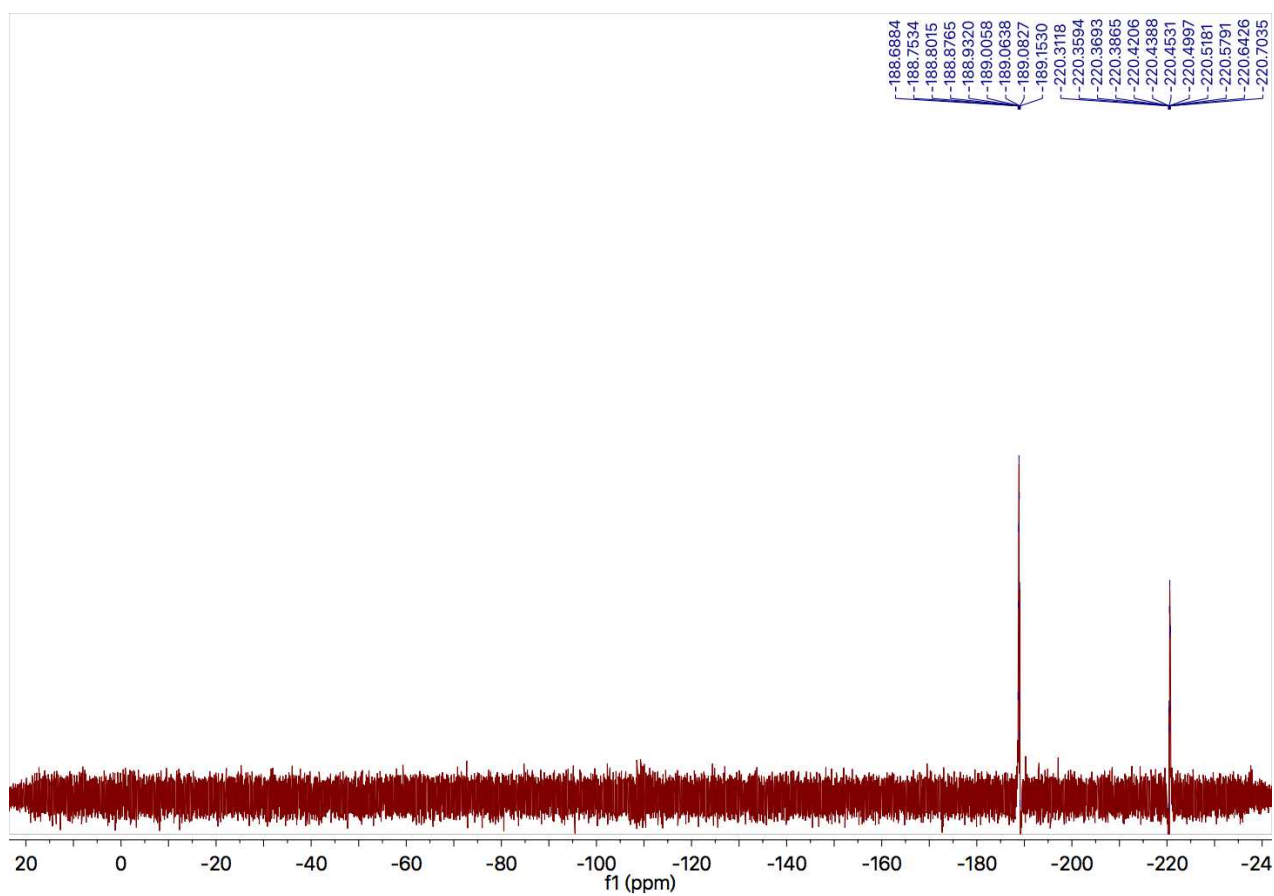

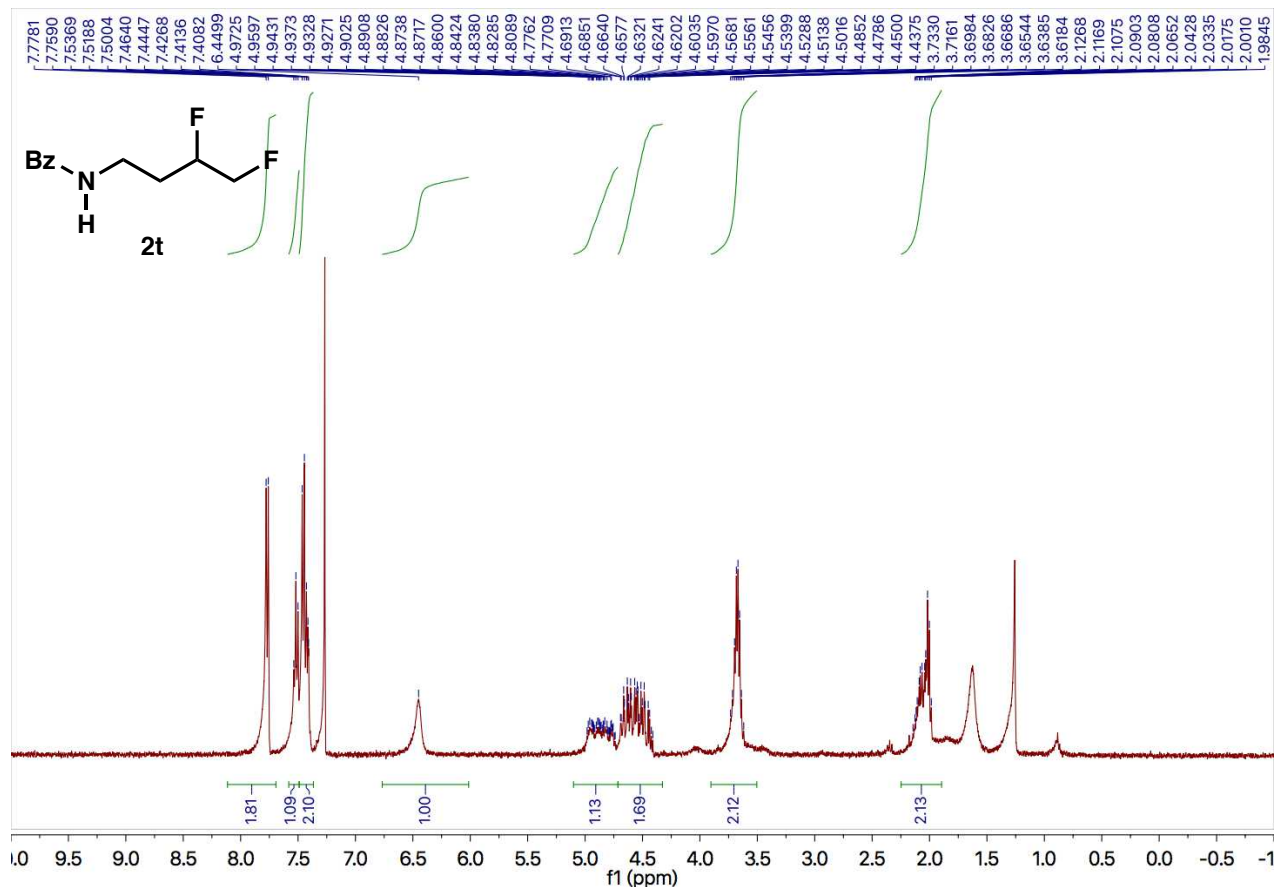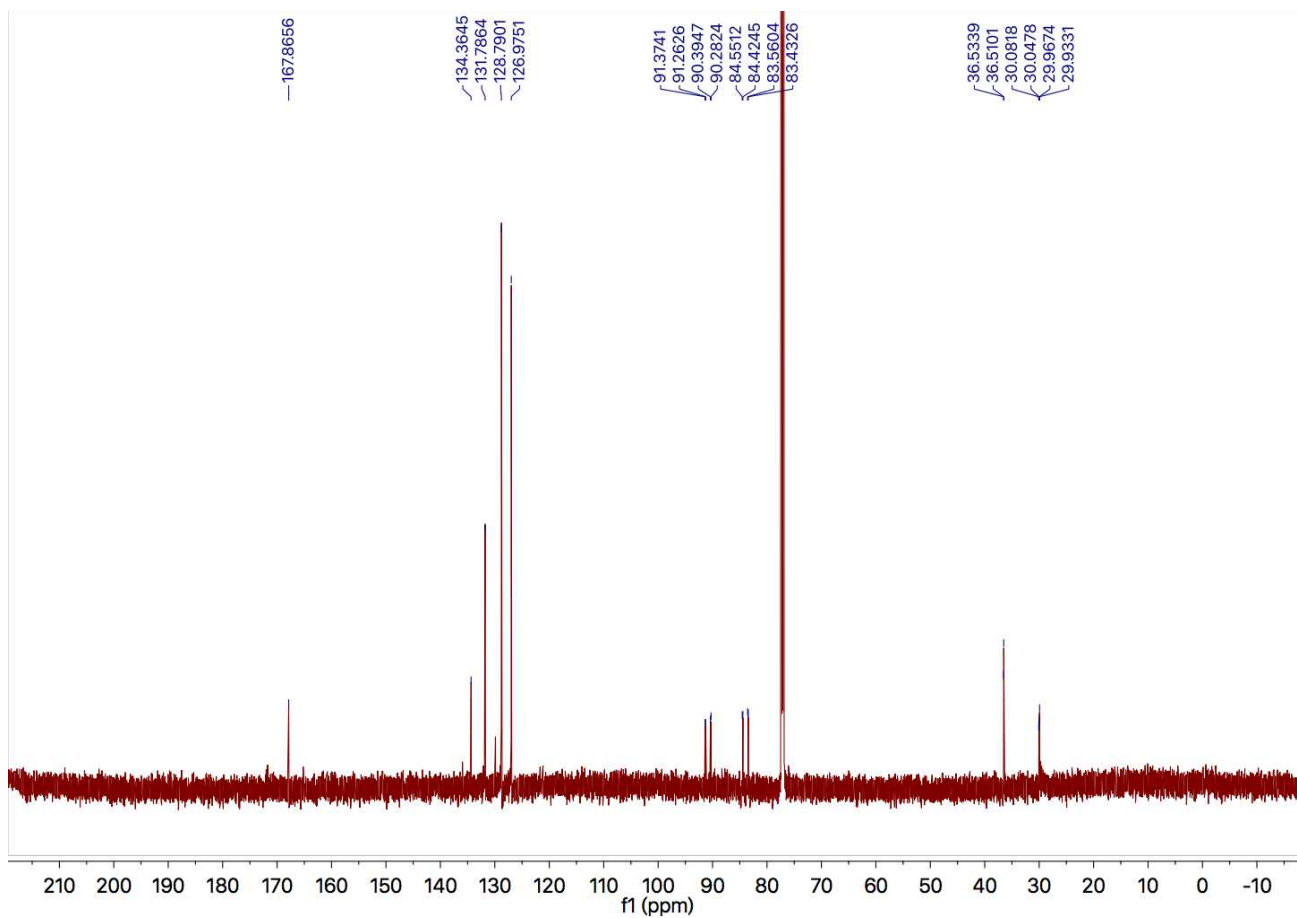

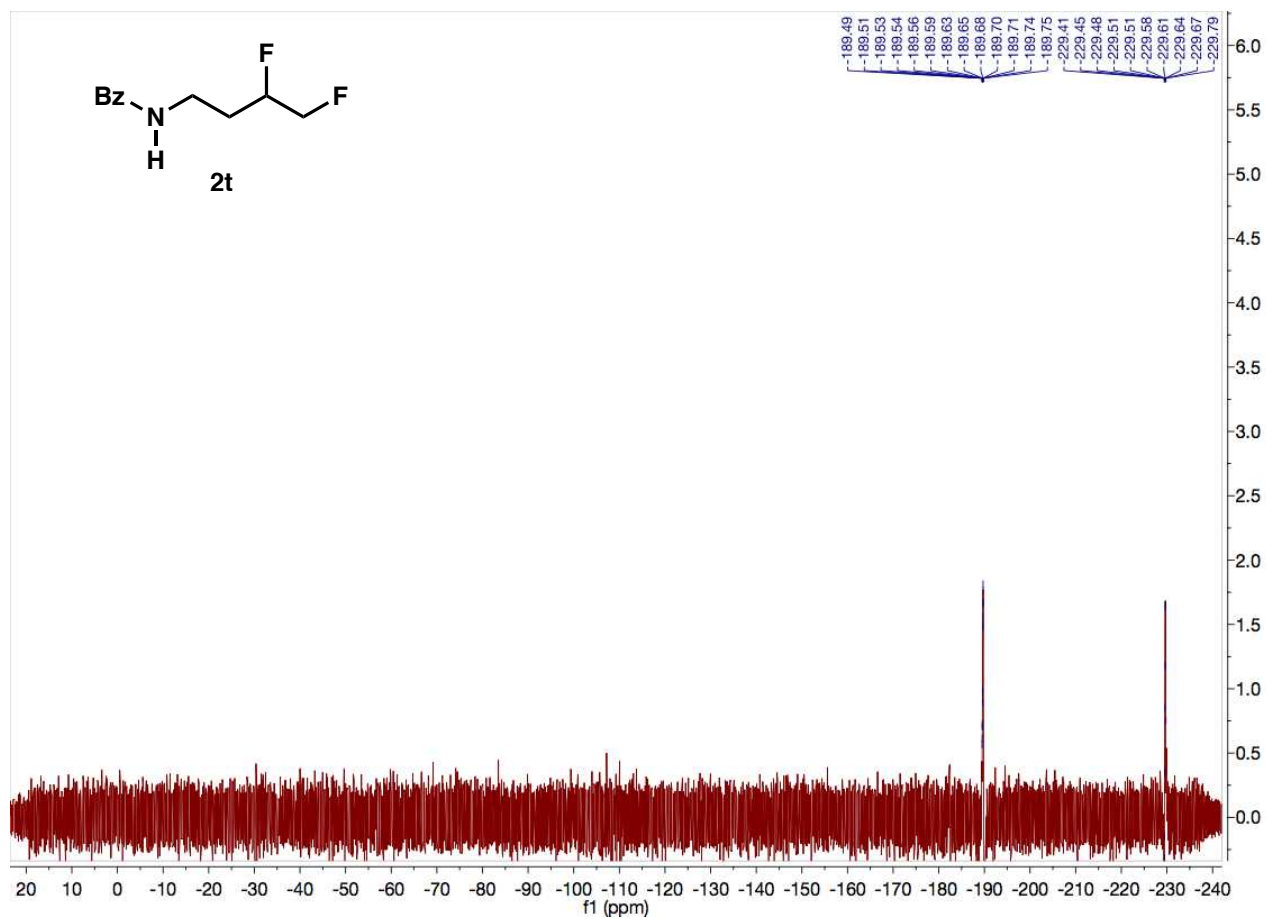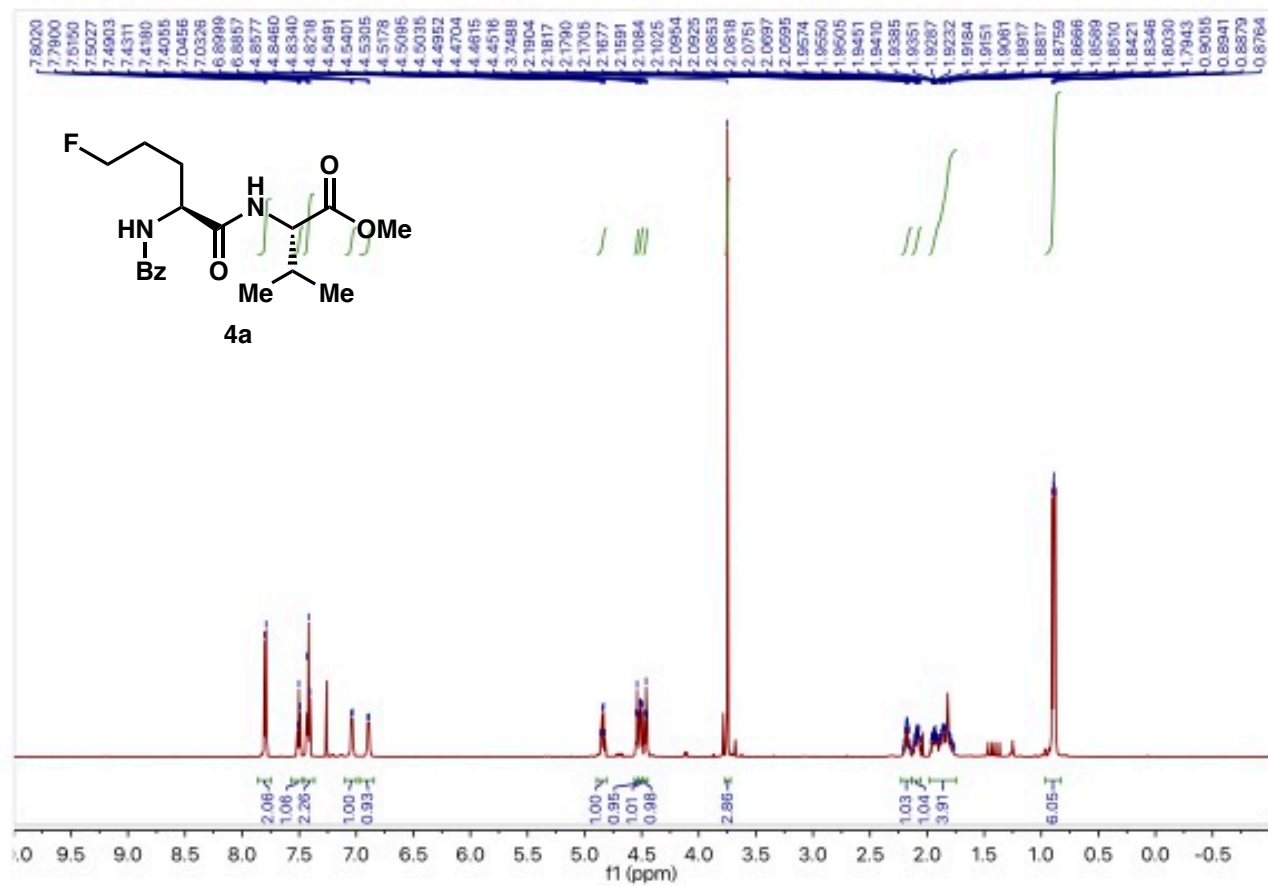



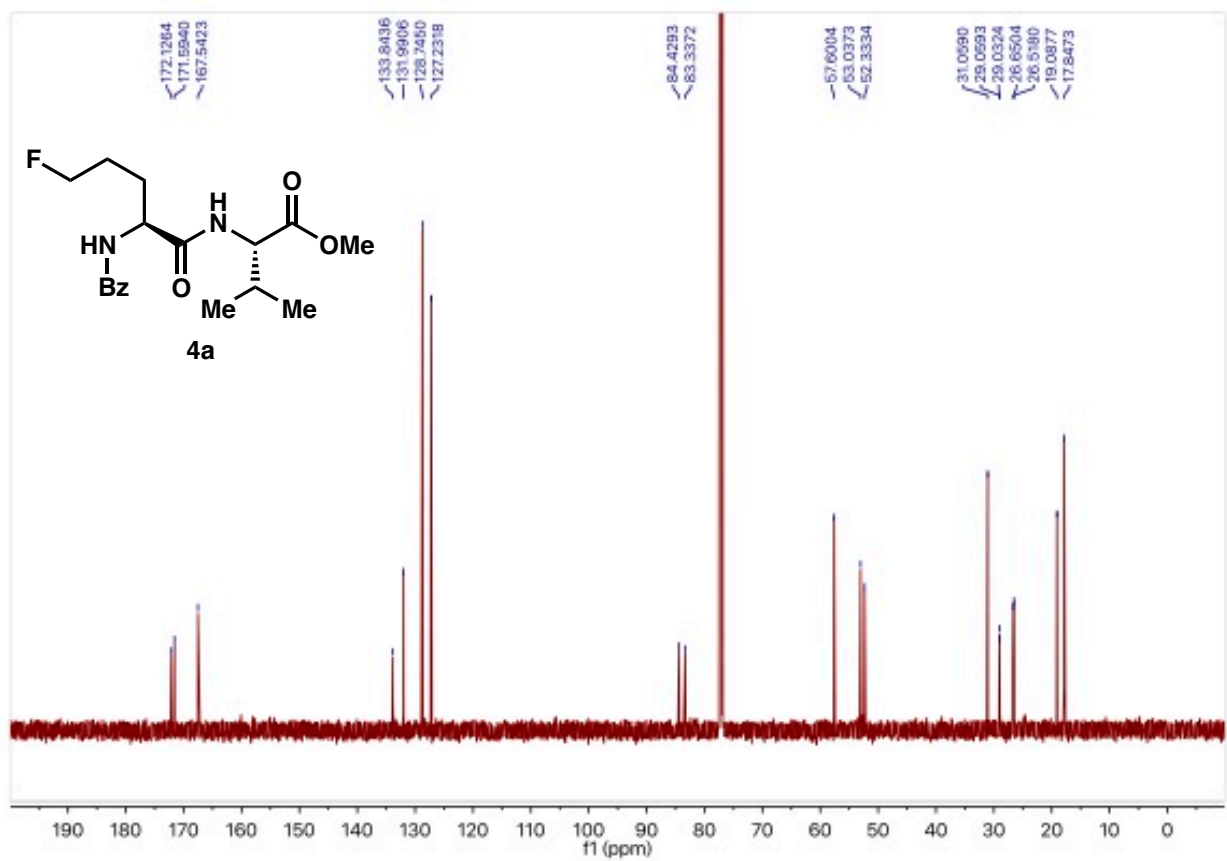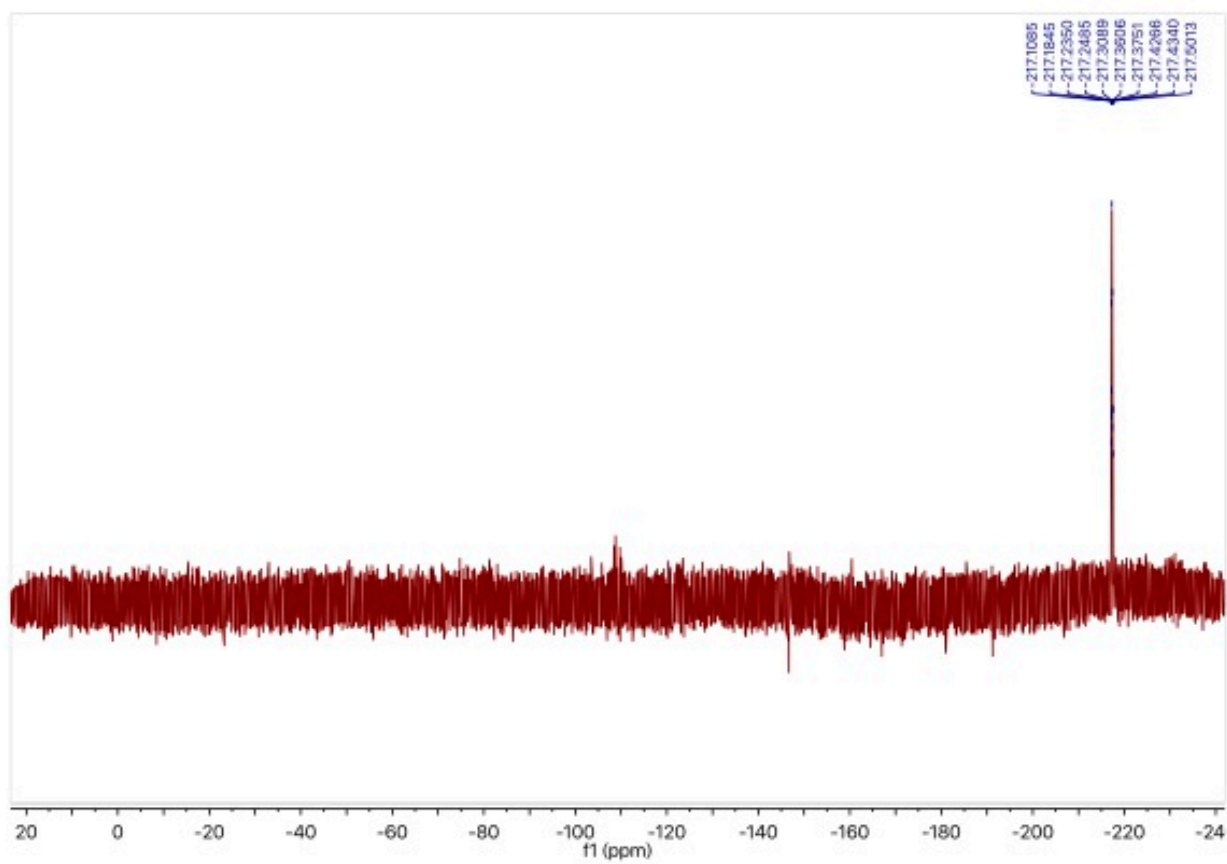



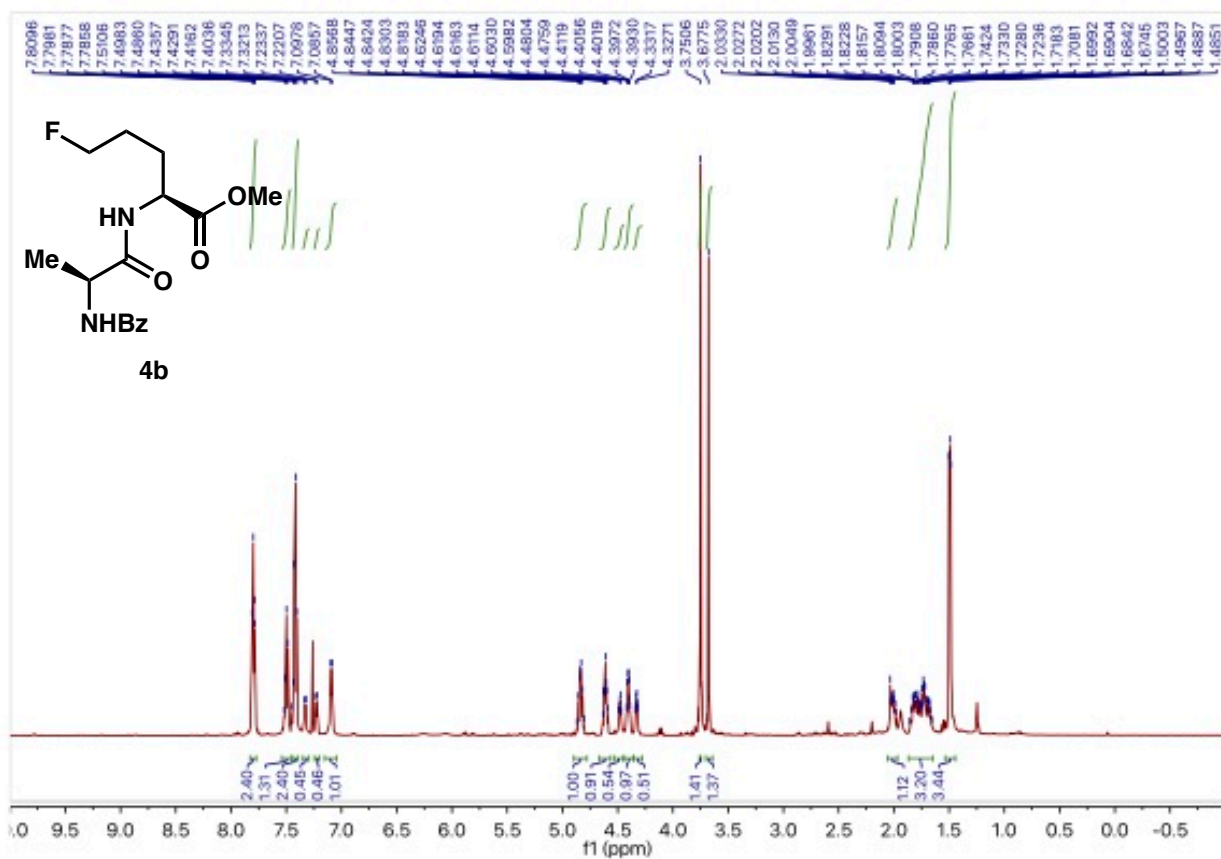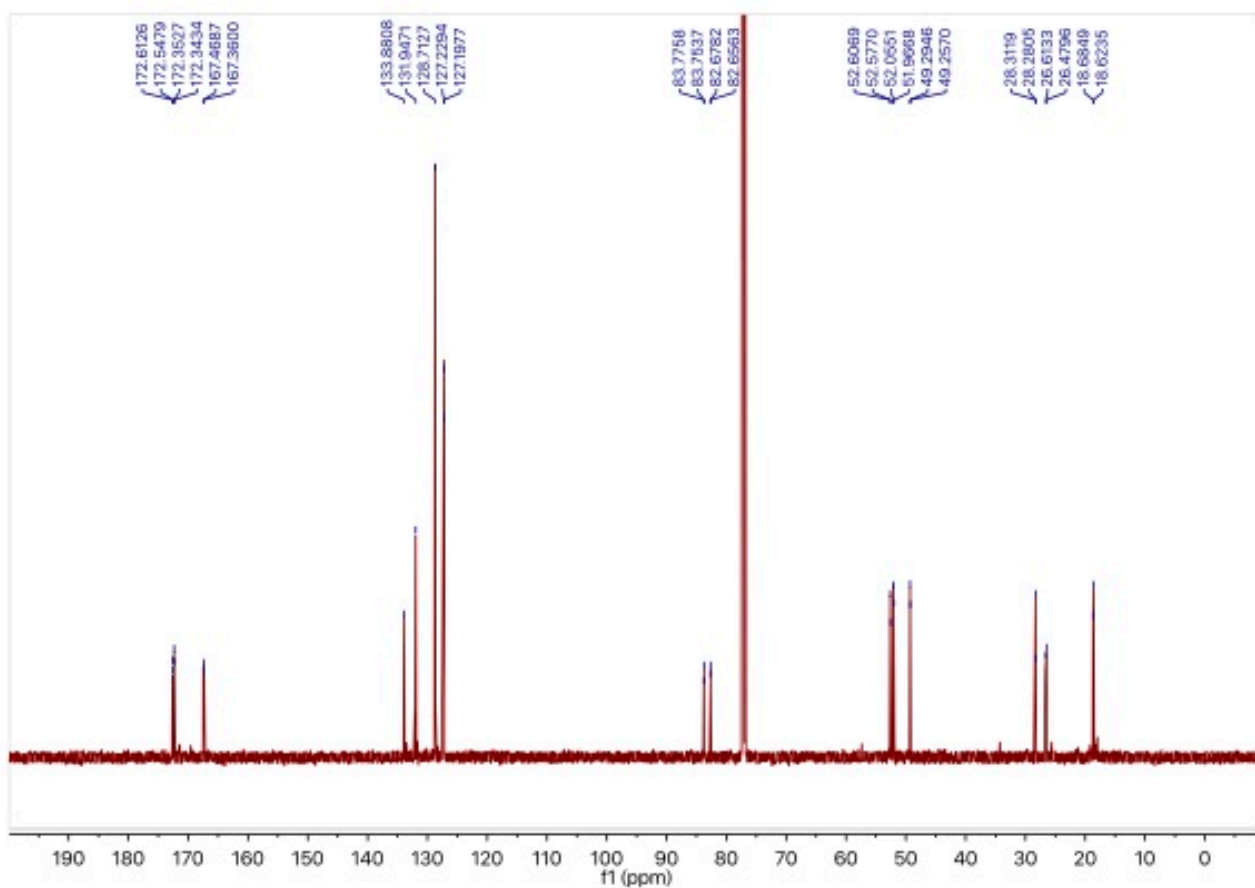



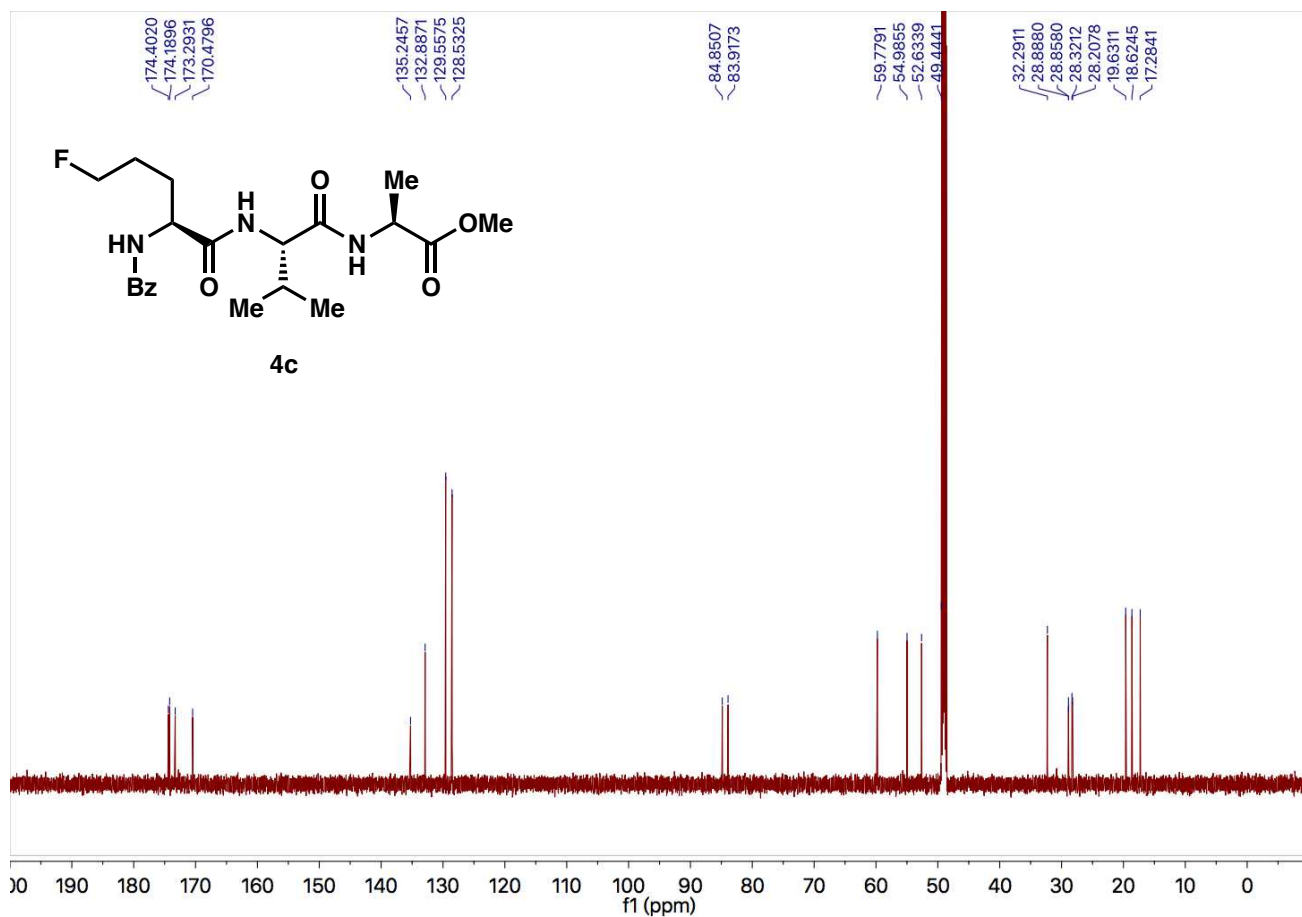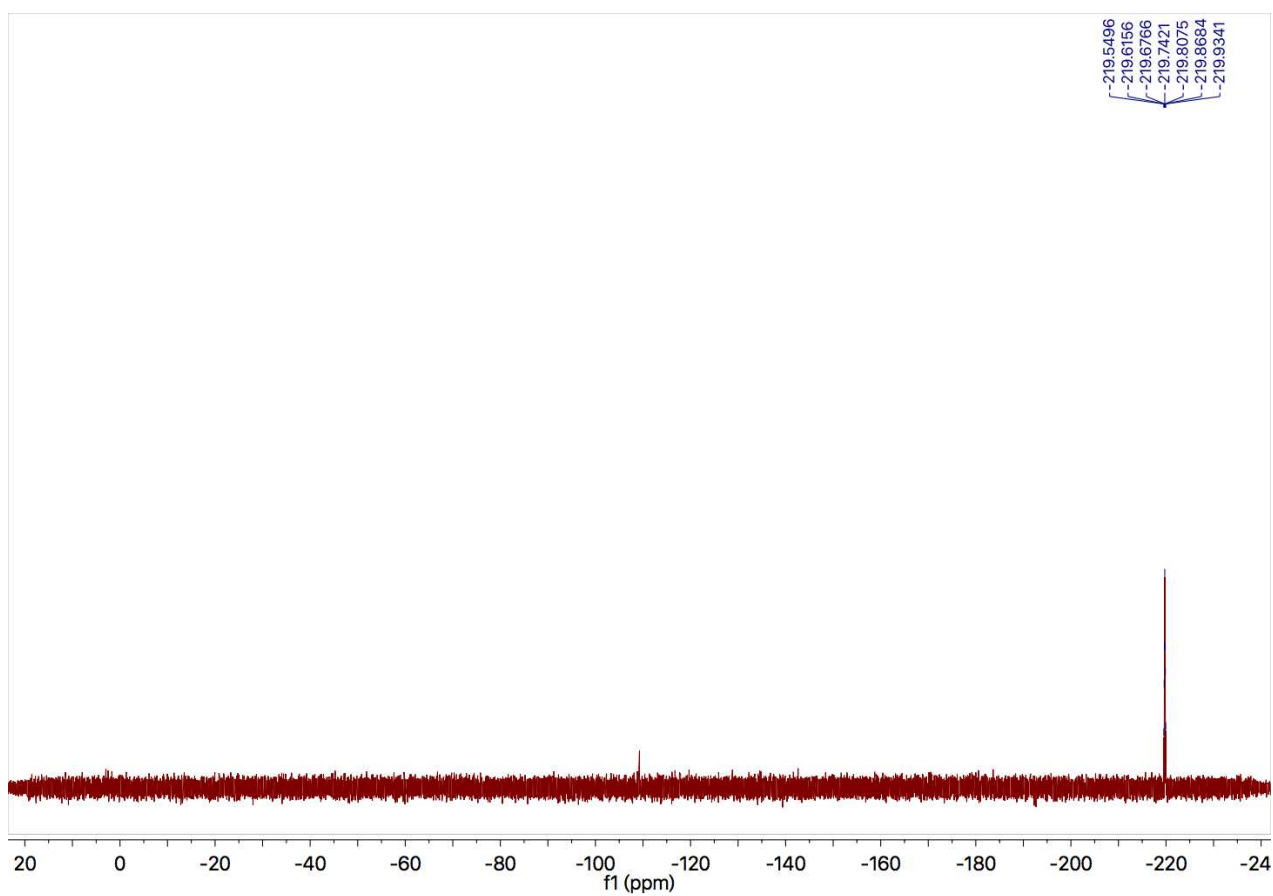

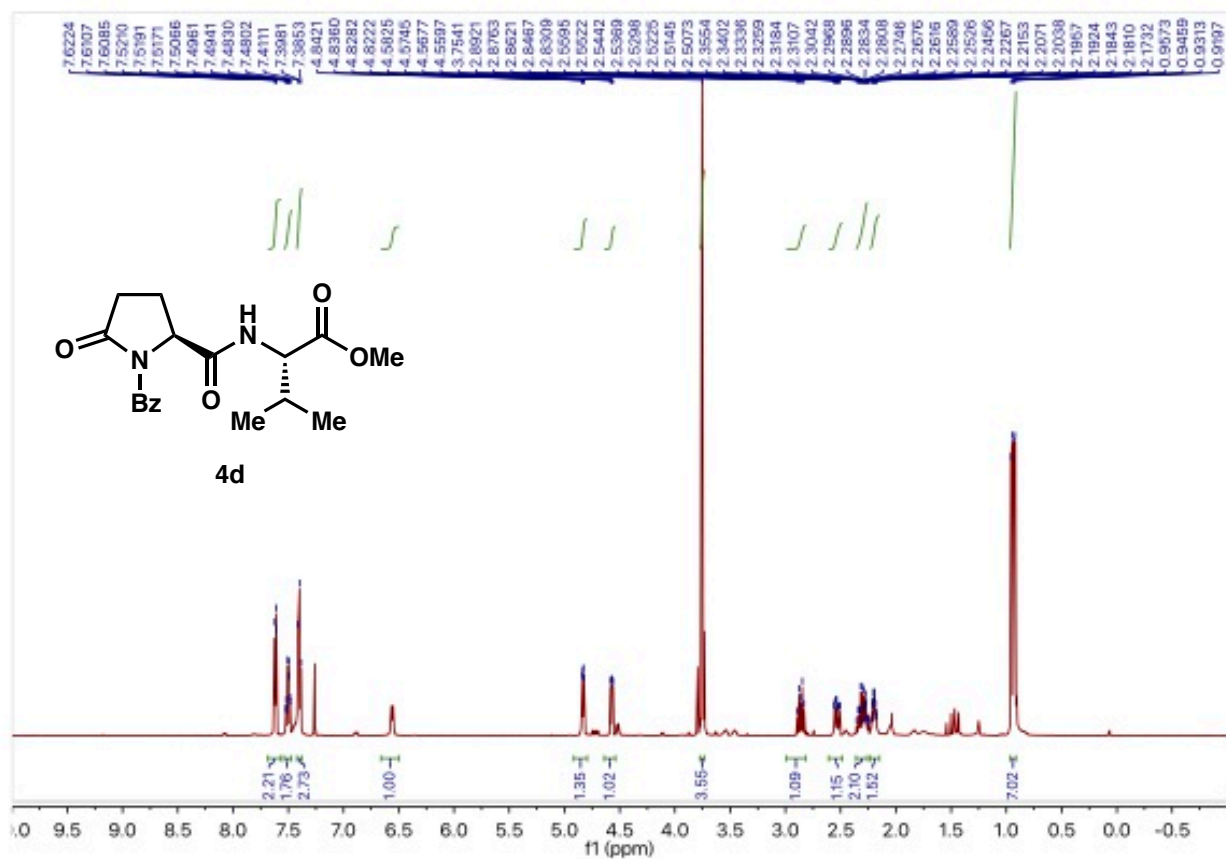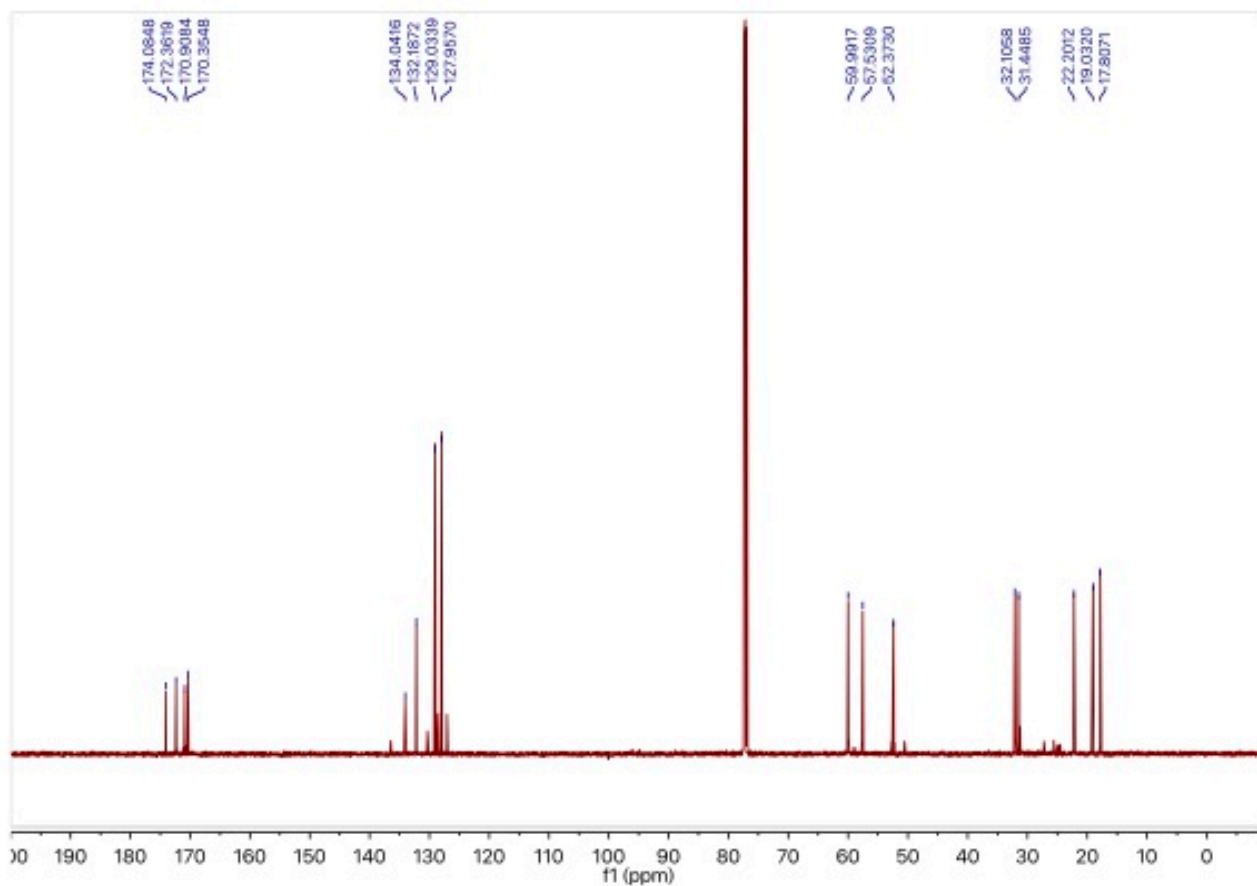

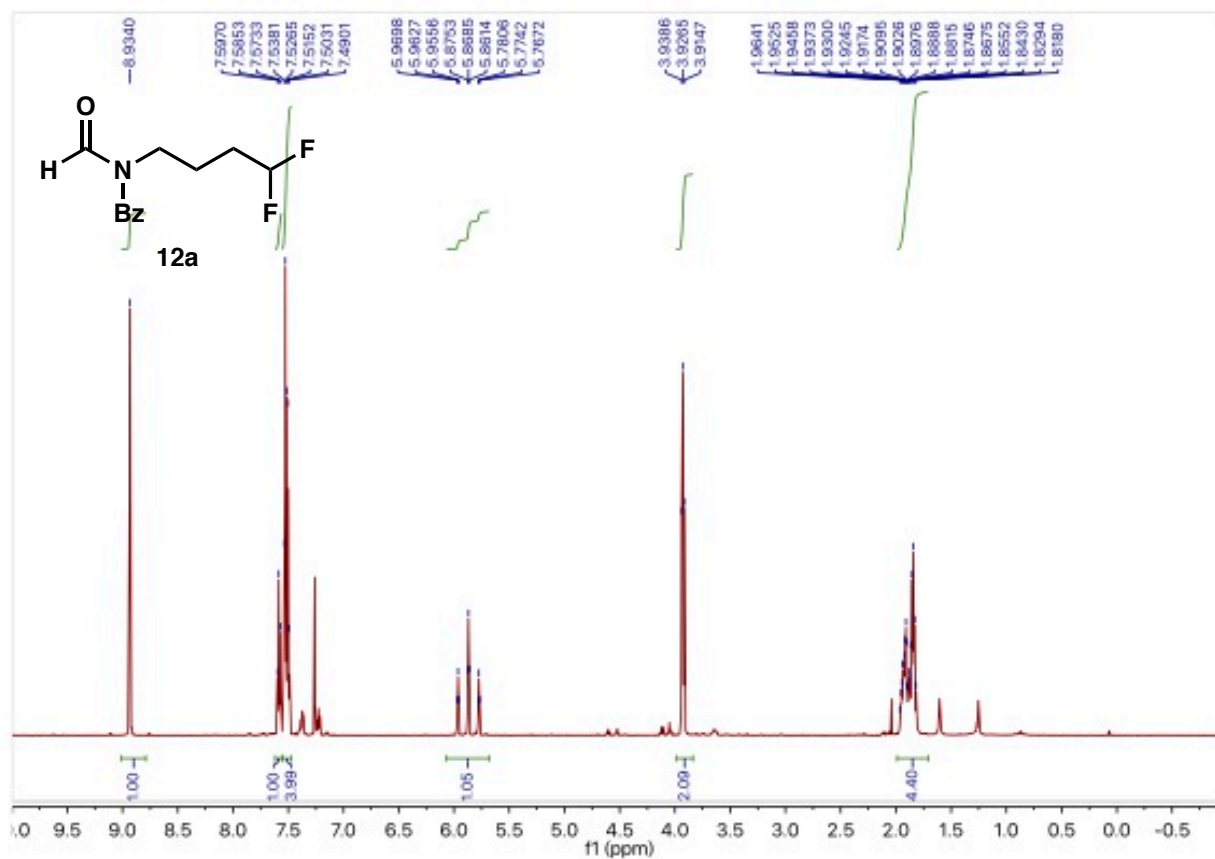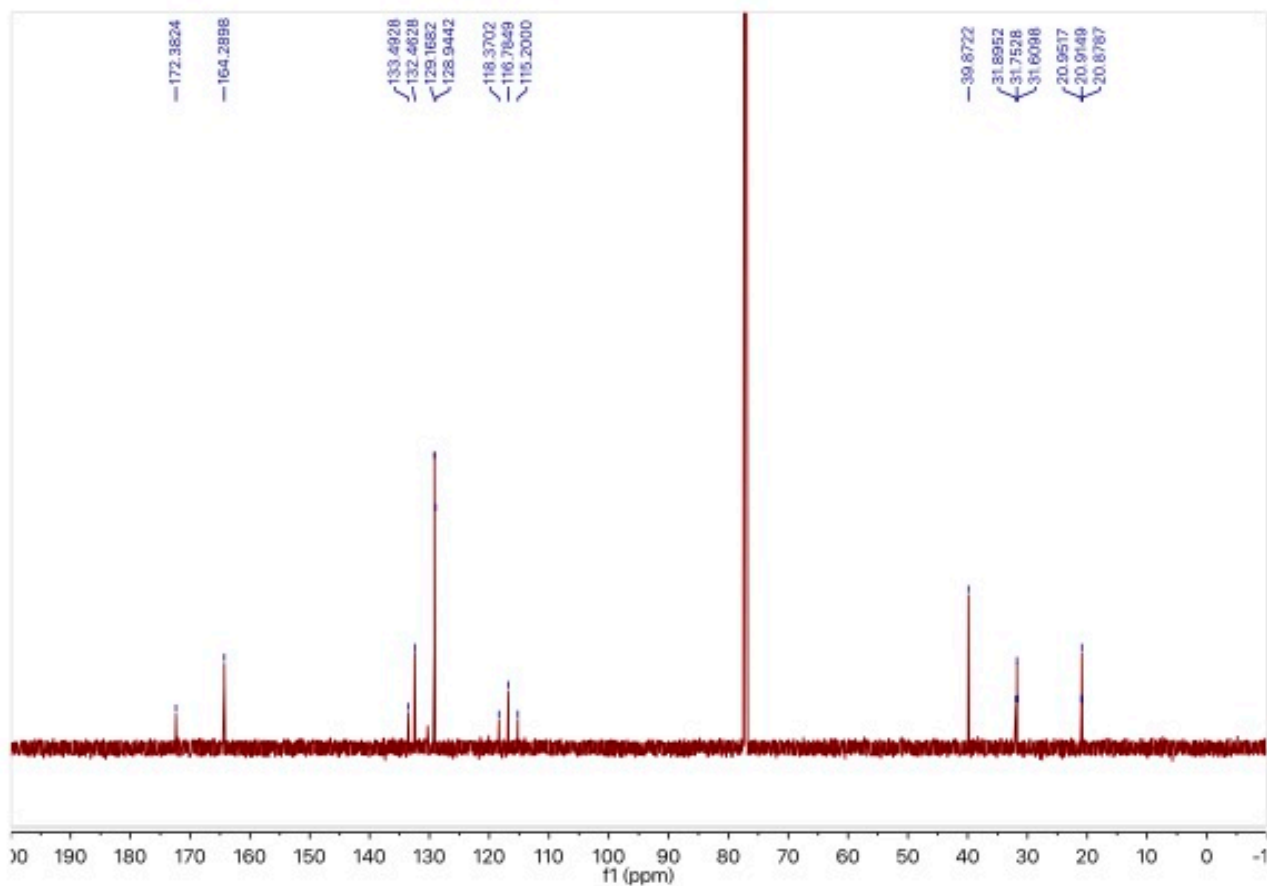

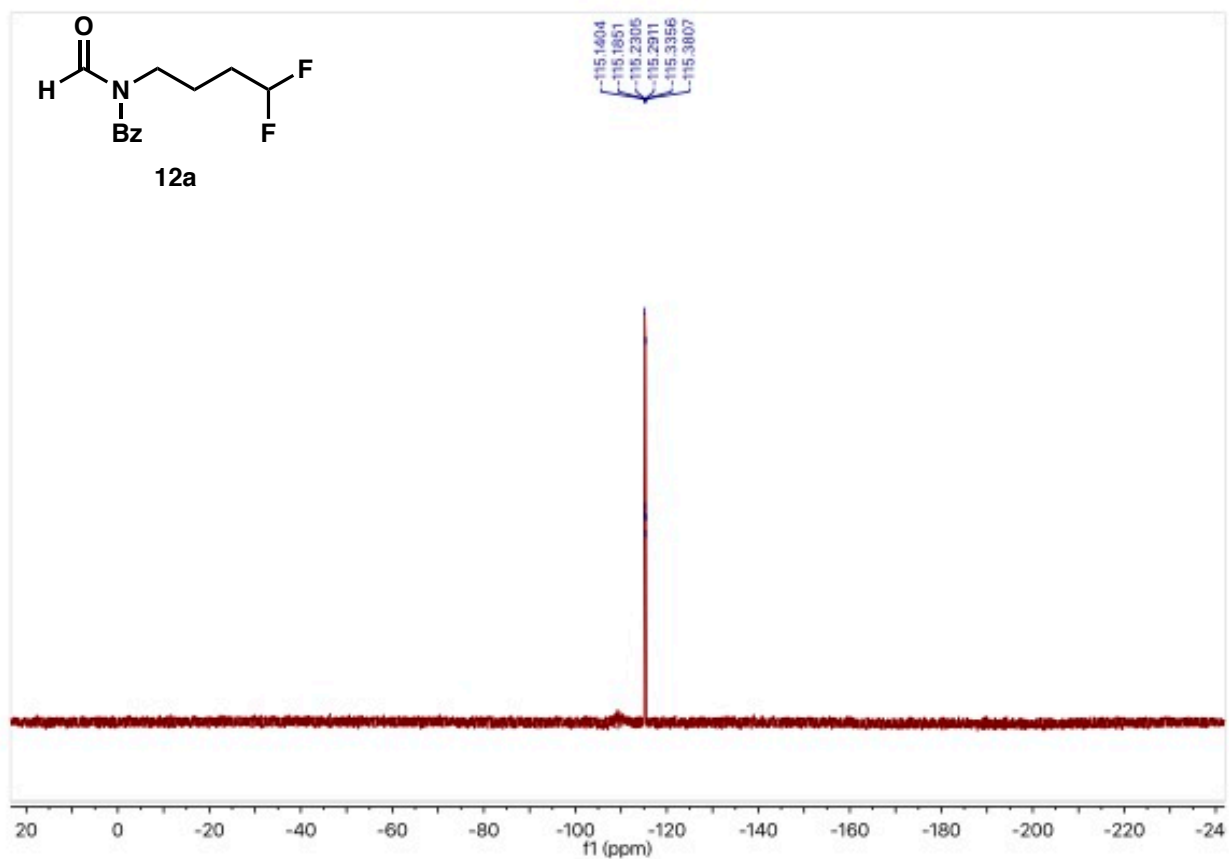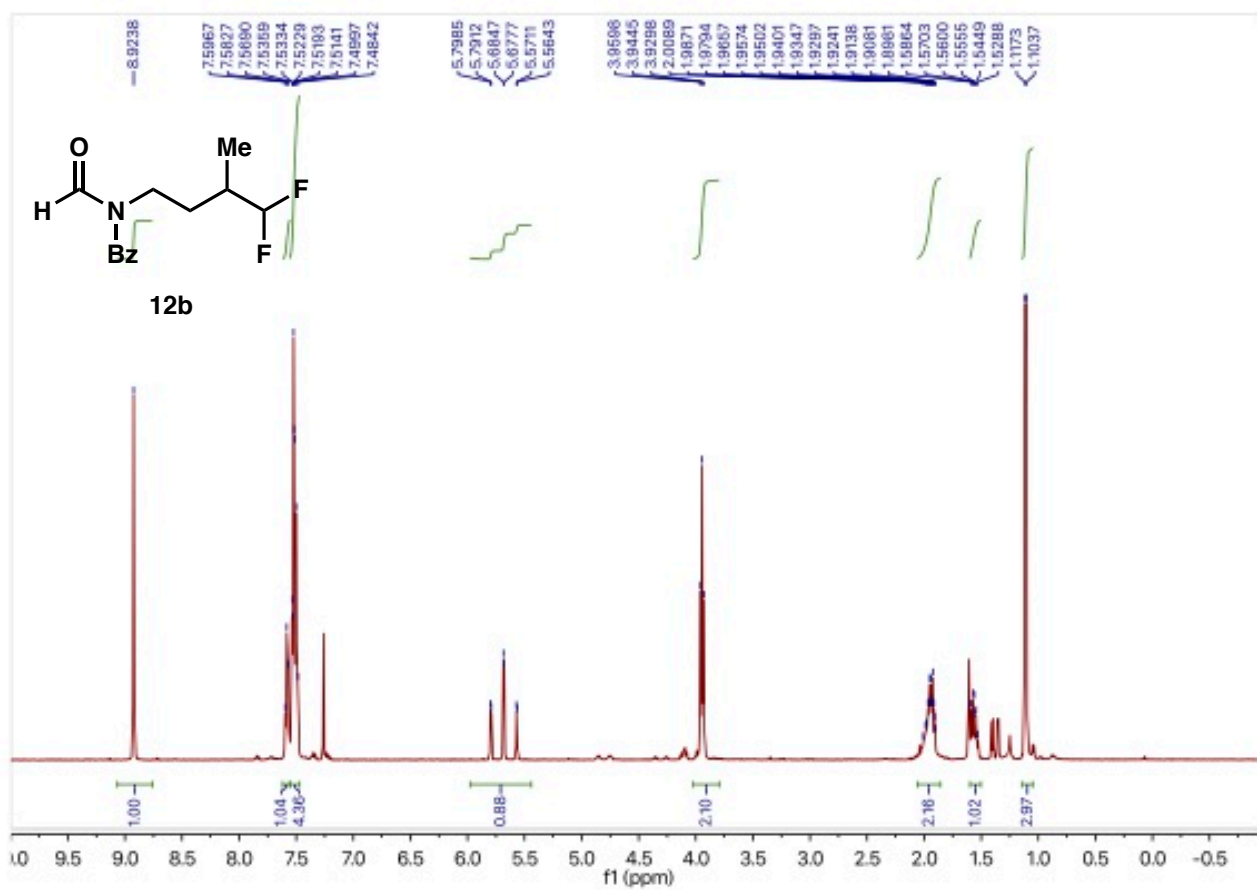

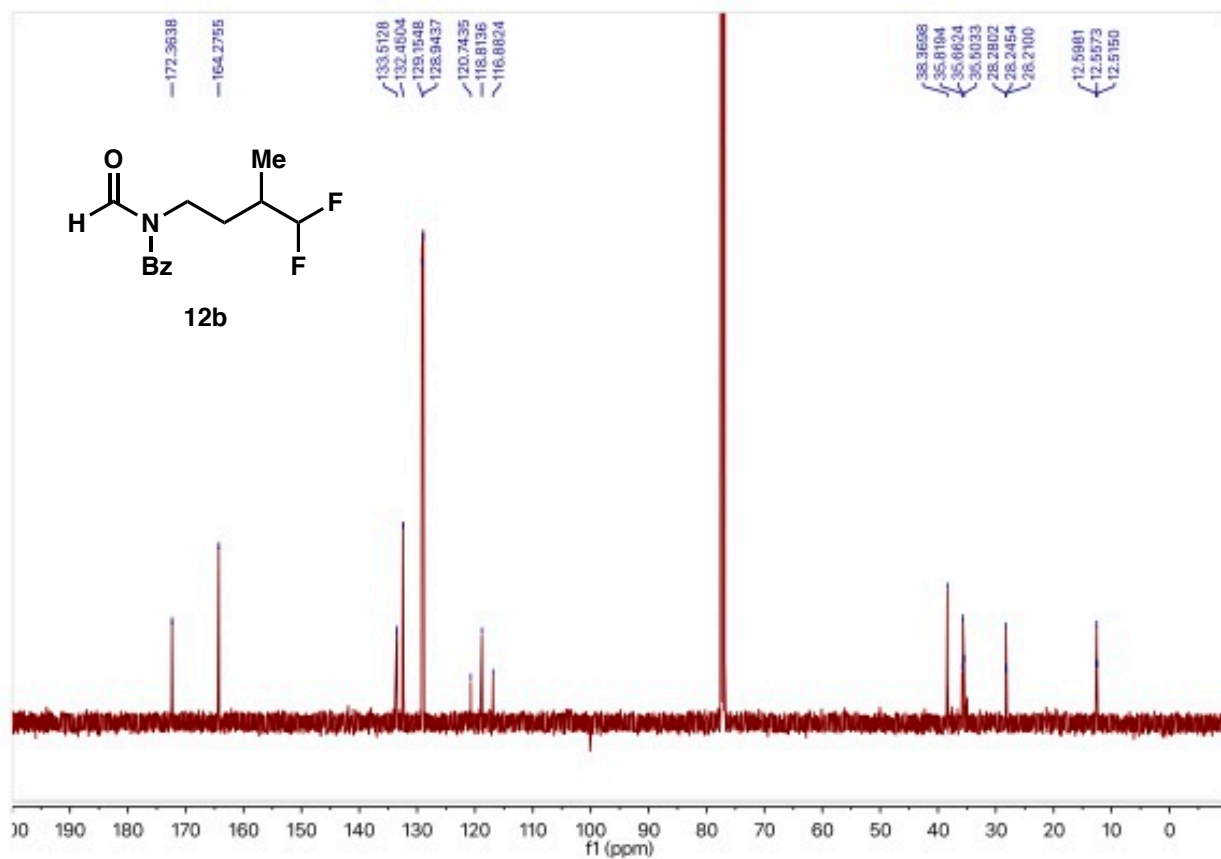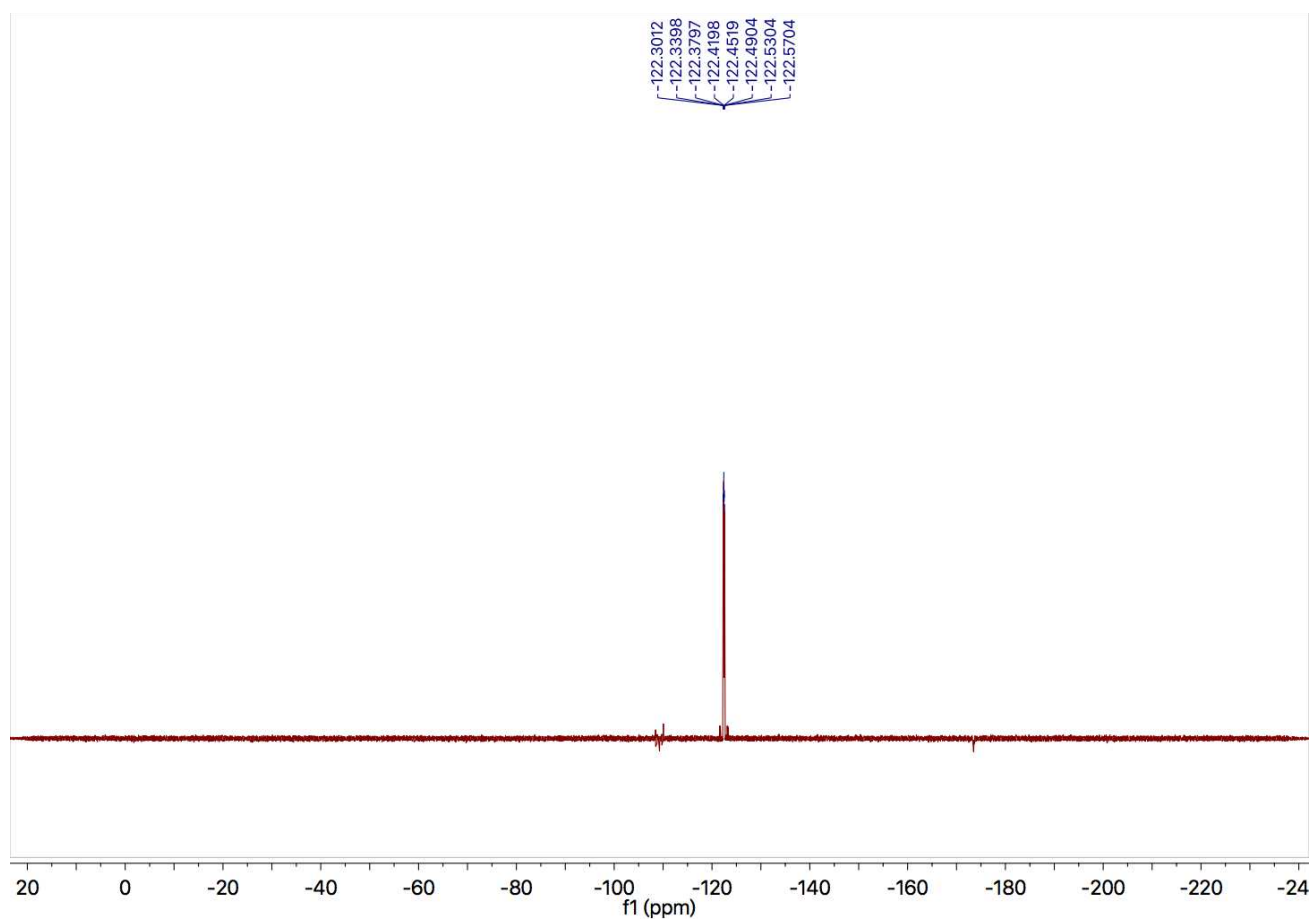



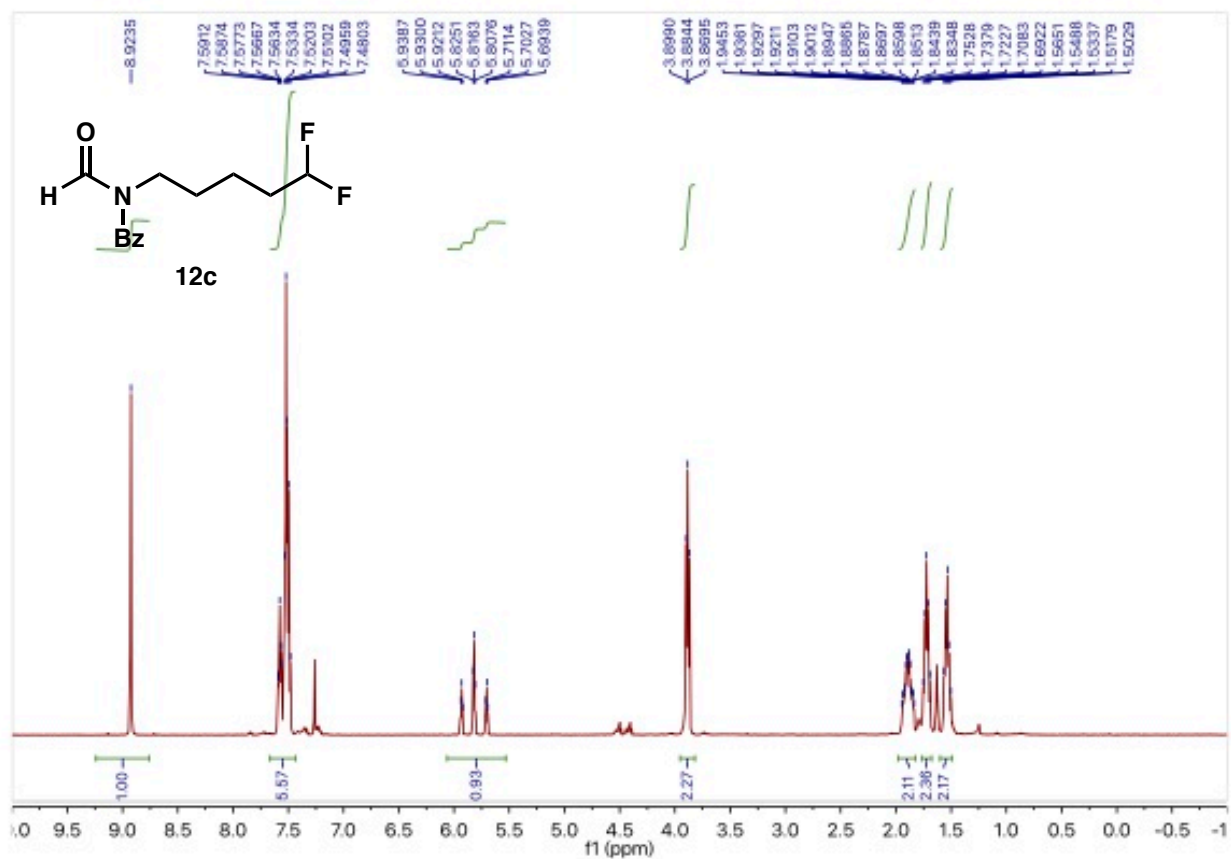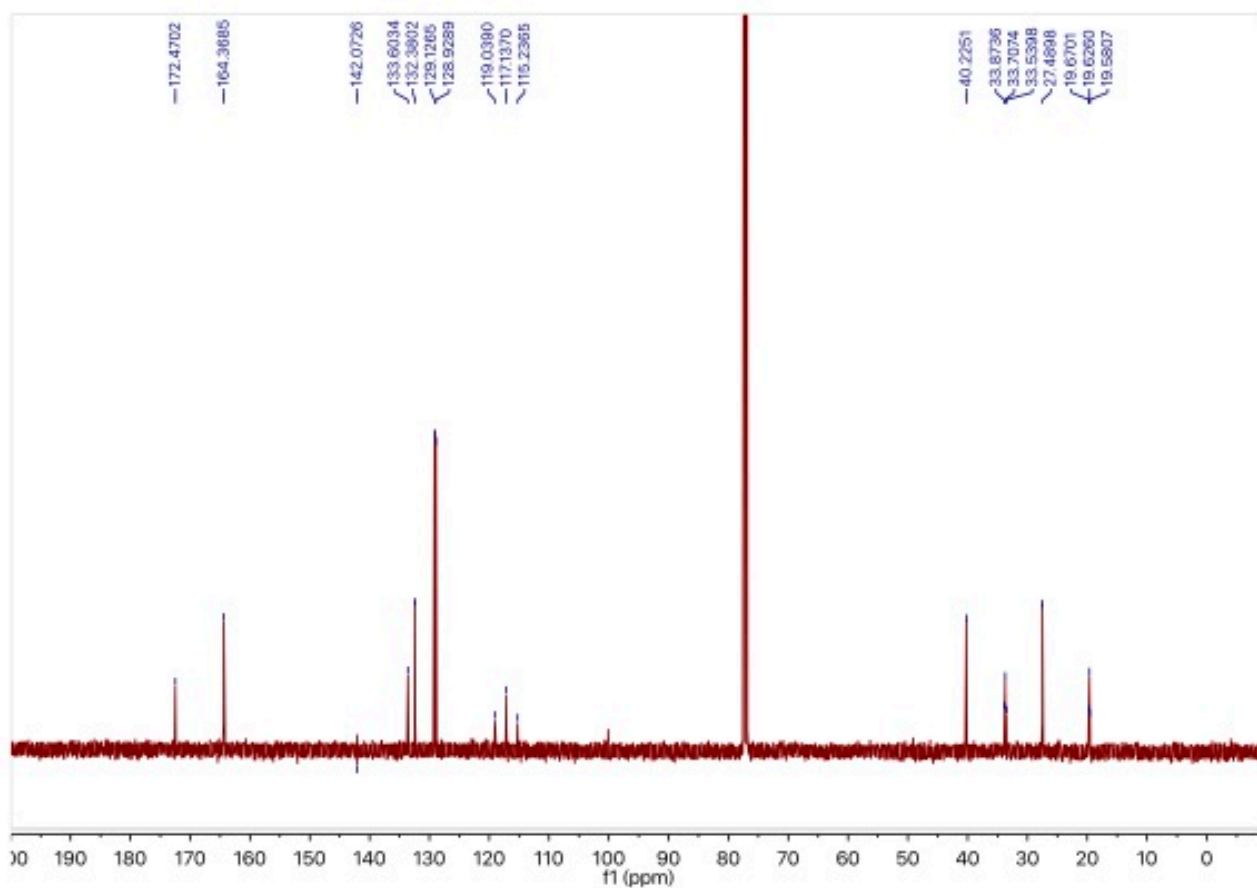



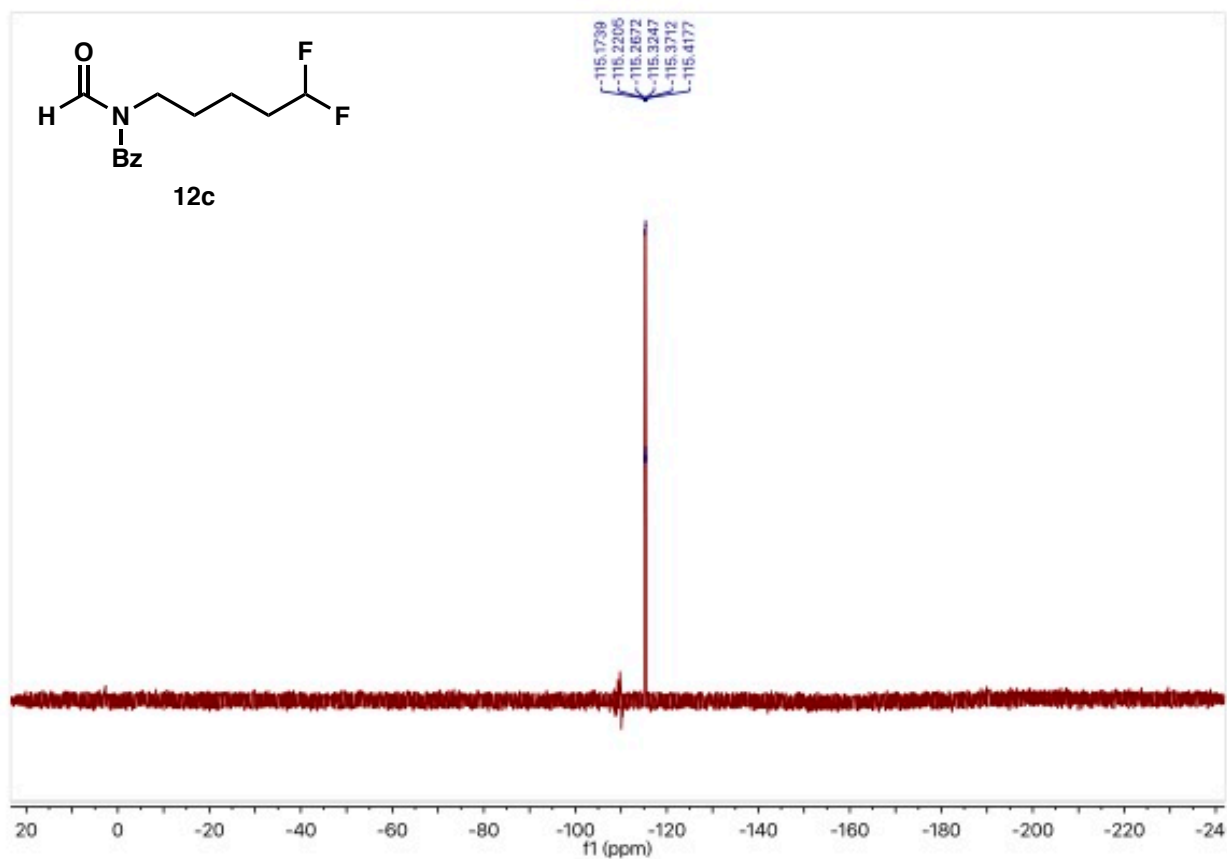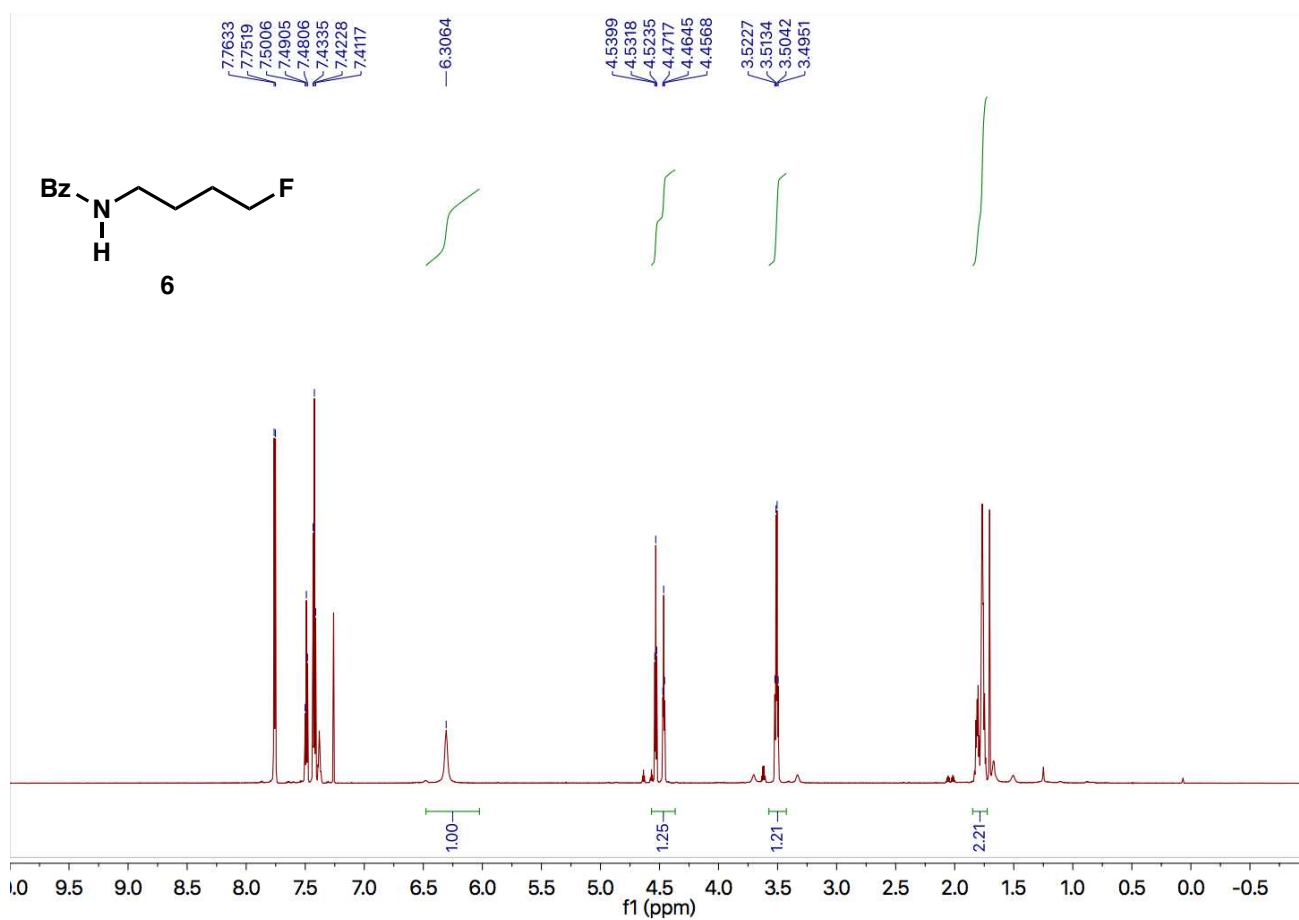

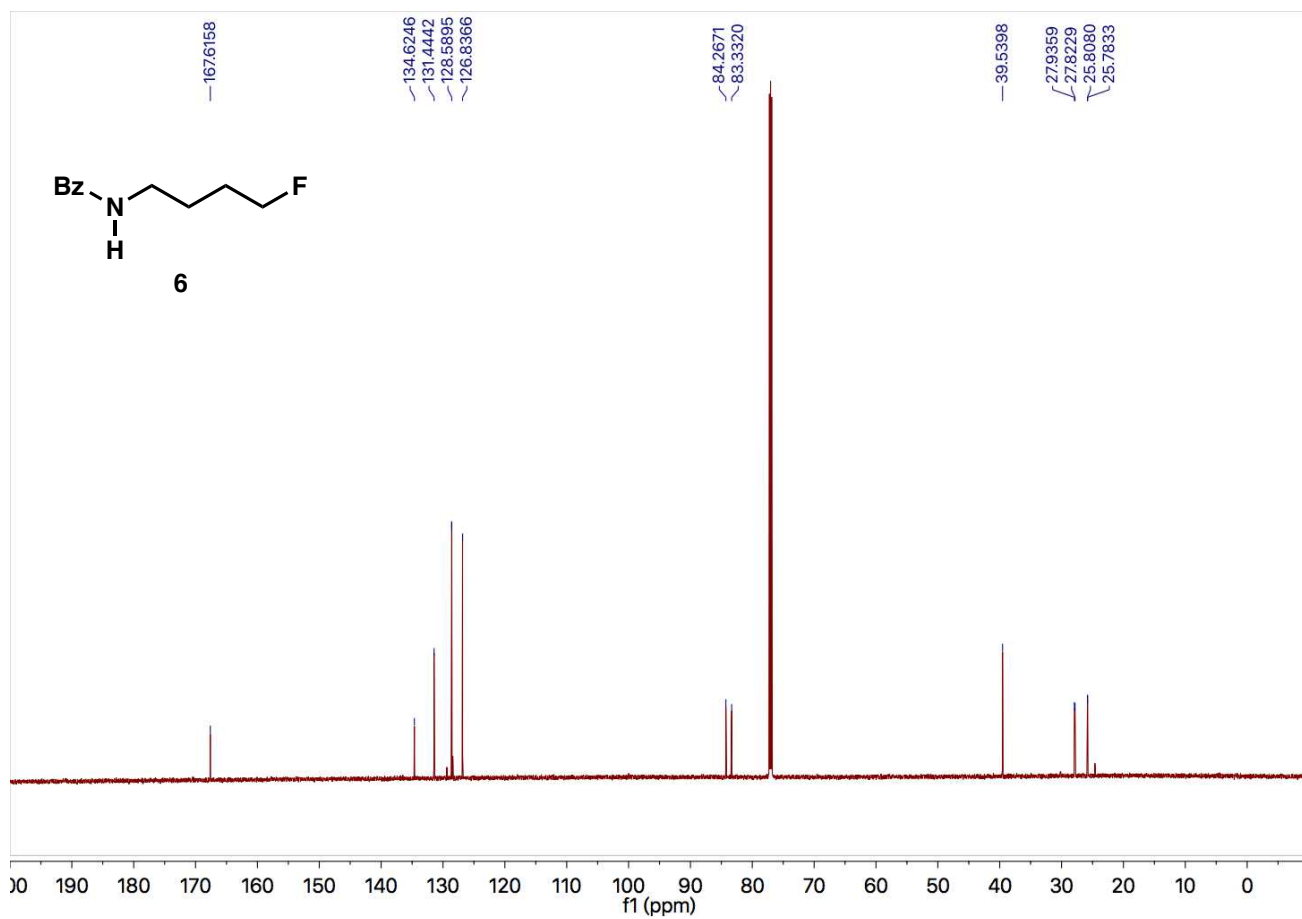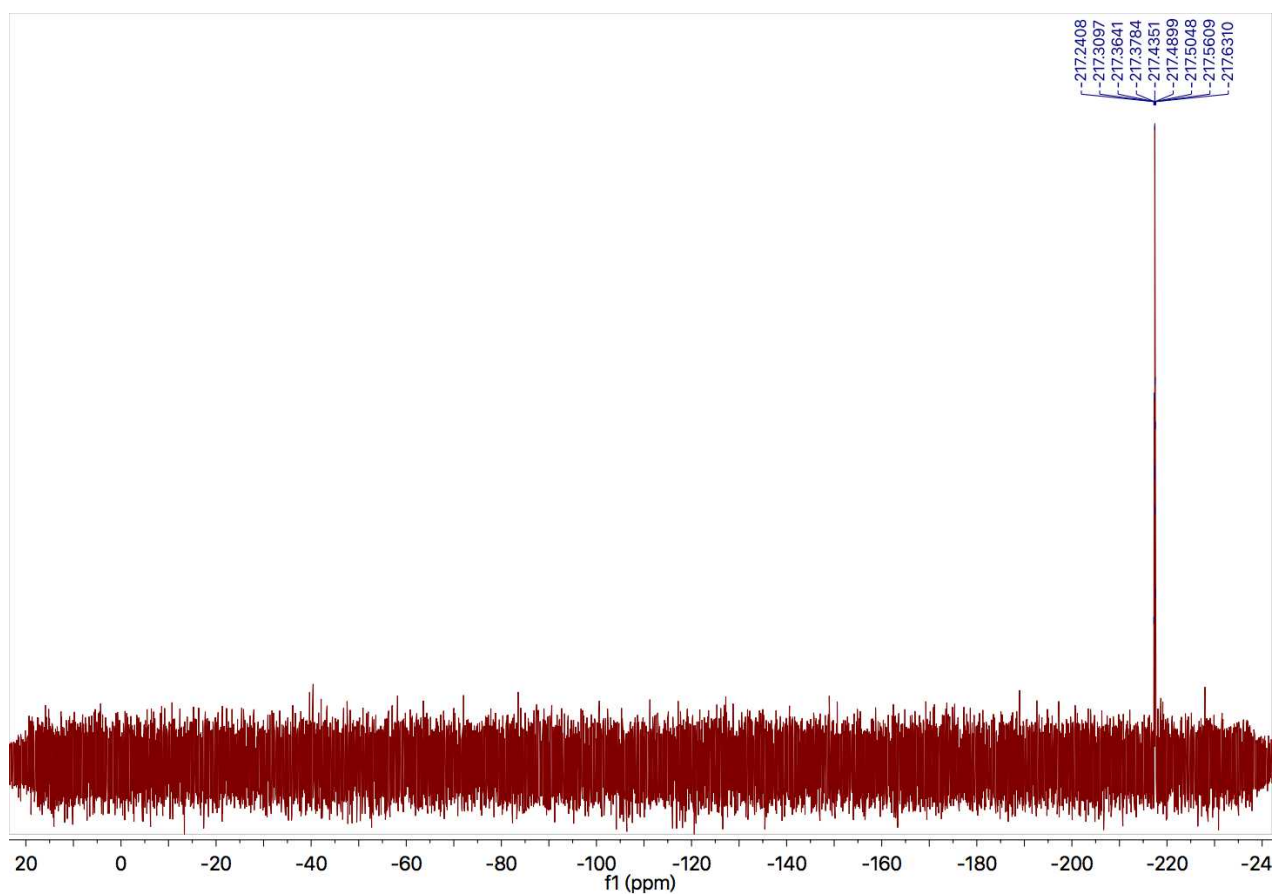

## References and Notes

1. A. H. Hoveyda, A. R. Zhugralin, The remarkable metal-catalysed olefin metathesis reaction. *Nature* **450**, 243–251 (2007). [doi:10.1038/nature06351](https://doi.org/10.1038/nature06351) [Medline](#)
2. G. C. Vougioukalakis, R. H. Grubbs, Ruthenium-based heterocyclic carbene-coordinated olefin metathesis catalysts. *Chem. Rev.* **110**, 1746–1787 (2010). [doi:10.1021/cr9002424](https://doi.org/10.1021/cr9002424) [Medline](#)
3. P. S. Bailey, The Reactions Of Ozone With Organic Compounds. *Chem. Rev.* **58**, 925–1010 (1958). [doi:10.1021/cr50023a005](https://doi.org/10.1021/cr50023a005)
4. S. K. Silverman, P. J. Hergenrother, Combinatorial chemistry and molecular diversity Tools for molecular diversification and their applications in chemical biology. *Curr. Opin. Chem. Biol.* **10**, 185–187 (2006). [doi:10.1016/j.cbpa.2006.04.024](https://doi.org/10.1016/j.cbpa.2006.04.024)
5. E. Vitaku, D. T. Smith, J. T. Njardarson, Analysis of the structural diversity, substitution patterns, and frequency of nitrogen heterocycles among U.S. FDA approved pharmaceuticals. *J. Med. Chem.* **57**, 10257–10274 (2014). [doi:10.1021/jm501100b](https://doi.org/10.1021/jm501100b) [Medline](#)
6. S. A. Lawrence, *Amines: Synthesis, Properties and Applications* (Cambridge Univ. Press, 2004).
7. A. P. Shawcross, S. P. Stanforth, Reaction of *N*-nitroaryl-1,2,3,4-tetrahydroisoquinoline derivatives with oxygen. *J. Heterocycl. Chem.* **27**, 367–369 (1990). [doi:10.1002/jhet.5570270249](https://doi.org/10.1002/jhet.5570270249)
8. G. Han, M. C. McIntosh, S. M. Weinreb, A convenient synthetic method for amide oxidation. *Tetrahedron Lett.* **35**, 5813–5816 (1994). [doi:10.1016/S0040-4039\(00\)78191-3](https://doi.org/10.1016/S0040-4039(00)78191-3)
9. G. Cocquet, C. Ferroud, A. Guy, A Mild and Efficient Procedure for Ring-Opening Reactions of Piperidine and Pyrrolidine Derivatives by Single Electron Transfer Photooxidation. *Tetrahedron* **56**, 2975–2984 (2000). [doi:10.1016/S0040-4020\(00\)00048-X](https://doi.org/10.1016/S0040-4020(00)00048-X)
10. R. Ito, N. Umezawa, T. Higuchi, Unique oxidation reaction of amides with pyridine-*N*-oxide catalyzed by ruthenium porphyrin: Direct oxidative conversion of *N*-acyl-L-proline to *N*-acyl-L-glutamate. *J. Am. Chem. Soc.* **127**, 834–835 (2005). [doi:10.1021/ja045603f](https://doi.org/10.1021/ja045603f) [Medline](#)
11. M. Kaname, S. Yoshifuji, H. Sashida, Ruthenium tetroxide oxidation of cyclic *N*-acylamines by a single layer method: Formation of  $\omega$ -amino acids. *Tetrahedron Lett.* **49**, 2786–2788 (2008). [doi:10.1016/j.tetlet.2008.02.127](https://doi.org/10.1016/j.tetlet.2008.02.127)
12. T. J. Osberger, D. C. Rogness, J. T. Kohrt, A. F. Stepan, M. C. White, Oxidative diversification of amino acids and peptides by small-molecule iron catalysis. *Nature* **537**, 214–219 (2016). [doi:10.1038/nature18941](https://doi.org/10.1038/nature18941) [Medline](#)
13. C. Yu, M. A. Shoaib, N. Iqbal, J. S. Kim, H. J. Ha, E. J. Cho, Selective Ring-Opening of *N*-Alkyl Pyrrolidines with Chloroformates to 4-Chlorobutyl Carbamates. *J. Org. Chem.* **82**, 6615–6620 (2017). [doi:10.1021/acs.joc.7b00681](https://doi.org/10.1021/acs.joc.7b00681) [Medline](#)

14. E. P. Gillis, K. J. Eastman, M. D. Hill, D. J. Donnelly, N. A. Meanwell, Applications of Fluorine in Medicinal Chemistry. *J. Med. Chem.* **58**, 8315–8359 (2015). [doi:10.1021/acs.jmedchem.5b00258](https://doi.org/10.1021/acs.jmedchem.5b00258) [Medline](#)
15. J. Wang, M. Sánchez-Roselló, J. L. Aceña, C. del Pozo, A. E. Sorochinsky, S. Fustero, V. A. Soloshonok, H. Liu, Fluorine in pharmaceutical industry: Fluorine-containing drugs introduced to the market in the last decade (2001-2011). *Chem. Rev.* **114**, 2432–2506 (2014). [doi:10.1021/cr4002879](https://doi.org/10.1021/cr4002879) [Medline](#)
16. S. Purser, P. R. Moore, S. Swallow, V. Gouverneur, Fluorine in medicinal chemistry. *Chem. Soc. Rev.* **37**, 320–330 (2008). [doi:10.1039/B610213C](https://doi.org/10.1039/B610213C) [Medline](#)
17. K. Müller, C. Faeh, F. Diederich, Fluorine in pharmaceuticals: Looking beyond intuition. *Science* **317**, 1881–1886 (2007). [doi:10.1126/science.1131943](https://doi.org/10.1126/science.1131943) [Medline](#)
18. P. A. Champagne, J. Desroches, J.-D. Hamel, M. Vandamme, J.-F. Paquin, Monofluorination of Organic Compounds: 10 Years of Innovation. *Chem. Rev.* **115**, 9073–9174 (2015). [doi:10.1021/cr500706a](https://doi.org/10.1021/cr500706a) [Medline](#)
19. B. Lantaño, A. Postigo, Radical fluorination reactions by thermal and photoinduced methods. *Org. Biomol. Chem.* **15**, 9954–9973 (2017). [doi:10.1039/C7OB02402A](https://doi.org/10.1039/C7OB02402A) [Medline](#)
20. M. Murakami, N. Ishida,  $\beta$ -Scission of Alkoxy Radicals in Synthetic Transformations. *Chem. Lett.* **46**, 1692–1700 (2017). [doi:10.1246/cl.170834](https://doi.org/10.1246/cl.170834)
21. M. Yan, J. C. Lo, J. T. Edwards, P. S. Baran, Radicals: Reactive Intermediates with Translational Potential. *J. Am. Chem. Soc.* **138**, 12692–12714 (2016). [doi:10.1021/jacs.6b08856](https://doi.org/10.1021/jacs.6b08856) [Medline](#)
22. J. Sperry, The Oxidation of Amides to Imides: A Powerful Synthetic Transformation. *Synthesis* **2011**, 3569–3580 (2011). [doi:10.1055/s-0030-1260237](https://doi.org/10.1055/s-0030-1260237)
23. H. N. Po, Heterocyclic and macrocyclic amine complexes of silver(II) and silver(III). *Coord. Chem. Rev.* **20**, 171–195 (1976). [doi:10.1016/S0010-8545\(00\)80324-0](https://doi.org/10.1016/S0010-8545(00)80324-0)
24. H. Zhao, X. Fan, J. Yu, C. Zhu, Silver-catalyzed ring-opening strategy for the synthesis of  $\beta$ - and  $\gamma$ -fluorinated ketones. *J. Am. Chem. Soc.* **137**, 3490–3493 (2015). [doi:10.1021/jacs.5b00939](https://doi.org/10.1021/jacs.5b00939) [Medline](#)
25. S. Ren, C. Feng, T.-P. Loh, Iron- or silver-catalyzed oxidative fluorination of cyclopropanols for the synthesis of  $\beta$ -fluoroketones. *Org. Biomol. Chem.* **13**, 5105–5109 (2015). [doi:10.1039/C5OB00632E](https://doi.org/10.1039/C5OB00632E) [Medline](#)
26. Q. Tian, B. Chen, G. Zhang, Silver-initiated radical ring expansion/fluorination of ethynyl cyclobutanols: Efficient synthesis of monofluoroethenyl cyclopentanones. *Green Chem.* **18**, 6236–6240 (2016). [doi:10.1039/C6GC02656G](https://doi.org/10.1039/C6GC02656G)
27. Y. Deng, N. I. Kauser, S. M. Islam, J. T. Mohr, Ag<sup>II</sup>-Mediated Synthesis of  $\beta$ -Fluoroketones by Oxidative Cyclopropanol Opening. *Eur. J. Org. Chem.* **2017**, 5872–5879 (2017). [doi:10.1002/ejoc.201700899](https://doi.org/10.1002/ejoc.201700899)
28. L. Wang, Z. Zha, W. Qu, H. Qiao, B. P. Lieberman, K. Plössl, H. F. Kung, Synthesis and evaluation of <sup>18</sup>F labeled alanine derivatives as potential tumor imaging agents. *Nucl. Med. Biol.* **39**, 933–943 (2012). [doi:10.1016/j.nucmedbio.2012.03.007](https://doi.org/10.1016/j.nucmedbio.2012.03.007) [Medline](#)

29. F. Yin, Z. Wang, Z. Li, C. Li, Silver-catalyzed decarboxylative fluorination of aliphatic carboxylic acids in aqueous solution. *J. Am. Chem. Soc.* **134**, 10401–10404 (2012). [doi:10.1021/ja3048255](https://doi.org/10.1021/ja3048255) [Medline](#)
30. Z. Antosova, M. Mackova, V. Kral, T. Macek, Therapeutic application of peptides and proteins: Parenteral forever? *Trends Biotechnol.* **27**, 628–635 (2009). [doi:10.1016/j.tibtech.2009.07.009](https://doi.org/10.1016/j.tibtech.2009.07.009) [Medline](#)
31. P. Vlieghe, V. Lisowski, J. Martinez, M. Khrestchatskiy, Synthetic therapeutic peptides: Science and market. *Drug Discov. Today* **15**, 40–56 (2010). [doi:10.1016/j.drudis.2009.10.009](https://doi.org/10.1016/j.drudis.2009.10.009) [Medline](#)
32. A. A. Kaspar, J. M. Reichert, Future directions for peptide therapeutics development. *Drug Discov. Today* **18**, 807–817 (2013). [doi:10.1016/j.drudis.2013.05.011](https://doi.org/10.1016/j.drudis.2013.05.011) [Medline](#)
33. S. Sengupta, G. Mehta, Late stage modification of peptides via C H activation reactions. *Tetrahedron Lett.* **58**, 1357–1372 (2017). [doi:10.1016/j.tetlet.2017.02.069](https://doi.org/10.1016/j.tetlet.2017.02.069)
34. Selectfluor is reported to react with AgNO<sub>3</sub> in acetone-*d*<sub>6</sub>/D<sub>2</sub>O (35).
35. N. R. Patel, R. A. Flowers 2nd, Mechanistic study of silver-catalyzed decarboxylative fluorination. *J. Org. Chem.* **80**, 5834–5841 (2015). [doi:10.1021/acs.joc.5b00826](https://doi.org/10.1021/acs.joc.5b00826) [Medline](#)
36. V. Romanov, C.-K. Siu, U. H. Verkerk, H. El Aribi, A. C. Hopkinson, K. W. M. Siu, Binding energies of the silver ion to alcohols and amides: A theoretical and experimental study. *J. Phys. Chem. A* **112**, 10912–10920 (2008). [doi:10.1021/jp8055653](https://doi.org/10.1021/jp8055653) [Medline](#)
37. V. Romanov, C.-K. Siu, U. H. Verkerk, A. C. Hopkinson, K. W. M. Siu, Bond dissociation energies of solvated silver(I)-amide complexes: Competitive threshold collision-induced dissociations and calculations. *J. Phys. Chem. A* **114**, 6964–6971 (2010). [doi:10.1021/jp102470x](https://doi.org/10.1021/jp102470x) [Medline](#)
38. C. R. Pitts, S. Bloom, R. Woltornist, D. J. Auvenshine, L. R. Ryzhkov, M. A. Siegler, T. Lectka, Direct, catalytic monofluorination of sp<sup>3</sup> C-H bonds: A radical-based mechanism with ionic selectivity. *J. Am. Chem. Soc.* **136**, 9780–9791 (2014). [doi:10.1021/ja505136j](https://doi.org/10.1021/ja505136j) [Medline](#)
39. S. Singh, C.-M. Martinez, S. Calvet-Vitale, A. K. Prasad, T. Prangé, P. I. Dalko, H. Dhimane, Synthesis and Conformational Analysis of Fluorinated Pipercolic Acids. *Synlett* **23**, 2421–2425 (2012). [doi:10.1055/s-0032-1316770](https://doi.org/10.1055/s-0032-1316770)
40. N. A. Meanwell, Synopsis of some recent tactical application of bioisosteres in drug design. *J. Med. Chem.* **54**, 2529–2591 (2011). [doi:10.1021/jm1013693](https://doi.org/10.1021/jm1013693) [Medline](#)
41. C. D. Sessler, M. Rahm, S. Becker, J. M. Goldberg, F. Wang, S. J. Lippard, CF<sub>2</sub>H, a Hydrogen Bond Donor. *J. Am. Chem. Soc.* **139**, 9325–9332 (2017). [doi:10.1021/jacs.7b04457](https://doi.org/10.1021/jacs.7b04457) [Medline](#)
42. C. J. Li, L. Chen, Organic chemistry in water. *Chem. Soc. Rev.* **35**, 68–82 (2006). [doi:10.1039/B507207G](https://doi.org/10.1039/B507207G) [Medline](#)
43. M. O. Simon, C. J. Li, Green chemistry oriented organic synthesis in water. *Chem. Soc. Rev.* **41**, 1415–1427 (2012). [doi:10.1039/C1CS15222J](https://doi.org/10.1039/C1CS15222J) [Medline](#)

44. Y. Otani, O. Nagae, Y. Naruse, S. Inagaki, M. Ohno, K. Yamaguchi, G. Yamamoto, M. Uchiyama, T. Ohwada, An evaluation of amide group planarity in 7-azabicyclo[2.2.1]heptane amides. Low amide bond rotation barrier in solution. *J. Am. Chem. Soc.* **125**, 15191–15199 (2003). [doi:10.1021/ja036644z](https://doi.org/10.1021/ja036644z) [Medline](#)
45. Z. Mucsi, G. A. Chass, I. G. Csizmadia, Amidicity change as a significant driving force and thermodynamic selection rule of transamidation reactions. A synergy between experiment and theory. *J. Phys. Chem. B* **112**, 7885–7893 (2008). [doi:10.1021/jp8023292](https://doi.org/10.1021/jp8023292) [Medline](#)
46. W. Xie, M. Zhao, C. Cui, Cesium Carbonate-Catalyzed Reduction of Amides with Hydrosilanes. *Organometallics* **32**, 7440–7444 (2013). [doi:10.1021/om400951n](https://doi.org/10.1021/om400951n)
47. Y. Kuninobu, H. Ida, M. Nishi, M. Kanai, A meta-selective C-H borylation directed by a secondary interaction between ligand and substrate. *Nat. Chem.* **7**, 712–717 (2015). [doi:10.1038/nchem.2322](https://doi.org/10.1038/nchem.2322) [Medline](#)
48. J. Zhu, Y. Zhang, F. Shi, Y. Deng, Dehydrogenative amide synthesis from alcohol and amine catalyzed by hydrotalcite-supported gold nanoparticles. *Tetrahedron Lett.* **53**, 3178–3180 (2012). [doi:10.1016/j.tetlet.2012.04.048](https://doi.org/10.1016/j.tetlet.2012.04.048)
49. D. A. Gruzdev, S. A. Vakarov, G. L. Levit, V. P. Krasnov, N-Tosyl-(S)-Prolyl Chloride in Kinetic Resolution of Racemic Heterocyclic Amines. *Chem. Heterocycl. Compd.* **49**, 1795–1807 (2014). [doi:10.1007/s10593-014-1432-4](https://doi.org/10.1007/s10593-014-1432-4)
50. K. Ishihara, S. Ohara, H. Yamamoto, 3,4,5-Trifluorobenzeneboronic Acid as an Extremely Active Amidation Catalyst. *J. Org. Chem.* **61**, 4196–4197 (1996). [doi:10.1021/jo9606564](https://doi.org/10.1021/jo9606564) [Medline](#)
51. A. Takács, Z. Kabak-Solt, G. Mikle, L. Kollár, Alkoxy carbonyl piperidines as N-nucleophiles in the palladium-catalyzed aminocarbonylation. *Monatsh. Chem.* **145**, 1473–1478 (2014). [doi:10.1007/s00706-014-1254-1](https://doi.org/10.1007/s00706-014-1254-1)
52. S. C. Ghosh, J. S. Y. Ngiam, A. M. Seayad, D. M. Tuan, C. W. Johannes, A. Chen, Tandem oxidative amidation of benzyl alcohols with amine hydrochloride salts catalysed by iron nitrate. *Tetrahedron Lett.* **54**, 4922–4925 (2013). [doi:10.1016/j.tetlet.2013.07.005](https://doi.org/10.1016/j.tetlet.2013.07.005)
53. U. Košak, B. Brus, S. Gobec, Straightforward synthesis of orthogonally protected piperidin-3-ylmethanamine and piperidin-4-ylmethanamine derivatives. *Tetrahedron Lett.* **55**, 2037–2039 (2014). [doi:10.1016/j.tetlet.2014.02.034](https://doi.org/10.1016/j.tetlet.2014.02.034)
54. Z. Tu, S. M. N. Efang, J. Xu, S. Li, L. A. Jones, S. M. Parsons, R. H. Mach, Synthesis and in vitro and in vivo evaluation of <sup>18</sup>F-labeled positron emission tomography (PET) ligands for imaging the vesicular acetylcholine transporter. *J. Med. Chem.* **52**, 1358–1369 (2009). [doi:10.1021/jm8012344](https://doi.org/10.1021/jm8012344) [Medline](#)
55. P. Zajdel, G. Nomezine, N. Masurier, M. Amblard, M. Pawłowski, J. Martinez, G. Subra, A new highly versatile handle for chemistry on a solid support: The pipecolic linker. *Chemistry* **16**, 7547–7553 (2010). [doi:10.1002/chem.201000313](https://doi.org/10.1002/chem.201000313) [Medline](#)
56. Y. Sasano, S. Nagasawa, M. Yamazaki, M. Shibuya, J. Park, Y. Iwabuchi, Highly chemoselective aerobic oxidation of amino alcohols into amino carbonyl compounds. *Angew. Chem. Int. Ed.* **53**, 3236–3240 (2014). [doi:10.1002/anie.201309634](https://doi.org/10.1002/anie.201309634) [Medline](#)

57. N. Gigant, L. Chausset-Boissarie, M.-C. Belhomme, T. Poisson, X. Pannecoucke, I. Gillaizeau, Copper-catalyzed direct arylation of cyclic enamides using diaryliodonium salts. *Org. Lett.* **15**, 278–281 (2013). [doi:10.1021/ol303400s](https://doi.org/10.1021/ol303400s) [Medline](#)
58. L. Cui, Y. Peng, L. Zhang, A two-step, formal [4 + 2] approach toward piperidin-4-ones via Au catalysis. *J. Am. Chem. Soc.* **131**, 8394–8395 (2009). [doi:10.1021/ja903531g](https://doi.org/10.1021/ja903531g) [Medline](#)
59. N. Gigant, I. Gillaizeau, Construction of nitrogen-fused tetrahydroquinolines via a domino reaction. *Org. Lett.* **14**, 4622–4625 (2012). [doi:10.1021/ol3020732](https://doi.org/10.1021/ol3020732) [Medline](#)
60. M. S'kof, J. Svete, M. Kmetič, S. Golič-Grdadolnik, B. Stanovnik, Stereoselective Amination of 5-Substituted  $\gamma$ -Lactones and  $\gamma$ -Lactams – A Convenient Route for the Preparation of 5-Substituted (3S,5S)-3-Acetylamino-tetrahydrofuran-2-ones and (3S,5S)-3-Acetylamino-pyrrolidin-2-ones. *Eur. J. Org. Chem.* **1999**, 1581–1584 (1999). [doi:10.1002/\(SICI\)1099-0690\(199907\)1999:7<1581:AID-EJOC1581>3.0.CO;2-2](https://doi.org/10.1002/(SICI)1099-0690(199907)1999:7<1581:AID-EJOC1581>3.0.CO;2-2)
61. A. Boto, R. Hernández, E. Suárez, Tandem radical decarboxylation-oxidation of amino acids: A mild and efficient method for the generation of *N*-acyliminium ions and their nucleophilic trapping. *J. Org. Chem.* **65**, 4930–4937 (2000). [doi:10.1021/jo000356t](https://doi.org/10.1021/jo000356t) [Medline](#)
62. M. Rubinshtein, C. R. James, J. L. Young, Y. J. Ma, Y. Kobayashi, N. C. Gianneschi, J. Yang, Facile procedure for generating side chain functionalized poly( $\alpha$ -hydroxy acid) copolymers from aldehydes via a versatile Passerini-type condensation. *Org. Lett.* **12**, 3560–3563 (2010). [doi:10.1021/ol101433v](https://doi.org/10.1021/ol101433v) [Medline](#)
63. Z. Li, Z. Wang, L. Zhu, X. Tan, C. Li, Silver-catalyzed radical fluorination of alkylboronates in aqueous solution. *J. Am. Chem. Soc.* **136**, 16439–16443 (2014). [doi:10.1021/ja509548z](https://doi.org/10.1021/ja509548z) [Medline](#)
